# Supplementary material for: Synthesis of 1,2-dihydro-1-oxophthalazin-4-yl trifluoromethanesulfonate and its application in the synthesis of 4-(aryl/heteroaryl/alkynyl)phthalazin-1(2H)-one
Source: Royal Society of Chemistry journal article supplement (doi:10.1039/c5ra03390j), 2015-01-01

# Supporting information

## **Synthesis of 1, 2-Dihydro-1-oxophthalazin-4-yl trifluoromethanesulfonate and its application in the Synthesis of 4-(aryl/heteroaryl/alkynyl)phthalazin-1(2*H*)-one**

Ganesh Raosaheb Dhage, Santosh Rangnath Deshmukh and Shankar Ramchandra Thopate\*

## <sup>1</sup>H and <sup>13</sup>C NMR spectra

| Entry | Compound                                                   | Code | Page No. |
|-------|------------------------------------------------------------|------|----------|
| 1     | 1,2-dihydro-1-oxophthalazin-4-yl trifluoromethanesulfonate | 3a   | S3       |
| 2     | 4-Phenylphthalazin-1(2H)-one                               | 5a   | S5       |
| 3     | 4-(4-Methoxyphenyl)phthalazin-1(2H)-one                    | 5b   | S7       |
| 4     | 4-(3-Methoxyphenyl)phthalazin-1(2H)-one                    | 5c   | S9       |
| 5     | 4-(2-Methoxyphenyl)phthalazin-1(2H)-one                    | 5d   | S11      |
| 6     | 4-(1,2-Dihydro-1-oxophthalazin-4-yl)benzaldehyde           | 5e   | S13      |
| 7     | 3-(1,2-Dihydro-1-oxophthalazin-4-yl)benzaldehyde           | 5f   | S15      |
| 8     | 4-(3-(Trifluoromethyl)phenyl)phthalazin-1(2H)-one          | 5g   | S17      |
| 9     | 4-(2-(Trifluoromethyl)phenyl)phthalazin-1(2H)-one          | 5h   | S19      |
| 10    | 4-(3-Hydroxyphenyl)phthalazin-1(2H)-one                    | 5i   | S21      |
| 11    | 4-(4-Chlorophenyl)phthalazin-1(2H)-one                     | 5j   | S23      |
| 12    | 4-(3-Chlorophenyl)phthalazin-1(2H)-one                     | 5k   | S25      |
| 13    | 4-(Pyridin-3-yl)phthalazin-1(2H)-one                       | 5l   | S26      |
| 14    | 4-(Thiophen-3-yl)phthalazin-1(2H)-one                      | 5m   | S28      |
| 15    | 4-(Benzo[b]thiophen-2-yl)phthalazin-1(2H)-one              | 5n   | S30      |
| 16    | 4-(Naphthalen-3-yl)phthalazin-1(2H)-one                    | 5o   | S32      |
| 17    | 4-(2-Phenylethynyl)phthalazin-1(2H)-one                    | 6a   | S34      |
| 18    | 4-(2-m-Tolyethynyl)phthalazin-1(2H)-one                    | 6b   | S36      |
| 19    | 4-(2-(3-Aminophenyl)ethynyl)phthalazin-1(2H)-one           | 6c   | S38      |
| 20    | 4-(Hept-1-ynyl)phthalazin-1(2H)-one                        | 6d   | S40      |
| 21    | 4-(Oct-1-ynyl)phthalazin-1(2H)-one                         | 6e   | S42      |
| 22    | 1-Chloro-4-phenylphthalazine                               | 7a   | S44      |
| 23    | 1-Chloro-4-(naphthalen-3-yl)phthalazine                    | 7b   | S46      |
| 24    | 1-Morpholino-4-phenylphthalazine                           | 8a   | S48      |
| 25    | 1-(3-Methoxyphenyl)-4-phenylphthalazine                    | 9a   | S50      |
| 26    | 1-Phenyl-4-(2-m-tolyethynyl)phthalazine                    | 10a  | S52      |

RD164

12.8216

8.3172  
8.2981  
8.0552  
8.0523  
8.0366  
8.0175  
8.0145  
7.9859  
7.9651  
7.9479  
7.9460  
7.8091  
7.7894

5.5824

3.3539

2.5131  
2.5093  
2.5053

1.2051

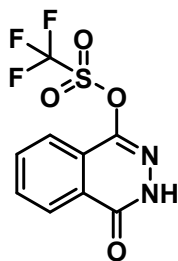

3a

Molecular Weight =294.21  
Molecular Formula =C9H5F3N2O4S

BRUKER  
AVANCE II 400 NMR  
Spectrometer  
SAIF  
Panjab University  
Chandigarh

Current Data Parameters  
NAME Aug07-2014  
EXPNO 250  
PROCNO 1

F2 - Acquisition Parameters  
Date\_ 20140808  
Time\_ 3.04  
INSTRUM spect  
PROBHD 5 mm PABBO BB-  
PULPROG zg30  
TD 65536  
SOLVENT DMSO  
NS 8  
DS 2  
SWH 12019.230 Hz  
FIDRES 0.183399 Hz  
AQ 2.7263477 sec  
RG 228  
DW 41.600 usec  
DE 6.00 usec  
TE 295.9 K  
D1 1.00000000 sec  
TD0 1

===== CHANNEL f1 =====  
NUC1 1H  
P1 10.90 usec  
PL1 -3.00 dB  
SFO1 400.1324710 MHz

F2 - Processing parameters  
SI 32768  
SF 400.1300000 MHz  
WDW EM  
SSB 0  
LB 0.30 Hz  
GB 0  
PC 1.00

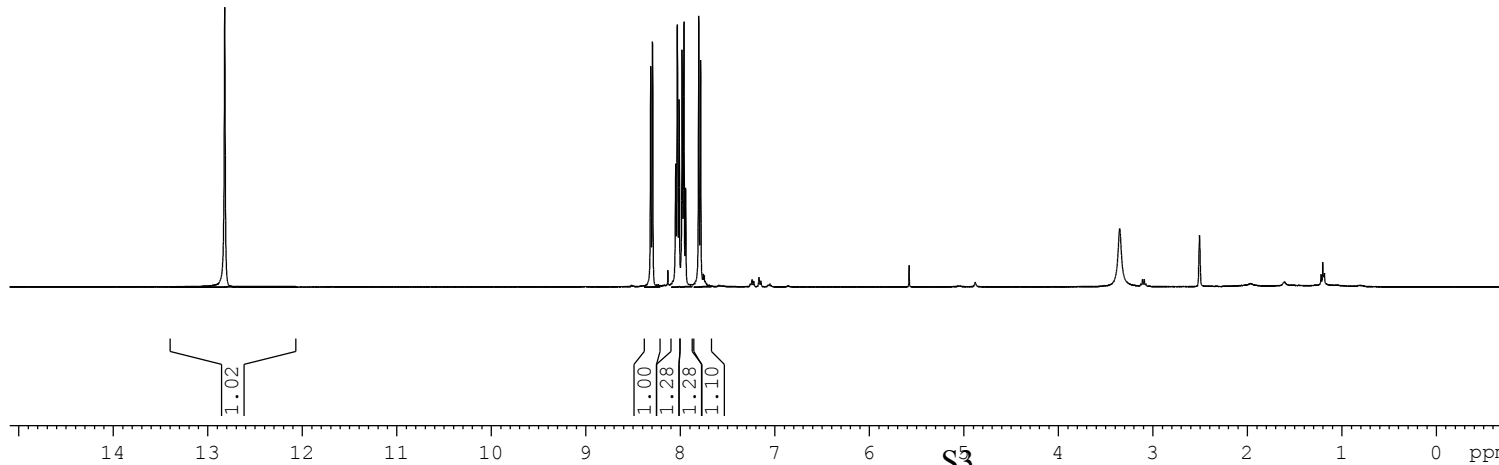

RD164

BRUKER  
AVANCE II 400 NMR  
Spectrometer  
SAIF  
Panjab University  
Chandigarh

163.08  
159.10  
142.67  
135.69  
134.50  
133.44  
129.03  
128.93  
128.71  
126.95  
124.39  
123.60  
122.75  
122.58  
122.26  
119.56  
116.37  
113.19  
78.97  
78.64  
78.32  
40.15  
39.94  
39.73  
39.52  
39.31  
39.11  
38.90

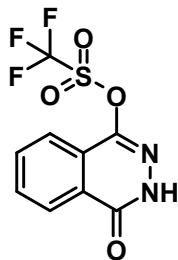

3a

Molecular Weight =294.21  
Molecular Formula =C9H5F3N2O4S

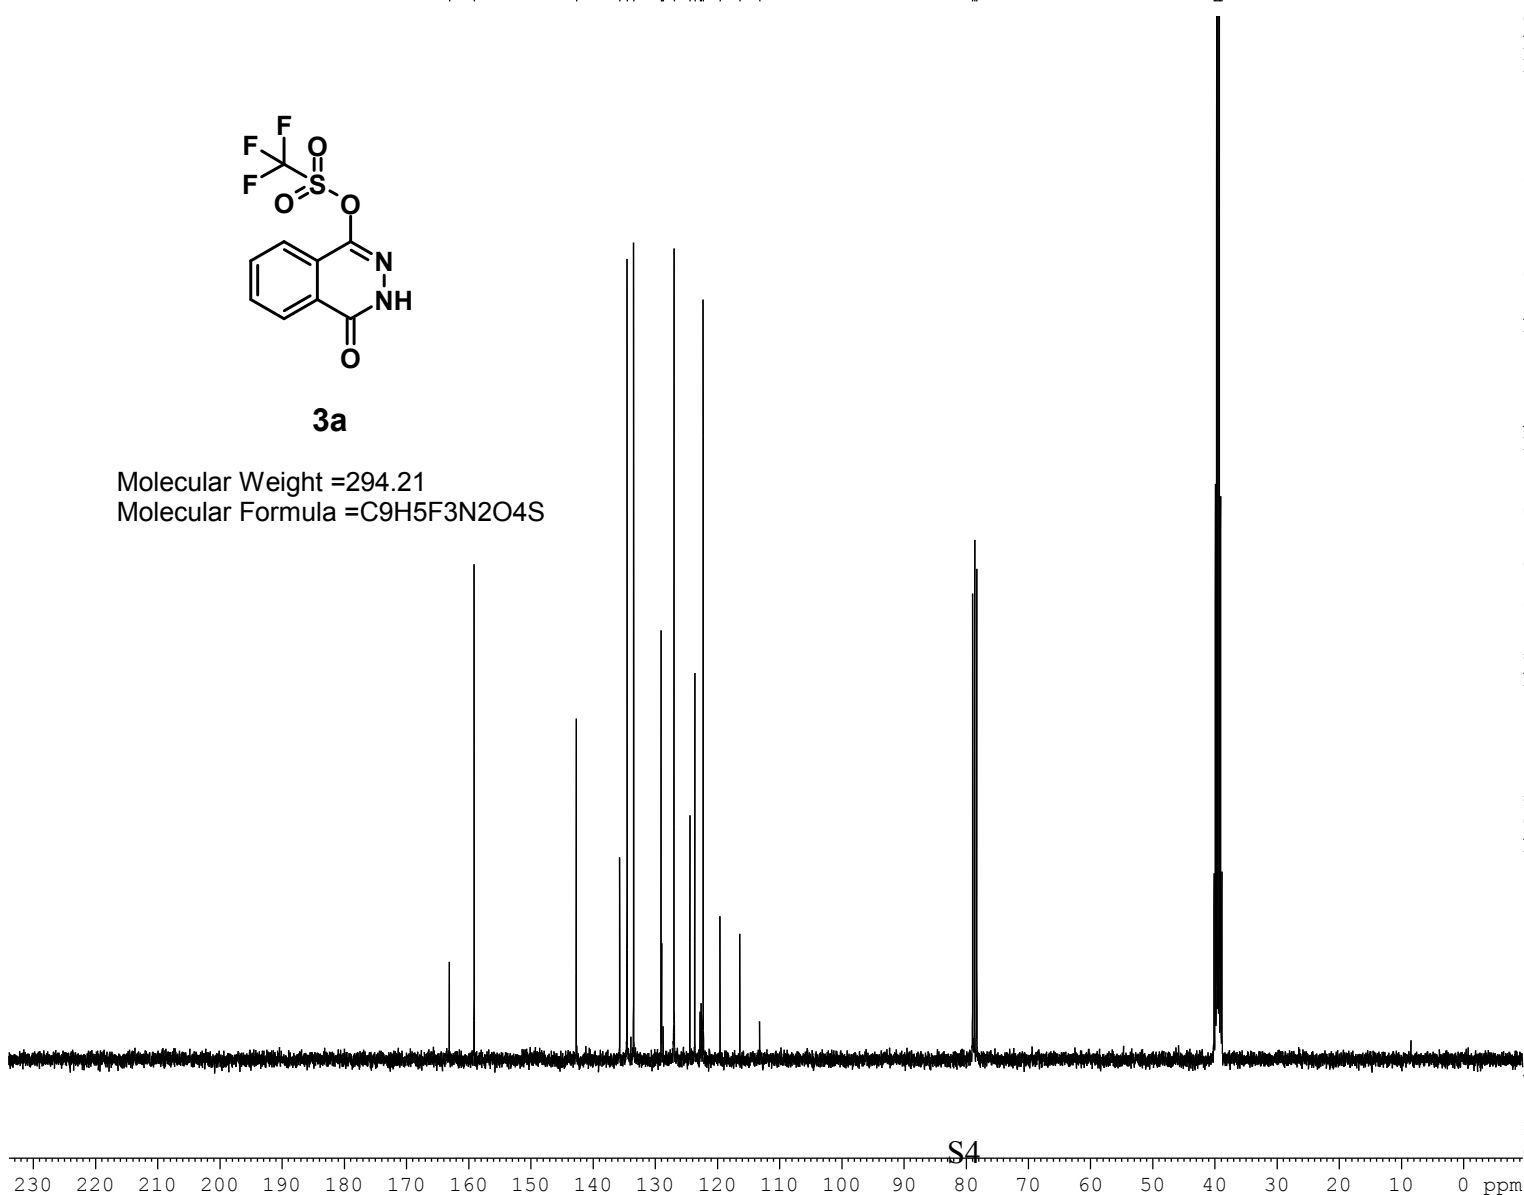

Current Data Parameters  
NAME Aug07-2014  
EXPNO 251  
PROCNO 1

F2 - Acquisition Parameters  
Date\_ 20140808  
Time\_ 3.33  
INSTRUM spect  
PROBHD 5 mm PABBO BB-  
PULPROG zgpg30  
TD 65536  
SOLVENT DMSO  
NS 512  
DS 4  
SWH 29761.904 Hz  
FIDRES 0.454131 Hz  
AQ 1.1010548 sec  
RG 724  
DW 16.800 usec  
DE 6.00 usec  
TE 296.4 K  
D1 2.0000000 sec  
d11 0.0300000 sec  
DELTA 1.89999998 sec  
TD0 1

==== CHANNEL f1 =====  
NUC1 13C  
P1 9.60 usec  
PL1 -2.00 dB  
SFO1 100.6228298 MHz

==== CHANNEL f2 =====  
CPDPRG2 waltz16  
NUC2 1H  
PCPD2 80.00 usec  
PL2 -3.00 dB  
PL12 14.31 dB  
PL13 18.00 dB  
SFO2 400.1316005 MHz

F2 - Processing parameters  
SI 32768  
SF 100.6128193 MHz  
WDW EM  
SSB 0  
LB 1.00 Hz  
GB 0  
PC 1.40

SRD-A  
 PROTON\_DepttChem CDC13 {D:\AHMEDNAGAR} root 19

8.537  
 8.535  
 8.533  
 7.829  
 7.824  
 7.816  
 7.811  
 7.809  
 7.803  
 7.796  
 7.793  
 7.789  
 7.784  
 7.779  
 7.777  
 7.774  
 7.771  
 7.764  
 7.759  
 7.758  
 7.604  
 7.599  
 7.598  
 7.595  
 7.589  
 7.585  
 7.579  
 7.573  
 7.551  
 7.550  
 7.548  
 7.542  
 7.539  
 7.532  
 7.528  
 7.522  
 7.518  
 7.514  
 7.512  
 7.509  
 7.260  
 4.411  
 4.396  
 4.377  
 4.363  
 4.126  
 4.112  
 2.043  
 1.795  
 1.250  
 1.241  
 0.875  
 0.070  
 -0.004

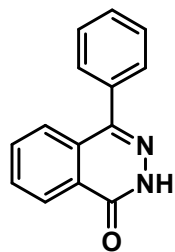

5a

Molecular Weight = 222.25  
 Molecular Formula = C<sub>14</sub>H<sub>10</sub>N<sub>2</sub>O

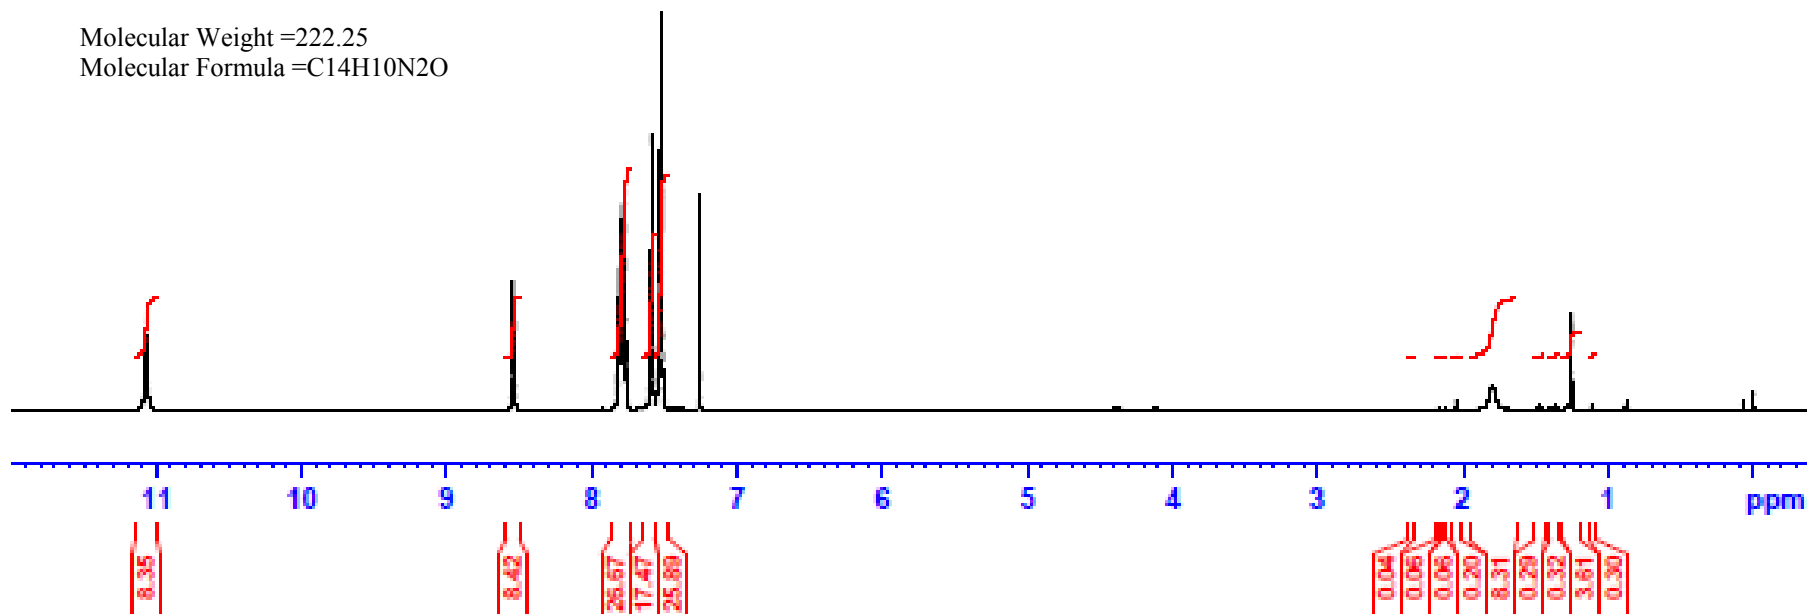

SRD-A  
C13CPD CDC13 {D:\AHMEDNAGAR} root 19

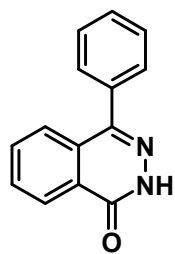

**5a**

Molecular Weight =222.25  
Molecular Formula =C14H10N2O

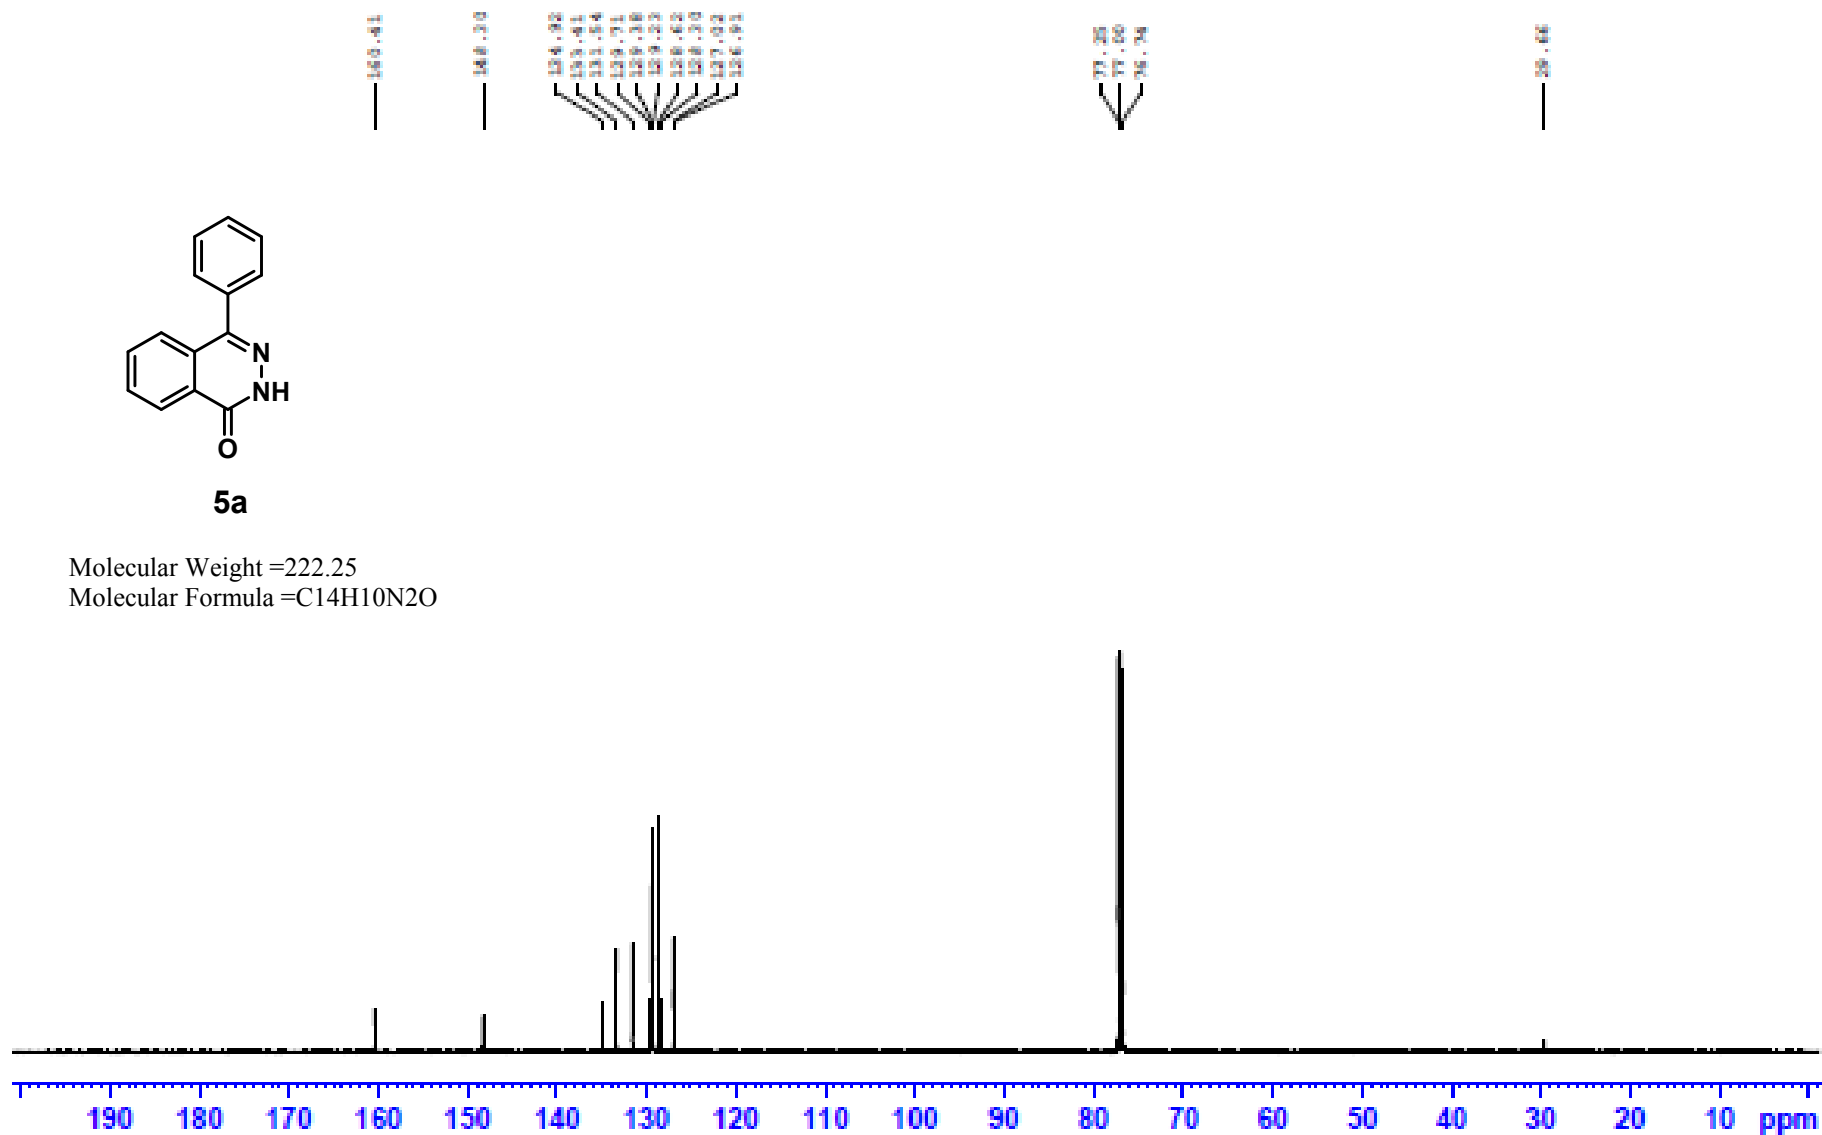

SRD-N

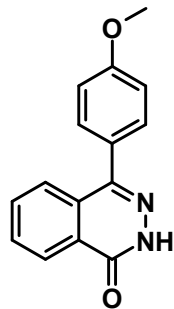

**5b**

Molecular Weight =252.28  
Molecular Formula =C<sub>15</sub>H<sub>12</sub>N<sub>2</sub>O<sub>2</sub>

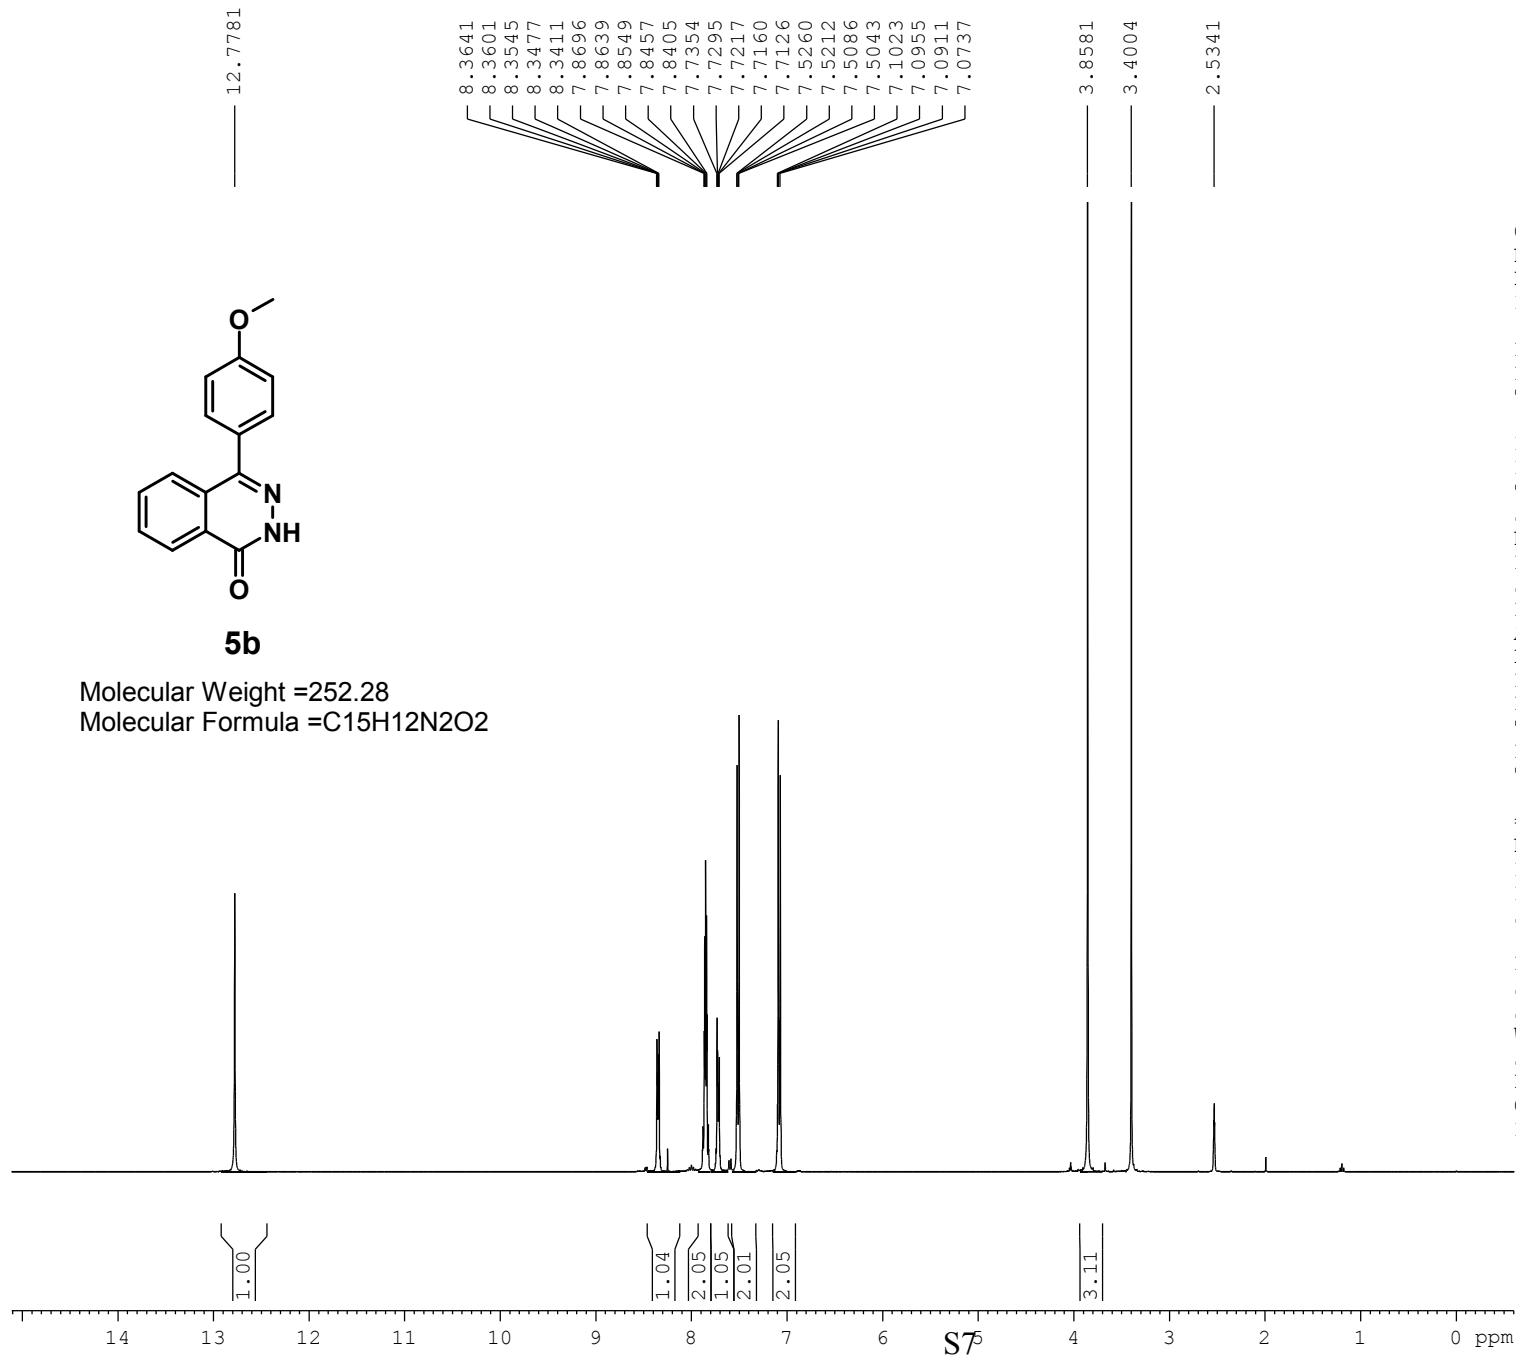

BRUKER  
AVANCE II 400 NMR  
Spectrometer  
SAIF  
Panjab University  
Chandigarh

Current Data Parameters  
NAME Jan01-2015  
EXPNO 40  
PROCNO 1

F2 - Acquisition Parameters  
Date\_ 20150101  
Time 12.28  
INSTRUM spect  
PROBHD 5 mm PABBO BB-  
PULPROG zg30  
TD 65536  
SOLVENT DMSO  
NS 8  
DS 2  
SWH 12019.230 Hz  
FIDRES 0.183399 Hz  
AQ 2.7263477 sec  
RG 181  
DW 41.600 usec  
DE 6.00 usec  
TE 292.9 K  
D1 1.0000000 sec  
TD0 1

==== CHANNEL f1 =====  
NUC1 1H  
P1 10.90 usec  
PL1 -3.00 dB  
SFO1 400.1324710 MHz

F2 - Processing parameters  
SI 32768  
SF 400.1299899 MHz  
WDW EM  
SSB 0  
LB 0.30 Hz  
GB 0  
PC 1.00

SRD-N

BRUKER  
AVANCE II 400 NMR  
Spectrometer  
SAIF  
Panjab University  
Chandigarh

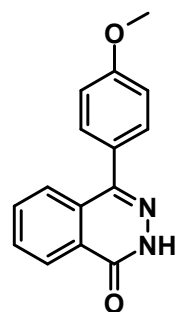

**5b**

Molecular Weight =252.28  
Molecular Formula =C<sub>15</sub>H<sub>12</sub>N<sub>2</sub>O<sub>2</sub>

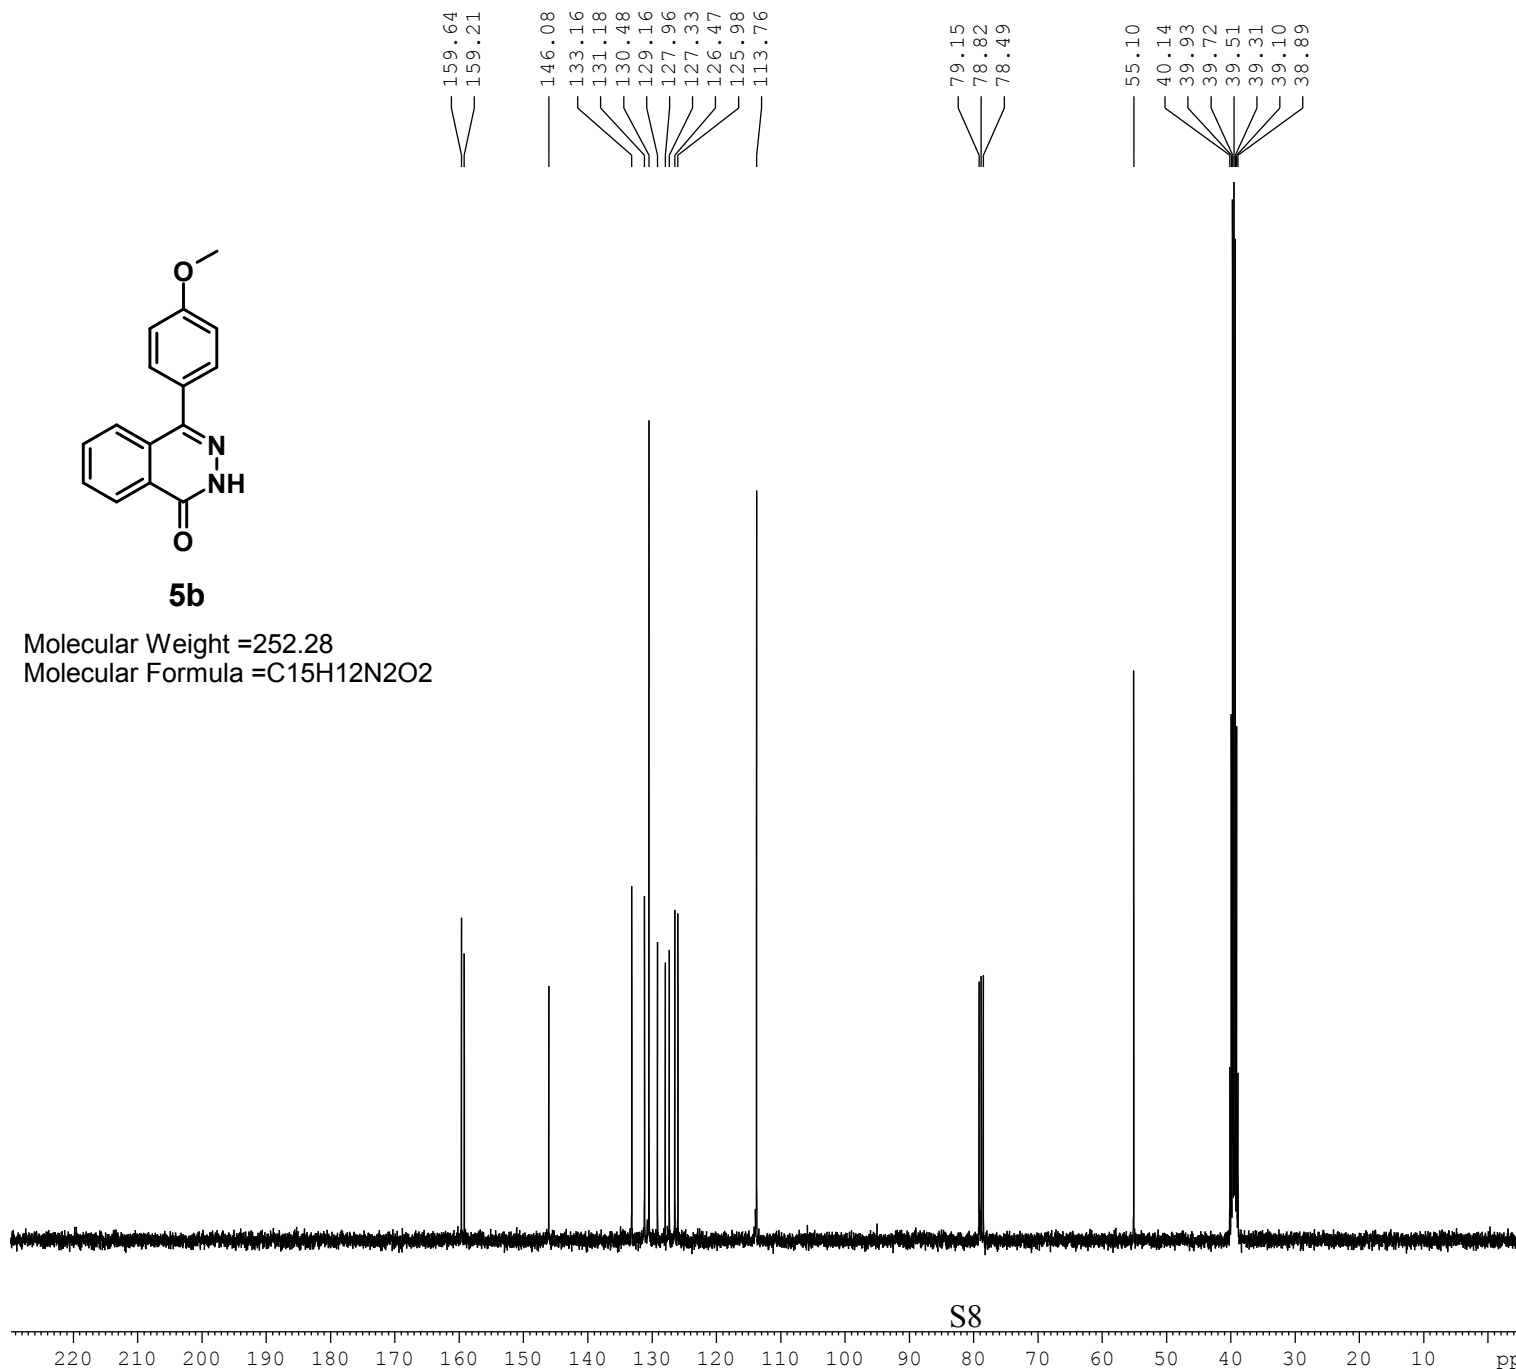

Current Data Parameters  
NAME Jan01-2015  
EXPNO 41  
PROCNO 1

F2 - Acquisition Parameters  
Date\_ 20150101  
Time\_ 12.34  
INSTRUM spect  
PROBHD 5 mm PABBO BB-  
PULPROG zgpg30  
TD 65536  
SOLVENT DMSO  
NS 248  
DS 4  
SWH 29761.904 Hz  
FIDRES 0.454131 Hz  
AQ 1.1010548 sec  
RG 1030  
DW 16.800 usec  
DE 6.00 usec  
TE 293.4 K  
D1 2.00000000 sec  
d11 0.03000000 sec  
DELTA 1.89999998 sec  
TD0 1

==== CHANNEL f1 =====  
NUC1 13C  
P1 9.60 usec  
PL1 -2.00 dB  
SFO1 100.6228298 MHz

==== CHANNEL f2 =====  
CPDPRG2 waltz16  
NUC2 1H  
PCPD2 80.00 usec  
PL2 -3.00 dB  
PL12 14.31 dB  
PL13 18.00 dB  
SFO2 400.1316005 MHz

F2 - Processing parameters  
SI 32768  
SF 100.6128193 MHz  
WDW EM  
SSB 0  
LB 1.00 Hz  
GB 0  
PC 1.40



SRD-L

BRUKER  
AVANCE II 400 NMR  
Spectrometer  
SAIF  
Panjab University  
Chandigarh

Current Data Parameters  
NAME Jan01-2015  
EXPNO 20  
PROCNO 1

F2 - Acquisition Parameters  
Date\_ 20150101  
Time 11.42  
INSTRUM spect  
PROBHD 5 mm PABBO BB-  
PULPROG zg30  
TD 65536  
SOLVENT DMSO  
NS 8  
DS 2  
SWH 12019.230 Hz  
FIDRES 0.183399 Hz  
AQ 2.7263477 sec  
RG 181  
DW 41.600 usec  
DE 6.00 usec  
TE 292.7 K  
D1 1.00000000 sec  
TD0 1

===== CHANNEL f1 =====  
NUC1 1H  
P1 10.90 usec  
PL1 -3.00 dB  
SFO1 400.1324710 MHz

F2 - Processing parameters  
SI 32768  
SF 400.1299901 MHz  
WDW EM  
SSB 0  
LB 0.30 Hz  
GB 0  
PC 1.00

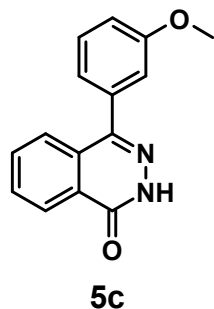

Molecular Weight =252.28  
Molecular Formula =C<sub>15</sub>H<sub>12</sub>N<sub>2</sub>O<sub>2</sub>

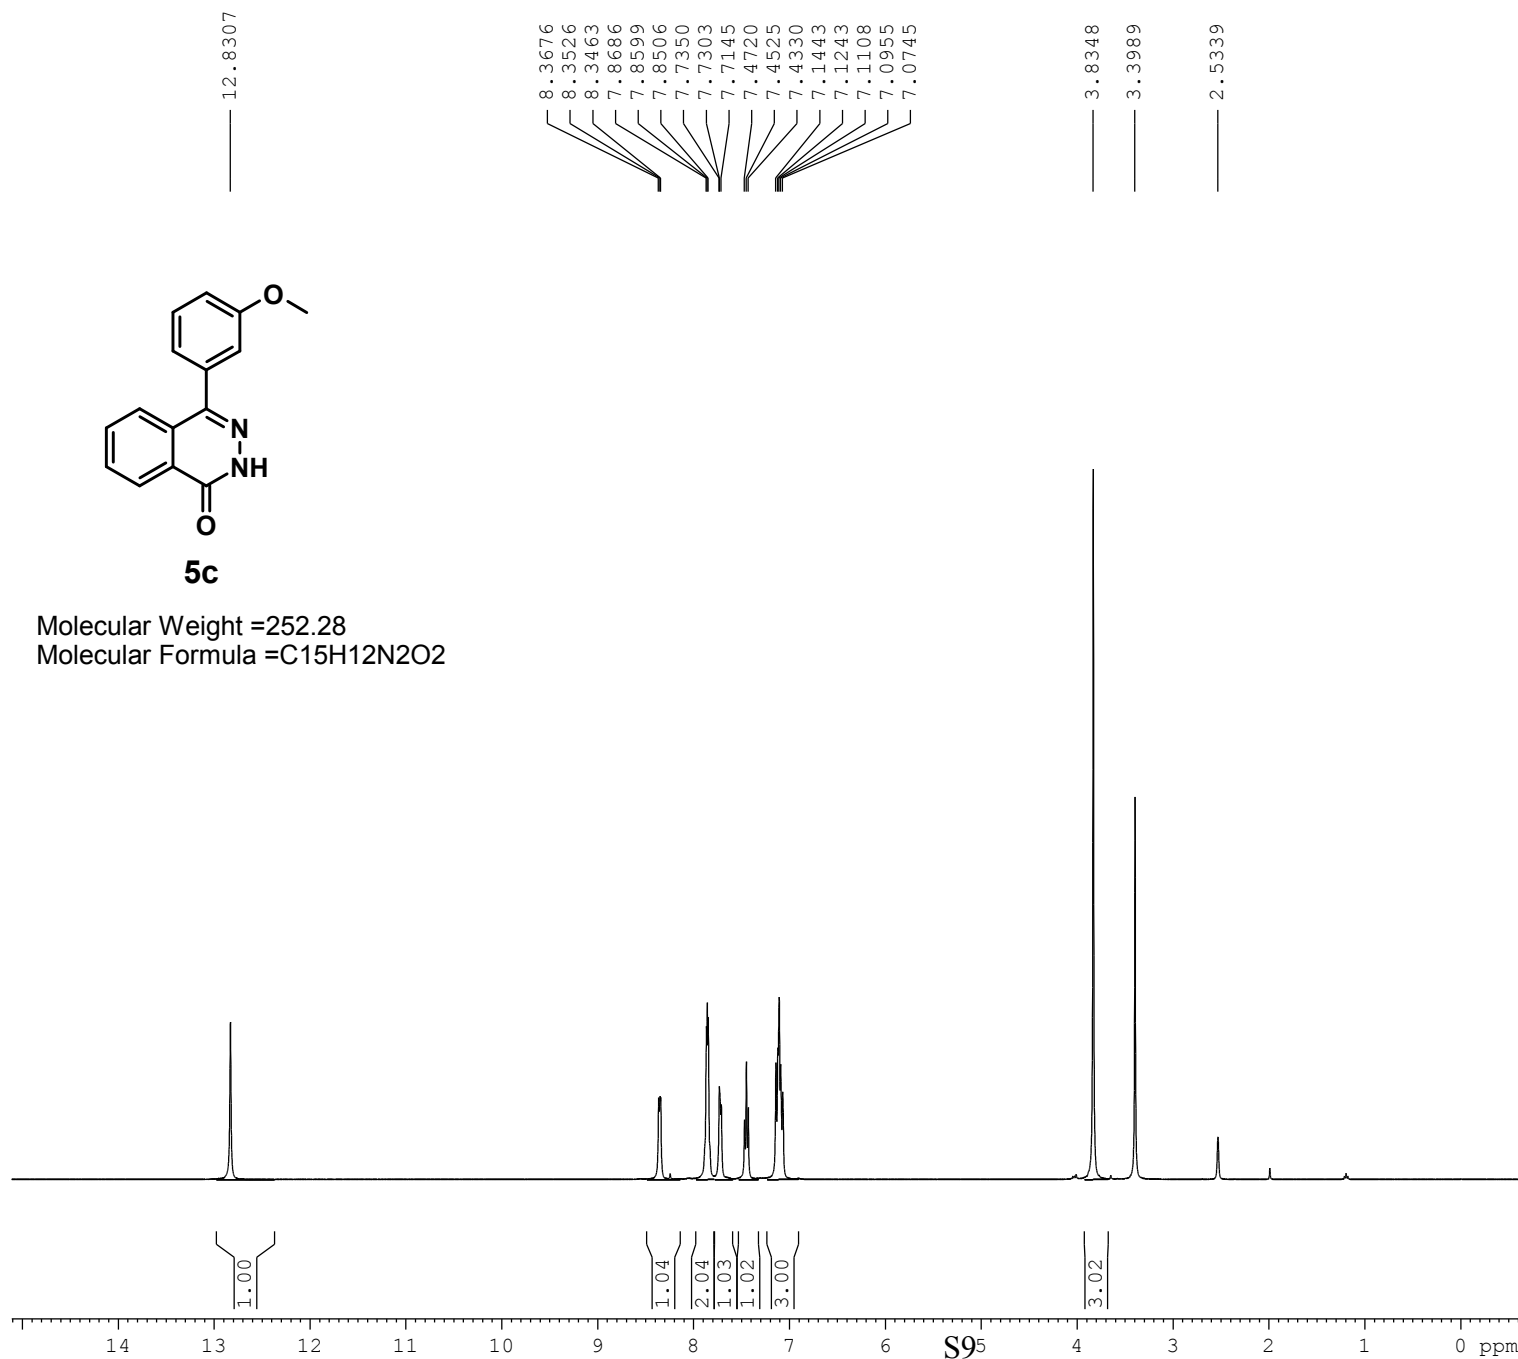

SRD-L

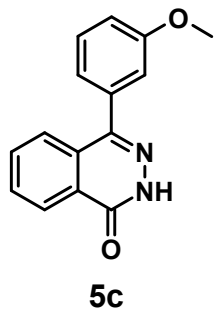

Molecular Weight =252.28  
Molecular Formula =C<sub>15</sub>H<sub>12</sub>N<sub>2</sub>O<sub>2</sub>

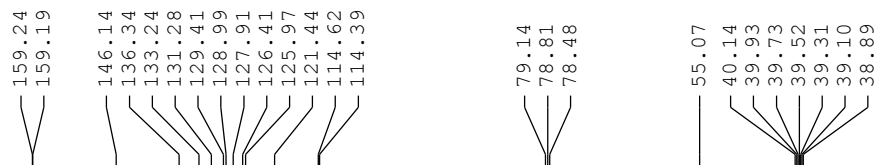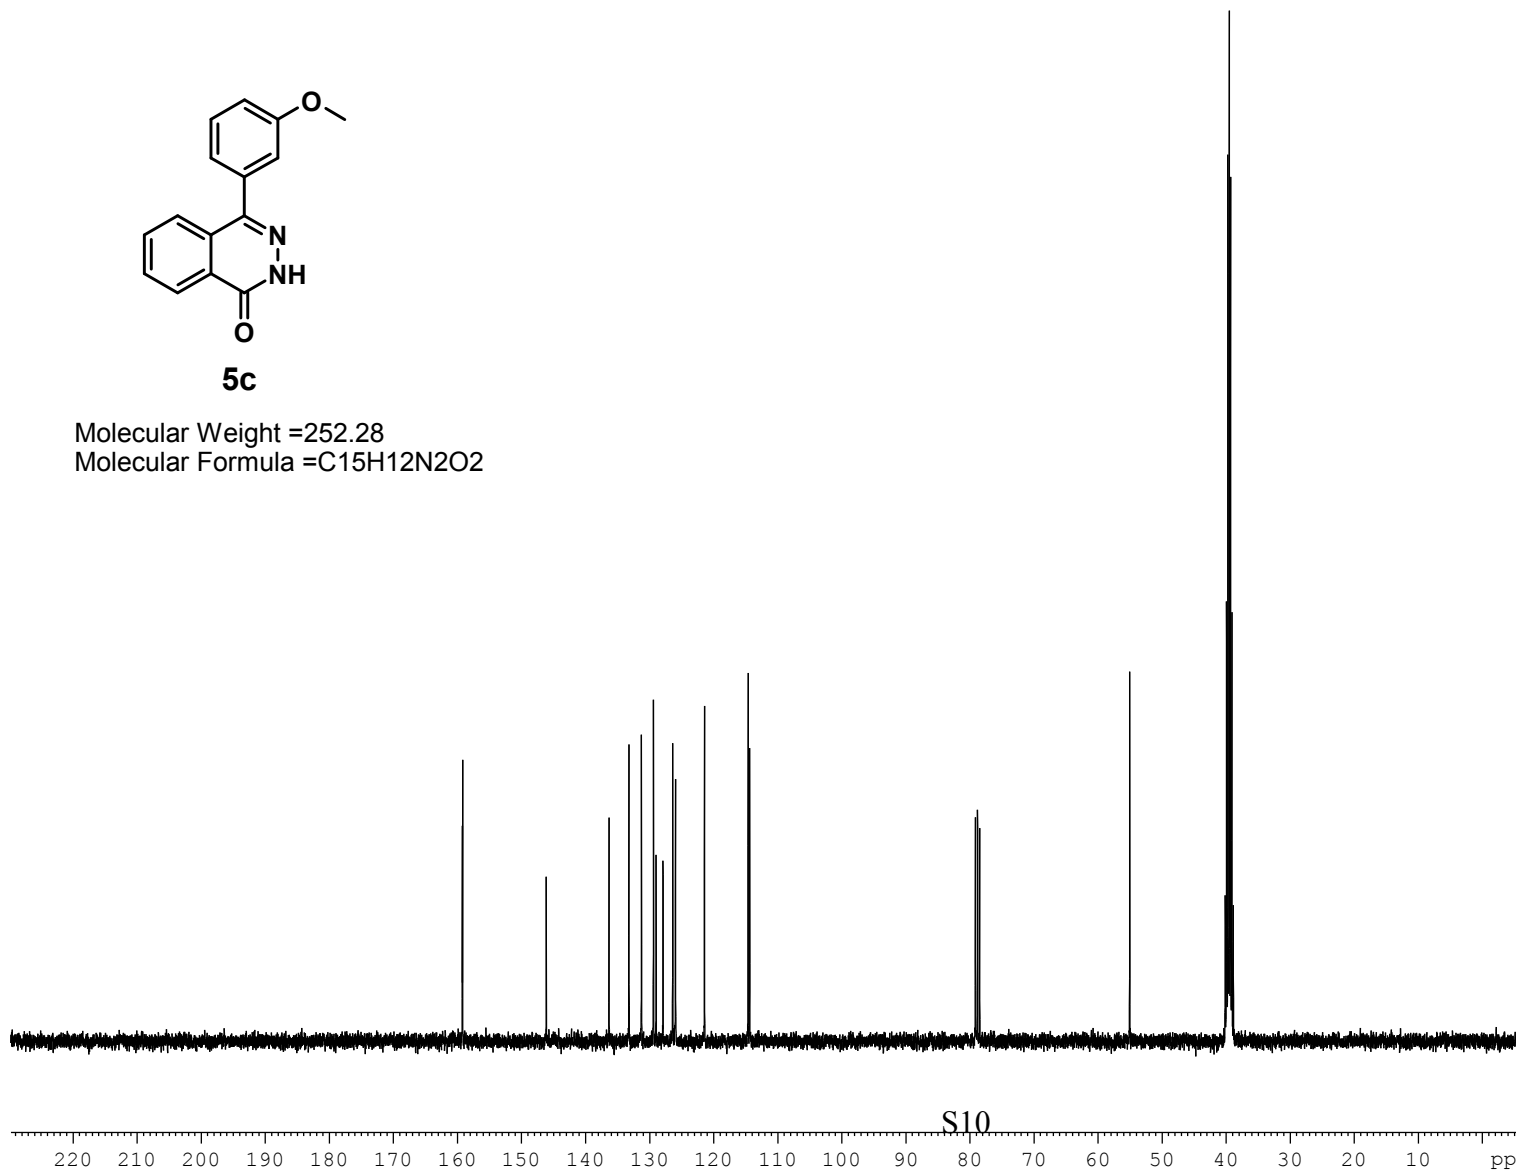

BRUKER  
AVANCE II 400 NMR  
Spectrometer  
SAIF  
Panjab University  
Chandigarh

Current Data Parameters  
NAME Jan01-2015  
EXPNO 21  
PROCNO 1

F2 - Acquisition Parameters  
Date\_ 20150101  
Time\_ 11.49  
INSTRUM spect  
PROBHD 5 mm PABBO BB-  
PULPROG zgpg30  
TD 65536  
SOLVENT DMSO  
NS 240  
DS 4  
SWH 29761.904 Hz  
FIDRES 0.454131 Hz  
AQ 1.1010548 sec  
RG 1030  
DW 16.800 usec  
DE 6.00 usec  
TE 293.1 K  
D1 2.00000000 sec  
d11 0.03000000 sec  
DELTA 1.899999998 sec  
TD0 1

==== CHANNEL f1 =====  
NUC1 13C  
P1 9.60 usec  
PL1 -2.00 dB  
SFO1 100.6228298 MHz

==== CHANNEL f2 =====  
CPDPRG2 waltz16  
NUC2 1H  
PCPD2 80.00 usec  
PL2 -3.00 dB  
PL12 14.31 dB  
PL13 18.00 dB  
SFO2 400.1316005 MHz

F2 - Processing parameters  
SI 32768  
SF 100.6128193 MHz  
WDW EM  
SSB 0  
LB 1.00 Hz  
GB 0  
PC 1.40

avtar\_saifpu@yahoo.co.in

SRD-M

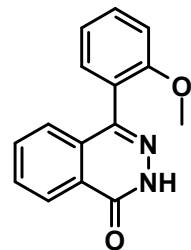

**5d**

Molecular Weight =252.28  
Molecular Formula =C<sub>15</sub>H<sub>12</sub>N<sub>2</sub>O<sub>2</sub>

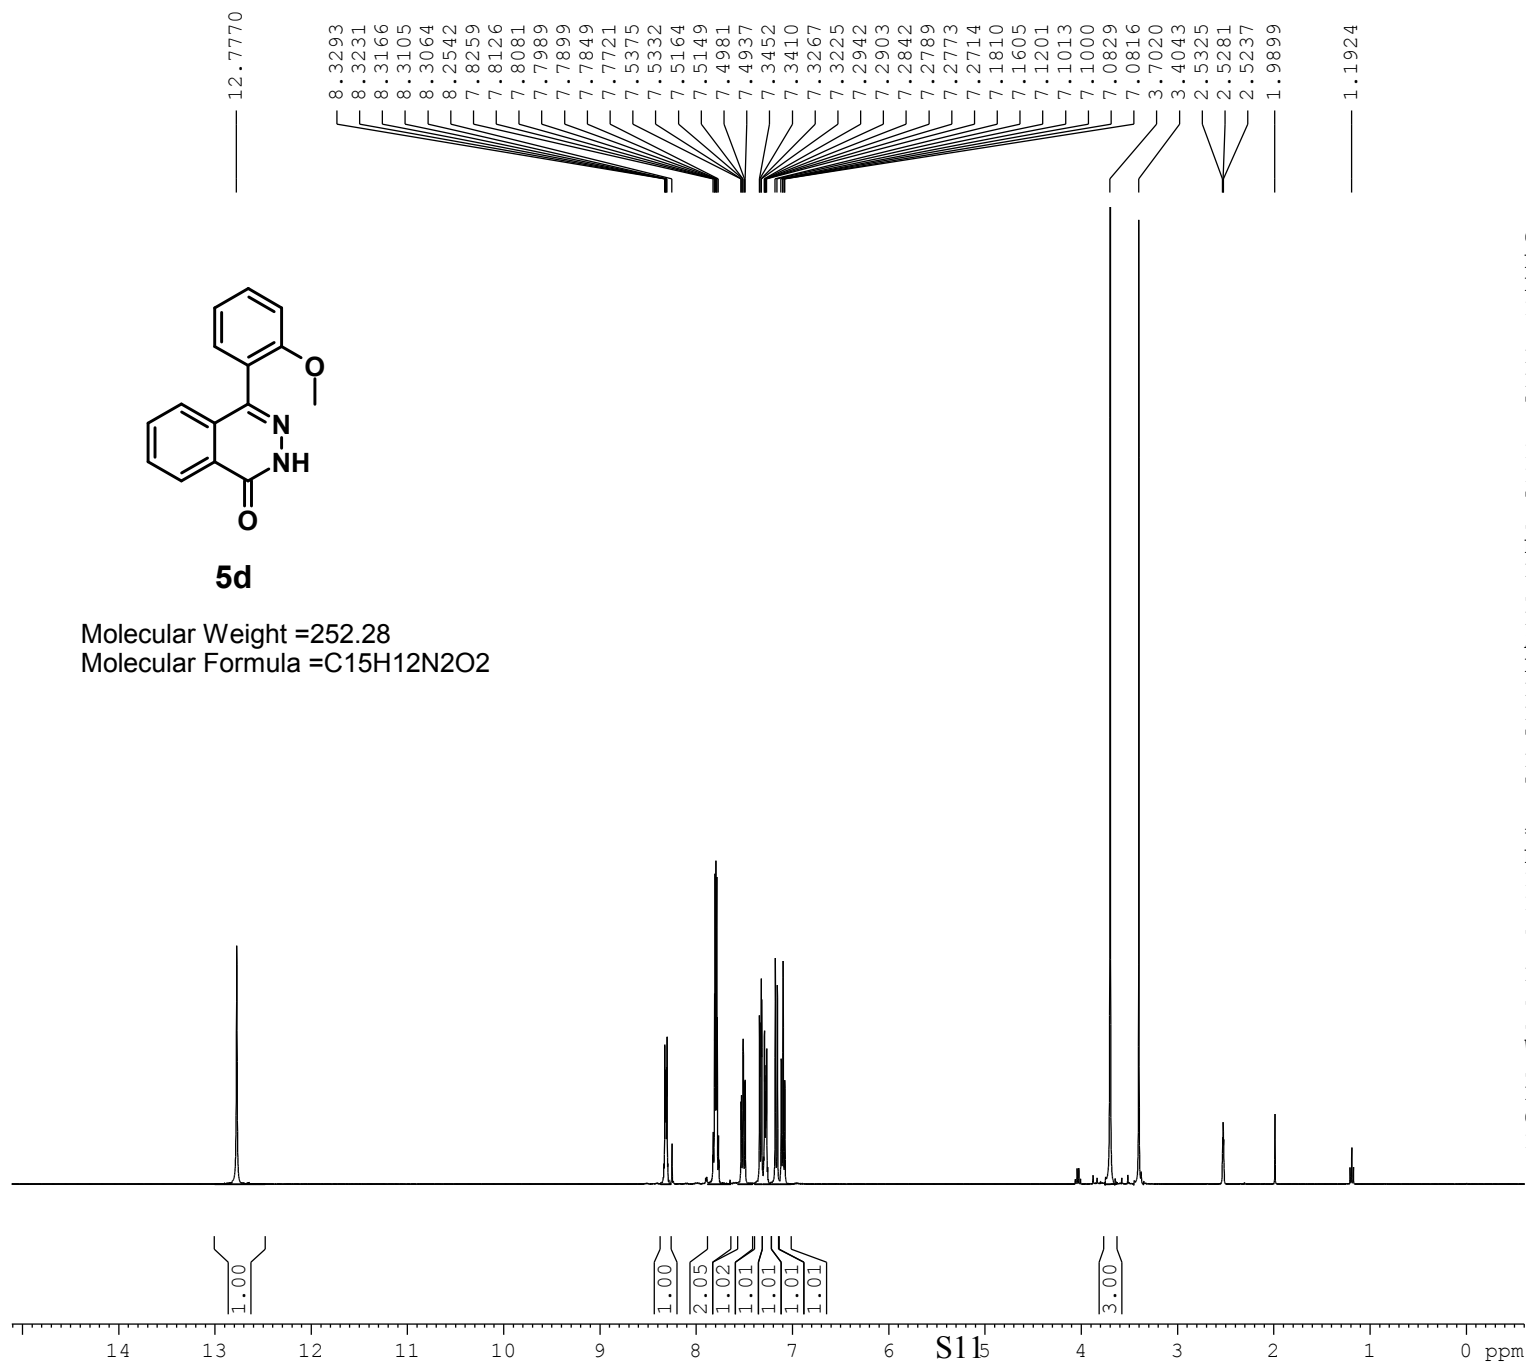

BRUKER  
AVANCE II 400 NMR  
Spectrometer  
SAIF  
Panjab University  
Chandigarh

Current Data Parameters  
NAME Jan01-2015  
EXPNO 30  
PROCNO 1

F2 - Acquisition Parameters  
Date 20150101  
Time 12.02  
INSTRUM spect  
PROBHD 5 mm PABBO BB-  
PULPROG zg30  
TD 65536  
SOLVENT DMSO  
NS 8  
DS 2  
SWH 12019.230 Hz  
FIDRES 0.183399 Hz  
AQ 2.7263477 sec  
RG 161  
DW 41.600 usec  
DE 6.00 usec  
TE 292.7 K  
D1 1.0000000 sec  
TD0 1

==== CHANNEL f1 =====  
NUC1 1H  
P1 10.90 usec  
PL1 -3.00 dB  
SFO1 400.1324710 MHz

F2 - Processing parameters  
SI 32768  
SF 400.1299923 MHz  
WDW EM  
SSB 0  
LB 0.30 Hz  
GB 0  
PC 1.00

SRD-M

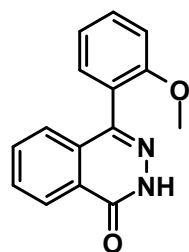

5d

Molecular Weight =252.28  
Molecular Formula =C<sub>15</sub>H<sub>12</sub>N<sub>2</sub>O<sub>2</sub>

159.50  
157.10  
144.89  
133.02  
131.10  
130.82  
130.63  
129.84  
127.38  
126.67  
125.51  
123.89  
120.54  
111.20  
79.16  
78.83  
78.50  
55.20  
40.14  
39.93  
39.72  
39.51  
39.30  
39.09  
38.89

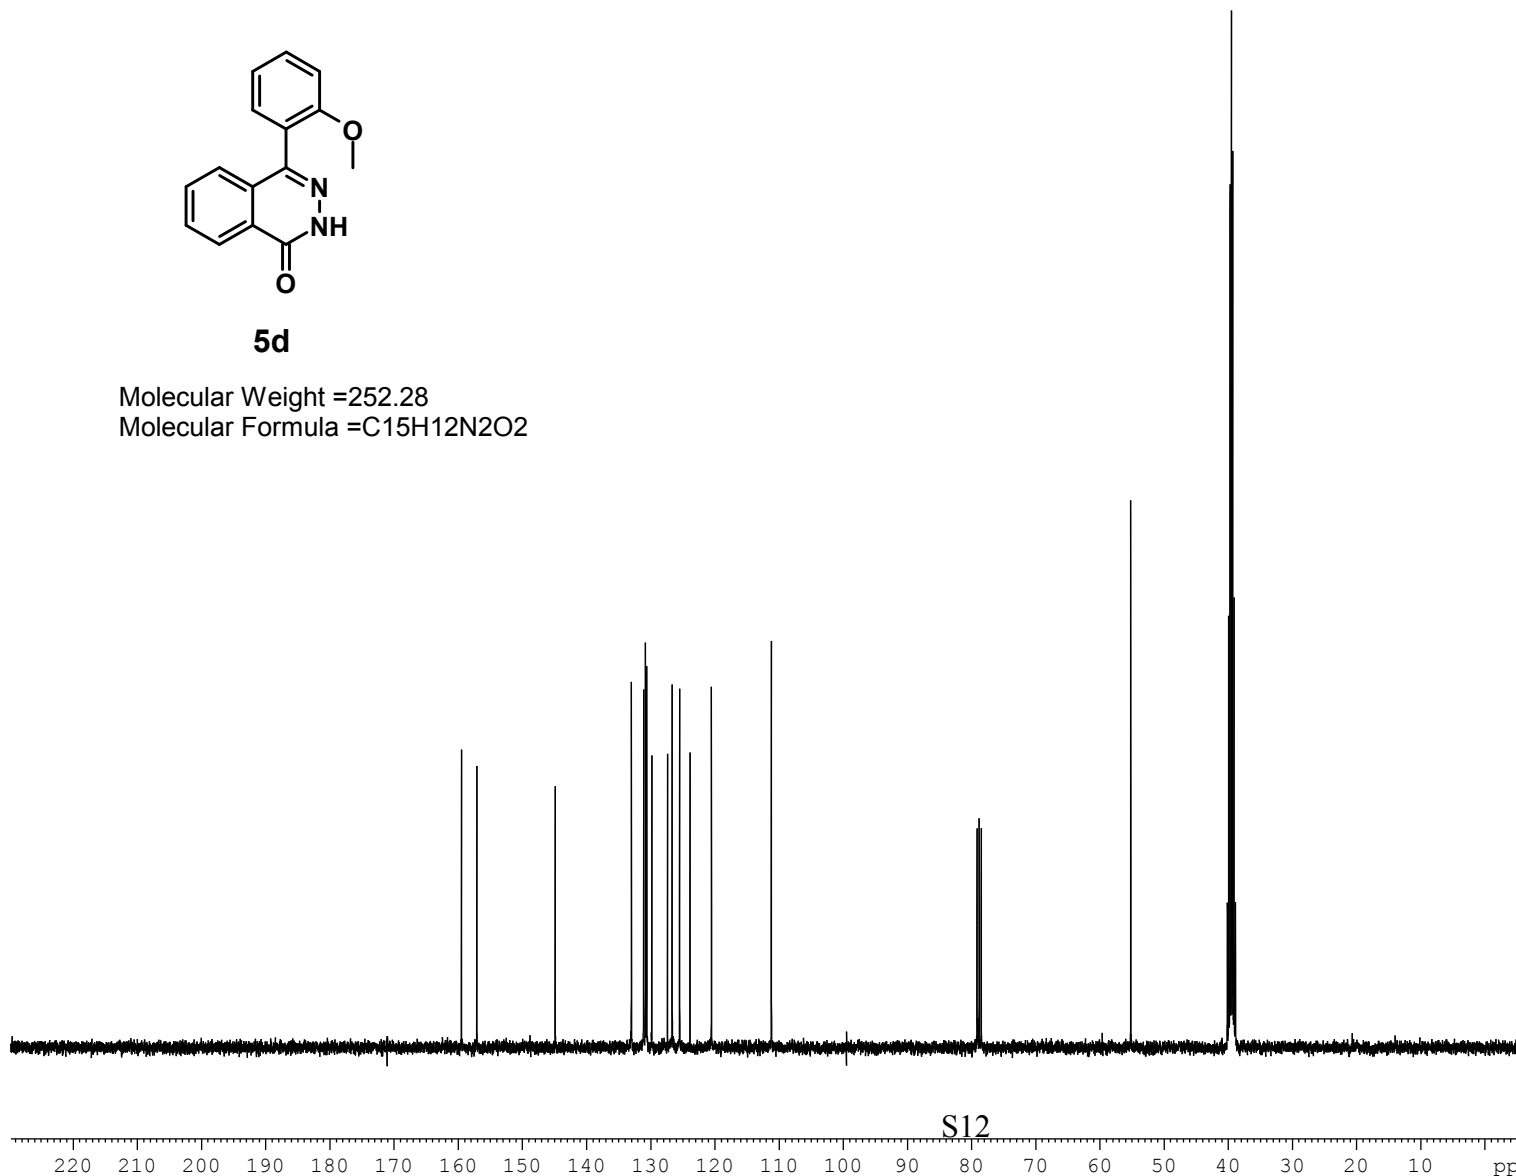

BRUKER  
AVANCE II 400 NMR  
Spectrometer  
SAIF  
Panjab University  
Chandigarh

Current Data Parameters  
NAME Jan01-2015  
EXPNO 31  
PROCNO 1

F2 - Acquisition Parameters  
Date 20150101  
Time 12.23  
INSTRUM spect  
PROBHD 5 mm PABBO BB-  
PULPROG zgpg30  
TD 65536  
SOLVENT DMSO  
NS 373  
DS 4  
SWH 29761.904 Hz  
FIDRES 0.454131 Hz  
AQ 1.1010548 sec  
RG 32  
DW 16.800 usec  
DE 6.00 usec  
TE 293.4 K  
D1 2.00000000 sec  
d11 0.03000000 sec  
DELTA 1.89999998 sec  
TD0 1

==== CHANNEL f1 =====  
NUC1 13C  
P1 9.60 usec  
PL1 -2.00 dB  
SFO1 100.6228298 MHz

==== CHANNEL f2 =====  
CPDPRG2 waltz16  
NUC2 1H  
PCPD2 80.00 usec  
PL2 -3.00 dB  
PL12 14.31 dB  
PL13 18.00 dB  
SFO2 400.1316005 MHz

F2 - Processing parameters  
SI 32768  
SF 100.6128193 MHz  
WDW EM  
SSB 0  
LB 1.00 Hz  
GB 0  
PC 1.40

SRD-T

BRUKER  
AVANCE II 400 NMR  
Spectrometer  
SAIF  
Panjab University  
Chandigarh

Current Data Parameters  
NAME Jan01-2015  
EXPNO 100  
PROCNO 1

F2 - Acquisition Parameters  
Date 20150101  
Time 15.56  
INSTRUM spect  
PROBHD 5 mm PABBO BB-  
PULPROG zg30  
TD 65536  
SOLVENT DMSO  
NS 8  
DS 2  
SWH 12019.230 Hz  
FIDRES 0.183399 Hz  
AQ 2.7263477 sec  
RG 287  
DW 41.600 usec  
DE 6.00 usec  
TE 293.4 K  
D1 1.0000000 sec  
TD0 1

==== CHANNEL f1 =====  
NUC1 1H  
P1 10.90 usec  
PL1 -3.00 dB  
SFO1 400.1324710 MHz

F2 - Processing parameters  
SI 32768  
SF 400.1299901 MHz  
WDW EM  
SSB 0  
LB 0.30 Hz  
GB 0  
PC 1.00

12.9627  
10.1350  
8.3902  
8.3847  
8.3775  
8.3747  
8.3670  
8.0952  
8.0748  
7.8957  
7.8902  
7.8849  
7.8833  
7.8778  
7.8725  
7.8311  
7.8108  
7.7153  
7.7080  
7.7049  
7.6976  
7.6923  
3.3842  
2.5421  
2.5379  
2.5335  
2.5291  
1.9924  
1.2013

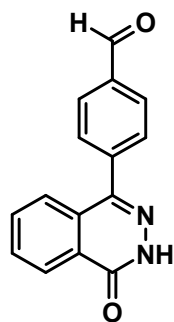

5e

Molecular Weight =250.26  
Molecular Formula =C15H10N2O2

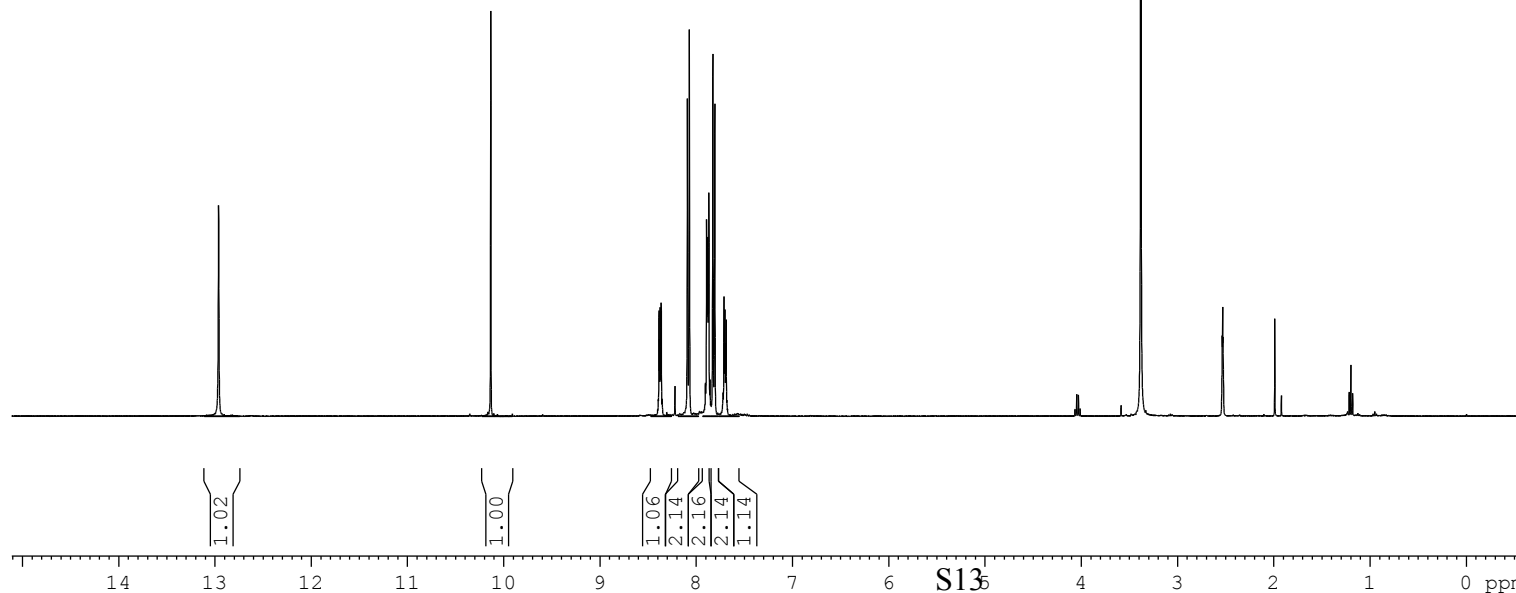

SRD-T

BRUKER  
AVANCE II 400 NMR  
Spectrometer  
SAIF  
Panjab University  
Chandigarh

192.28

159.22

145.24  
140.69  
136.11  
133.39  
131.49  
129.97  
129.51  
128.60  
127.93  
126.14  
126.05

79.10  
78.77  
78.44

40.15  
39.95  
39.74  
39.53  
39.32  
39.11  
38.90

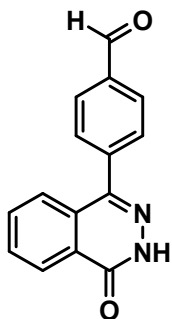

5e

Molecular Weight =250.26  
Molecular Formula =C15H10N2O2

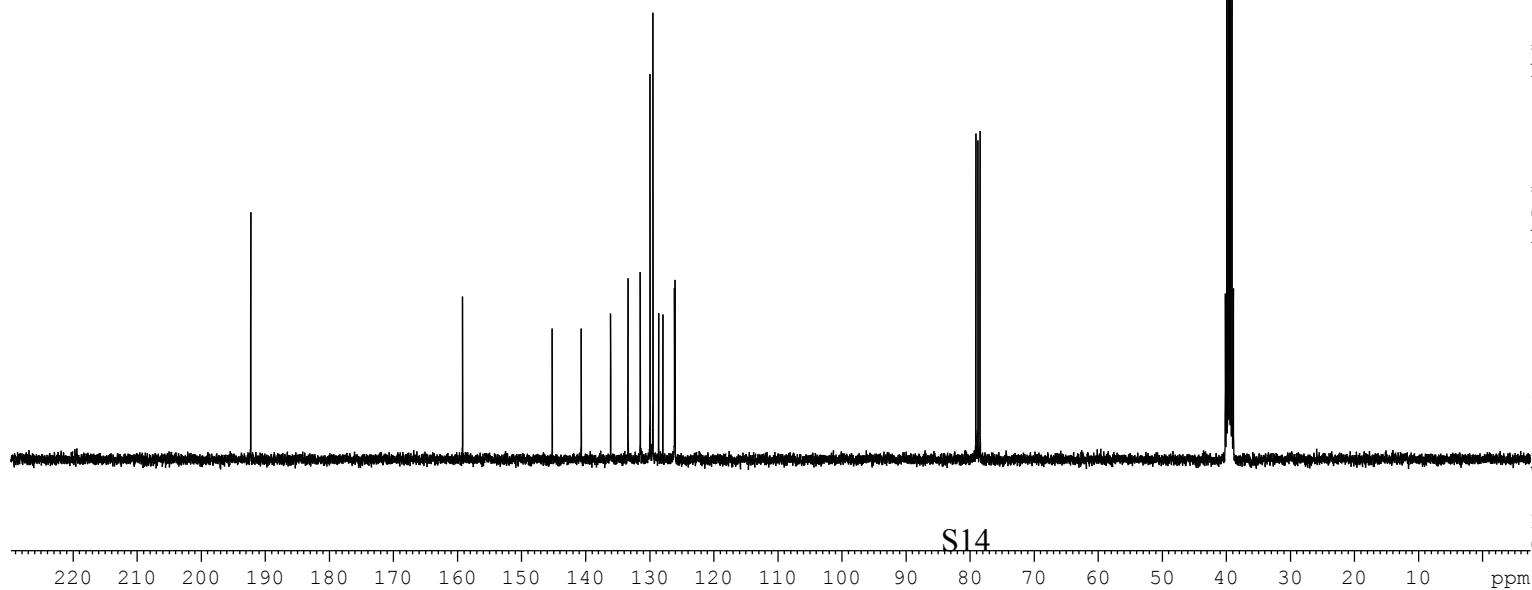

Current Data Parameters  
NAME Jan01-2015  
EXPNO 101  
PROCNO 1

F2 - Acquisition Parameters  
Date\_ 20150101  
Time\_ 16.00  
INSTRUM spect  
PROBHD 5 mm PABBO BB-  
PULPROG zgpg30  
TD 65536  
SOLVENT DMSO  
NS 512  
DS 4  
SWH 29761.904 Hz  
FIDRES 0.454131 Hz  
AQ 1.1010548 sec  
RG 1030  
DW 16.800 usec  
DE 6.00 usec  
TE 293.8 K  
D1 2.00000000 sec  
d11 0.03000000 sec  
DELTA 1.89999998 sec  
TD0 1

==== CHANNEL f1 =====  
NUC1 13C  
P1 9.60 usec  
PL1 -2.00 dB  
SFO1 100.6228298 MHz

==== CHANNEL f2 =====  
CPDPRG2 waltz16  
NUC2 1H  
PCPD2 80.00 usec  
PL2 -3.00 dB  
PL12 14.31 dB  
PL13 18.00 dB  
SFO2 400.1316005 MHz

F2 - Processing parameters  
SI 32768  
SF 100.6128193 MHz  
WDW EM  
SSB 0  
LB 1.00 Hz  
GB 0  
PC 1.40

avtar\_saifpu@yahoo.co.in

GRD-10

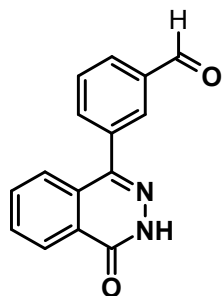

**5f**

Molecular Weight =250.26  
Molecular Formula =C15H10N2O2

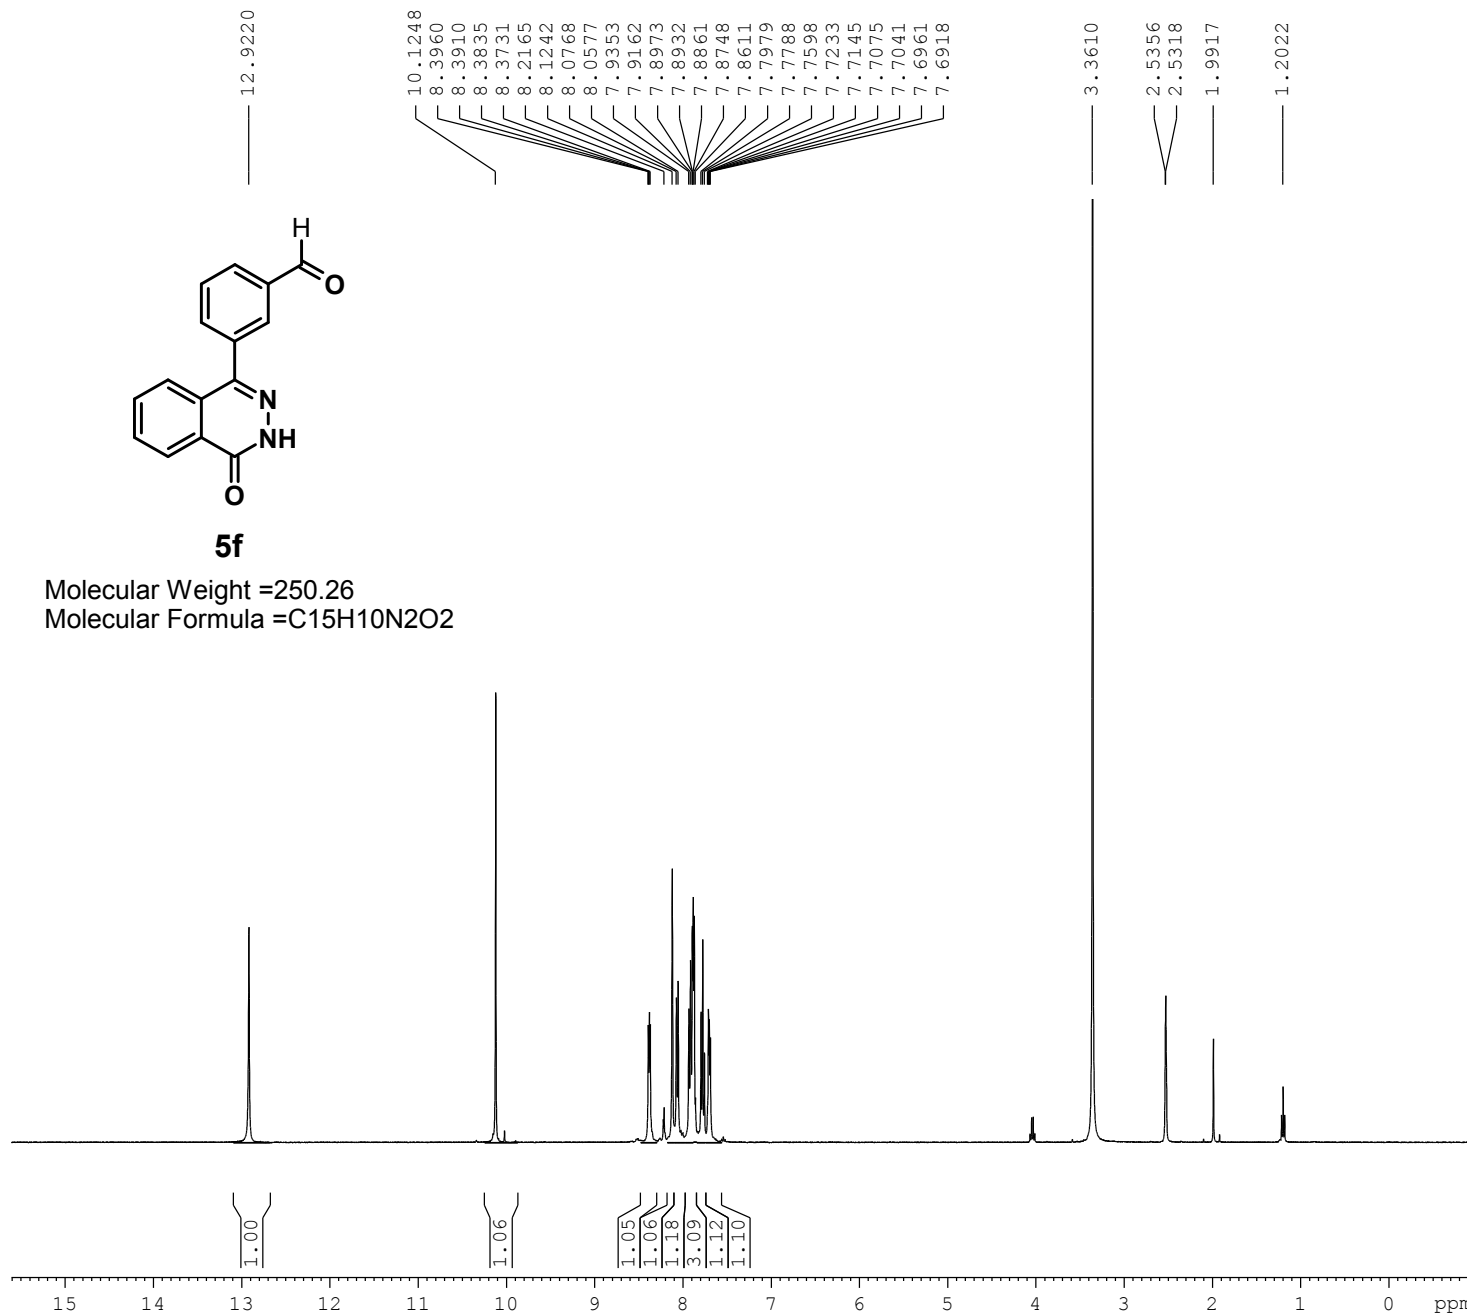

BRUKER  
AVANCE II 400 NMR  
Spectrometer  
SAIF  
Panjab University  
Chandigarh

Current Data Parameters  
NAME Nov29-2014  
EXPNO 240  
PROCNO 1

F2 - Acquisition Parameters  
Date\_ 20141130  
Time\_ 3.44  
INSTRUM spect  
PROBHD 5 mm PABBO BB-  
PULPROG zg30  
TD 65536  
SOLVENT DMSO  
NS 16  
DS 2  
SWH 12019.230 Hz  
FIDRES 0.183399 Hz  
AQ 2.7263477 sec  
RG 322  
DW 41.600 usec  
DE 6.00 usec  
TE 296.0 K  
D1 1.00000000 sec  
TD0 1

==== CHANNEL f1 =====  
NUC1 1H  
P1 10.90 usec  
PL1 -3.00 dB  
SFO1 400.1324710 MHz

F2 - Processing parameters  
SI 32768  
SF 400.1299909 MHz  
WDW EM  
SSB 0  
LB 0.30 Hz  
GB 0  
PC 1.00

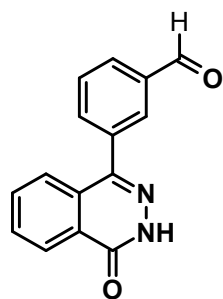

**5f**

Molecular Weight =250.26  
Molecular Formula =C15H10N2O2

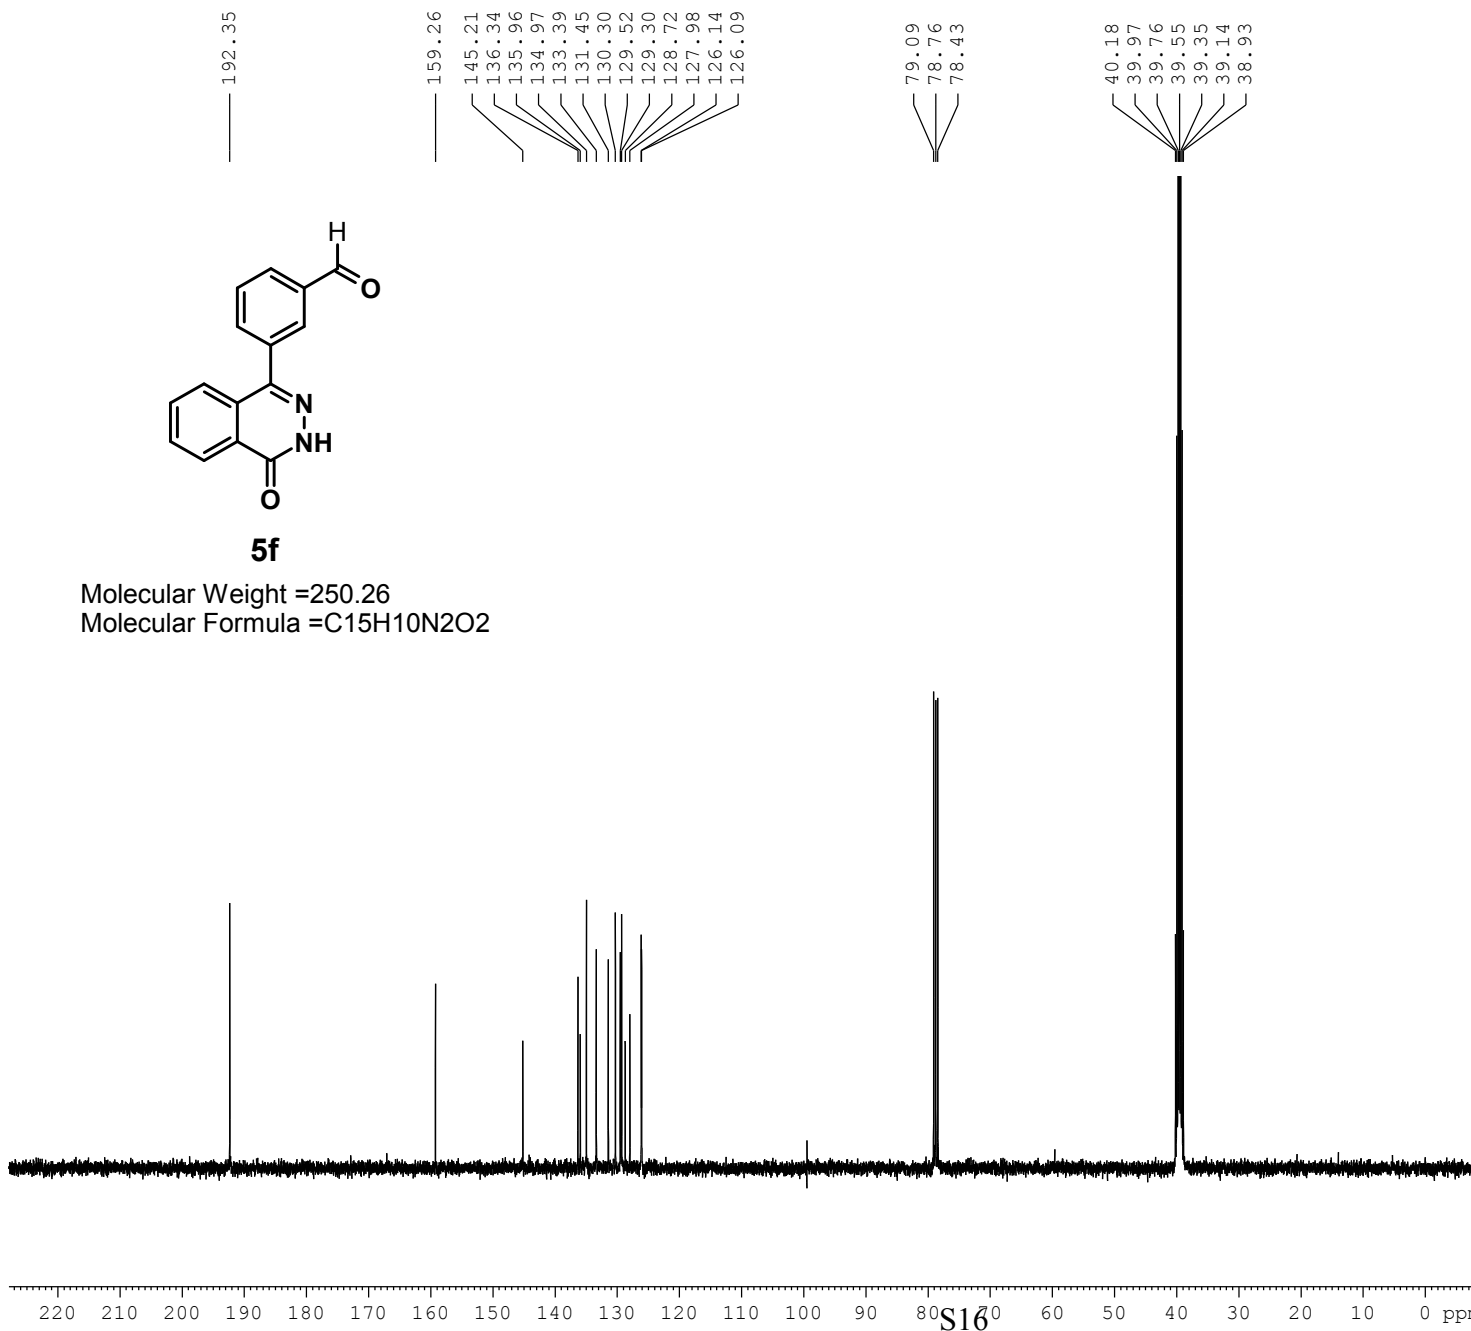

BRUKER  
AVANCE II 400 NMR  
Spectrometer  
SAIF  
Panjab University  
Chandigarh

```

Current Data Parameters
NAME          Nov29-2014
EXPNO         241
PROCNO        1

F2 - Acquisition Parameters
Date_         20141130
Time          4.40
INSTRUM       spect
PROBHD        5 mm PABBO BB-
PULPROG       zgpg30
TD            65536
SOLVENT       DMSO
NS            1024
DS            4
SWH           29761.904 Hz
FIDRES        0.454131 Hz
AQ            1.1010548 sec
RG            36
DW            16.800 usec
DE            6.00 usec
TE            296.4 K
D1            2.00000000 sec
d11           0.03000000 sec
DELTA         1.89999998 sec
TD0           1

===== CHANNEL f1 =====
NUC1           13C
P1             9.60 usec
PL1            -2.00 dB
SFO1           100.6228298 MHz

===== CHANNEL f2 =====
CPDPRG2       waltz16
NUC2           1H
PCPD2          80.00 usec
PL2            -3.00 dB
PL12           14.31 dB
PL13           18.00 dB
SFO2           400.1316005 MHz

F2 - Processing parameters
SI            32768
SF            100.6128193 MHz
WDW           EM
SSB           0
LB            1.00 Hz
GB            0
PC            1.40
    
```



GRD-11

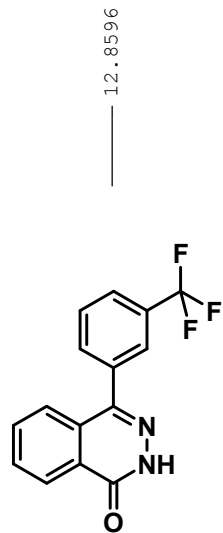

5g

Molecular Weight =290.25  
Molecular Formula =C15H9F3N2O

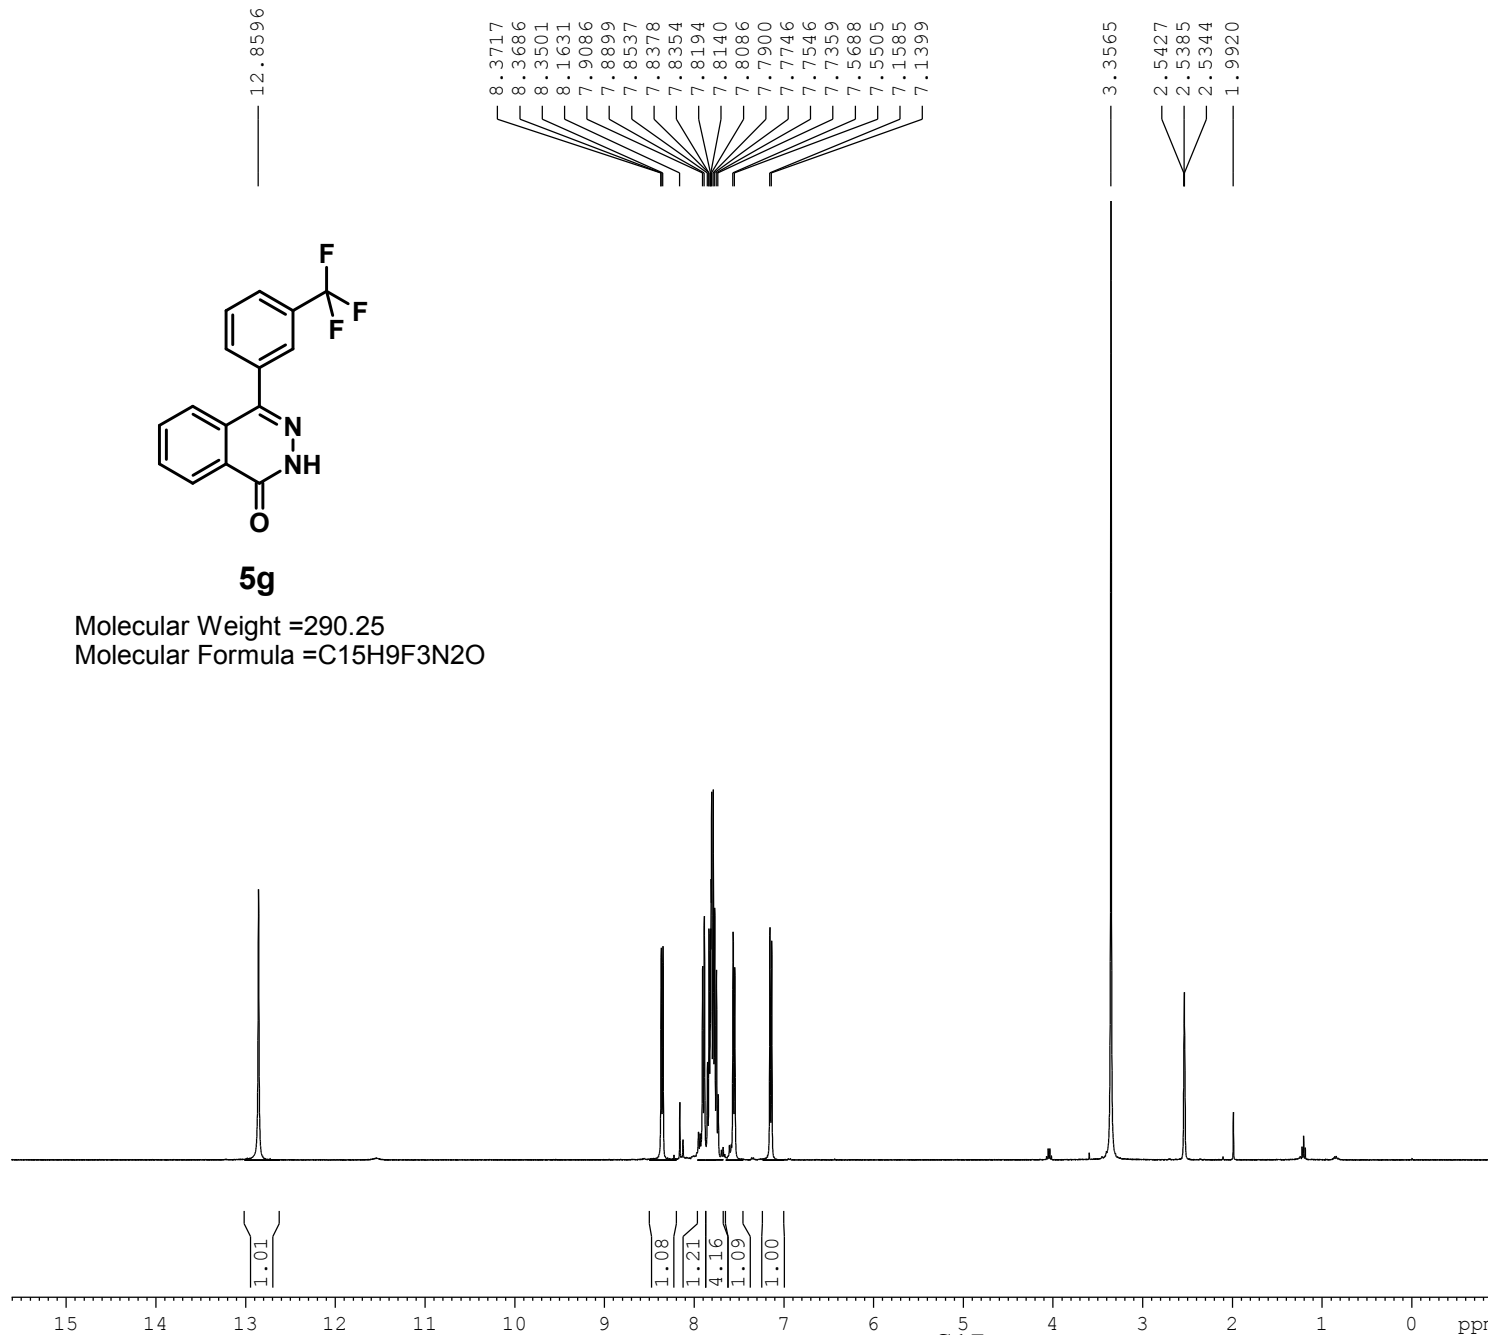

BRUKER  
AVANCE II 400 NMR  
Spectrometer  
SAIF  
Panjab University  
Chandigarh

Current Data Parameters  
NAME Nov29-2014  
EXPNO 250  
PROCNO 1

F2 - Acquisition Parameters  
Date\_ 20141130  
Time\_ 4.45  
INSTRUM spect  
PROBHD 5 mm PABBO BB-  
PULPROG zg30  
TD 65536  
SOLVENT DMSO  
NS 16  
DS 2  
SWH 12019.230 Hz  
FIDRES 0.183399 Hz  
AQ 2.7263477 sec  
RG 362  
DW 41.600 usec  
DE 6.00 usec  
TE 296.0 K  
D1 1.0000000 sec  
TD0 1

==== CHANNEL f1 =====  
NUC1 1H  
P1 10.90 usec  
PL1 -3.00 dB  
SFO1 400.1324710 MHz

F2 - Processing parameters  
SI 32768  
SF 400.1299884 MHz  
WDW EM  
SSB 0  
LB 0.30 Hz  
GB 0  
PC 1.00

S17

avtar\_saifpu@yahoo.co.in

GRD-11

BRUKER  
AVANCE II 400 NMR  
Spectrometer  
SAIF  
Panjab University  
Chandigarh

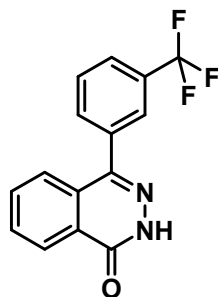

5g

Molecular Weight =290.25  
Molecular Formula =C15H9F3N2O

159.30  
144.21  
133.14  
132.04  
131.70  
131.33  
129.99  
129.46  
128.80  
128.50  
127.52  
126.40  
126.35  
126.31  
126.04  
125.73  
124.99  
122.27

78.98  
78.65  
78.32

40.20  
39.99  
39.78  
39.57  
39.36  
39.16  
38.95

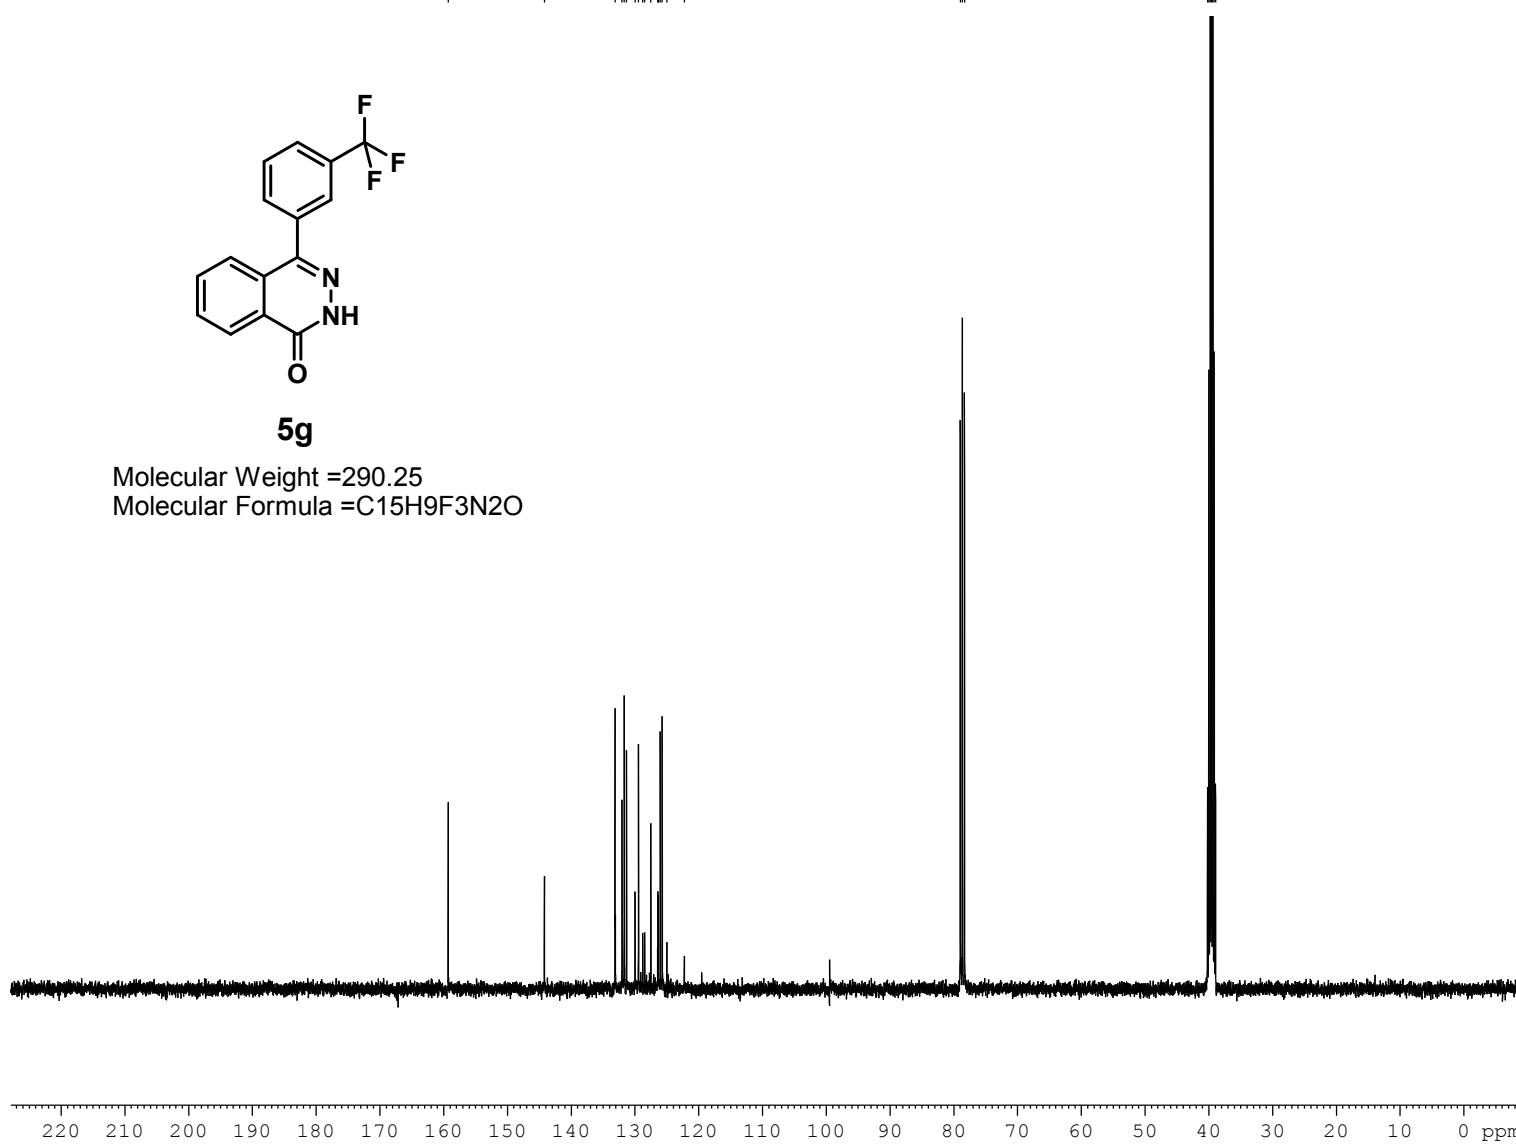

Current Data Parameters  
NAME Nov29-2014  
EXPNO 251  
PROCNO 1

F2 - Acquisition Parameters  
Date\_ 20141130  
Time\_ 5.41  
INSTRUM spect  
PROBHD 5 mm PABBO BB-  
PULPROG zgpg30  
TD 65536  
SOLVENT DMSO  
NS 1024  
DS 4  
SWH 29761.904 Hz  
FIDRES 0.454131 Hz  
AQ 1.1010548 sec  
RG 36  
DW 16.800 usec  
DE 6.00 usec  
TE 296.3 K  
D1 2.0000000 sec  
d11 0.03000000 sec  
DELTA 1.89999998 sec  
TDO 1

==== CHANNEL f1 =====  
NUC1 13C  
P1 9.60 usec  
PL1 -2.00 dB  
SFO1 100.6228298 MHz

==== CHANNEL f2 =====  
CPDPRG2 waltz16  
NUC2 1H  
PCPD2 80.00 usec  
PL2 -3.00 dB  
PL12 14.31 dB  
PL13 18.00 dB  
SFO2 400.1316005 MHz

F2 - Processing parameters  
SI 32768  
SF 100.6128193 MHz  
WDW EM  
SSB 0  
LB 1.00 Hz  
GB 0  
PC 1.40

S18

avtar\_saifpu@yahoo.co.in

SRD-V

12.8873

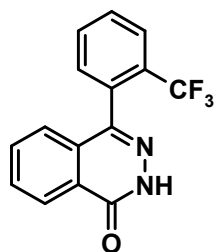

5h

Molecular Weight =236.28  
Molecular Formula =C<sub>15</sub>H<sub>12</sub>N<sub>2</sub>O

8.3696  
8.3662  
8.3496  
8.3473  
8.2059  
7.9198  
7.9012  
7.8666  
7.8641  
7.8485  
7.8458  
7.8301  
7.8254  
7.8199  
7.8012  
7.7859  
7.7833  
7.7649  
7.7462  
7.5851  
7.5666  
7.1588  
7.1400

3.3806

2.5399  
2.5355  
2.5313

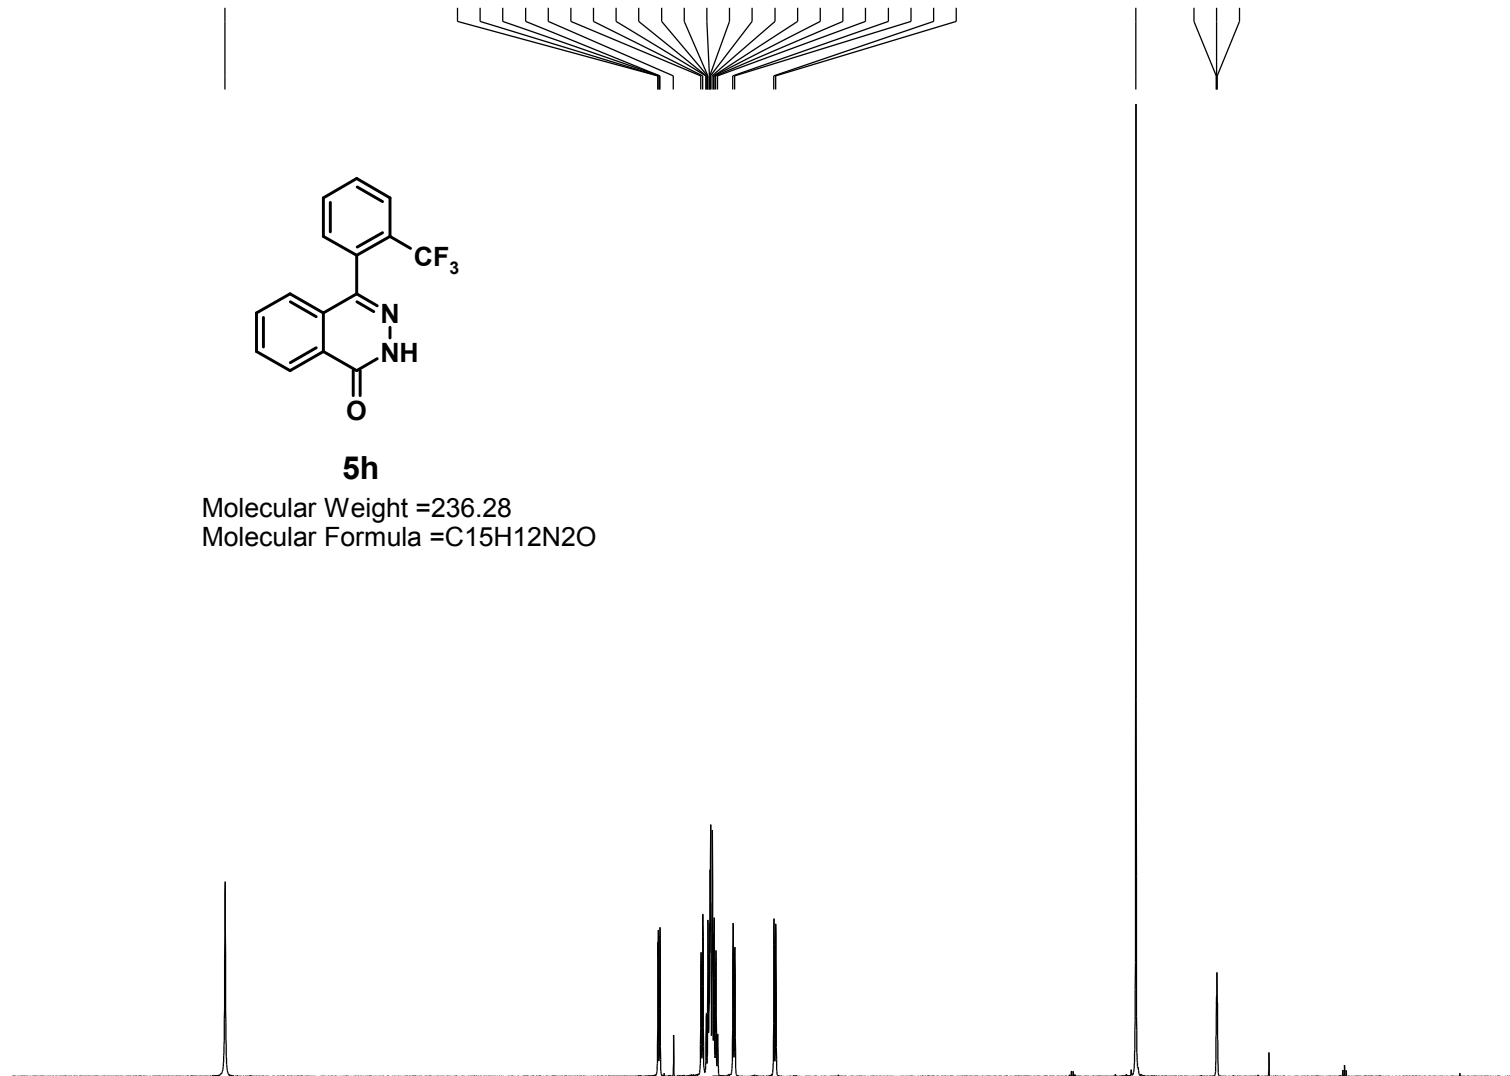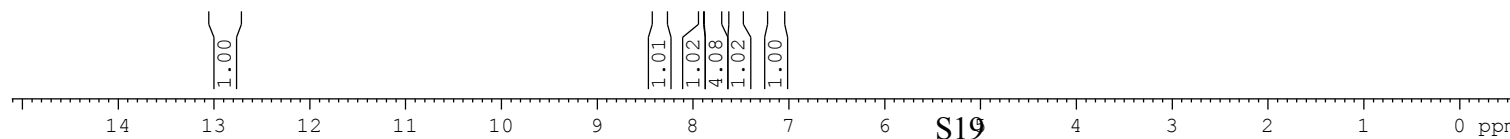

BRUKER  
AVANCE II 400 NMR  
Spectrometer  
SAIF  
Panjab University  
Chandigarh

Current Data Parameters  
NAME Jan01-2015  
EXPNO 110  
PROCNO 1

F2 - Acquisition Parameters  
Date\_ 20150101  
Time 16.29  
INSTRUM spect  
PROBHD 5 mm PABBO BB-  
PULPROG zg30  
TD 65536  
SOLVENT DMSO  
NS 8  
DS 2  
SWH 12019.230 Hz  
FIDRES 0.183399 Hz  
AQ 2.7263477 sec  
RG 724  
DW 41.600 usec  
DE 6.00 usec  
TE 293.5 K  
D1 1.00000000 sec  
TD0 1

==== CHANNEL f1 =====  
NUC1 1H  
P1 10.90 usec  
PL1 -3.00 dB  
SFO1 400.1324710 MHz

F2 - Processing parameters  
SI 32768  
SF 400.1299893 MHz  
WDW EM  
SSB 0  
LB 0.30 Hz  
GB 0  
PC 1.00

S19

avtar\_saifpu@yahoo.co.in

SRD-V

BRUKER  
AVANCE II 400 NMR  
Spectrometer  
SAIF  
Panjab University  
Chandigarh

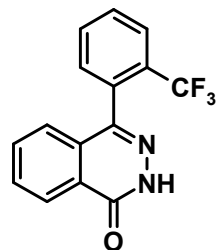

5h

Molecular Weight =236.28  
Molecular Formula =C<sub>15</sub>H<sub>12</sub>N<sub>2</sub>O

159.29  
144.22  
133.23  
133.10  
133.08  
132.14  
131.75  
131.42  
129.99  
129.54  
128.73  
128.43  
127.50  
126.44  
126.39  
126.07  
125.75  
125.03  
122.31

79.06  
78.73  
78.40

40.16  
39.96  
39.75  
39.54  
39.33  
39.12  
38.91

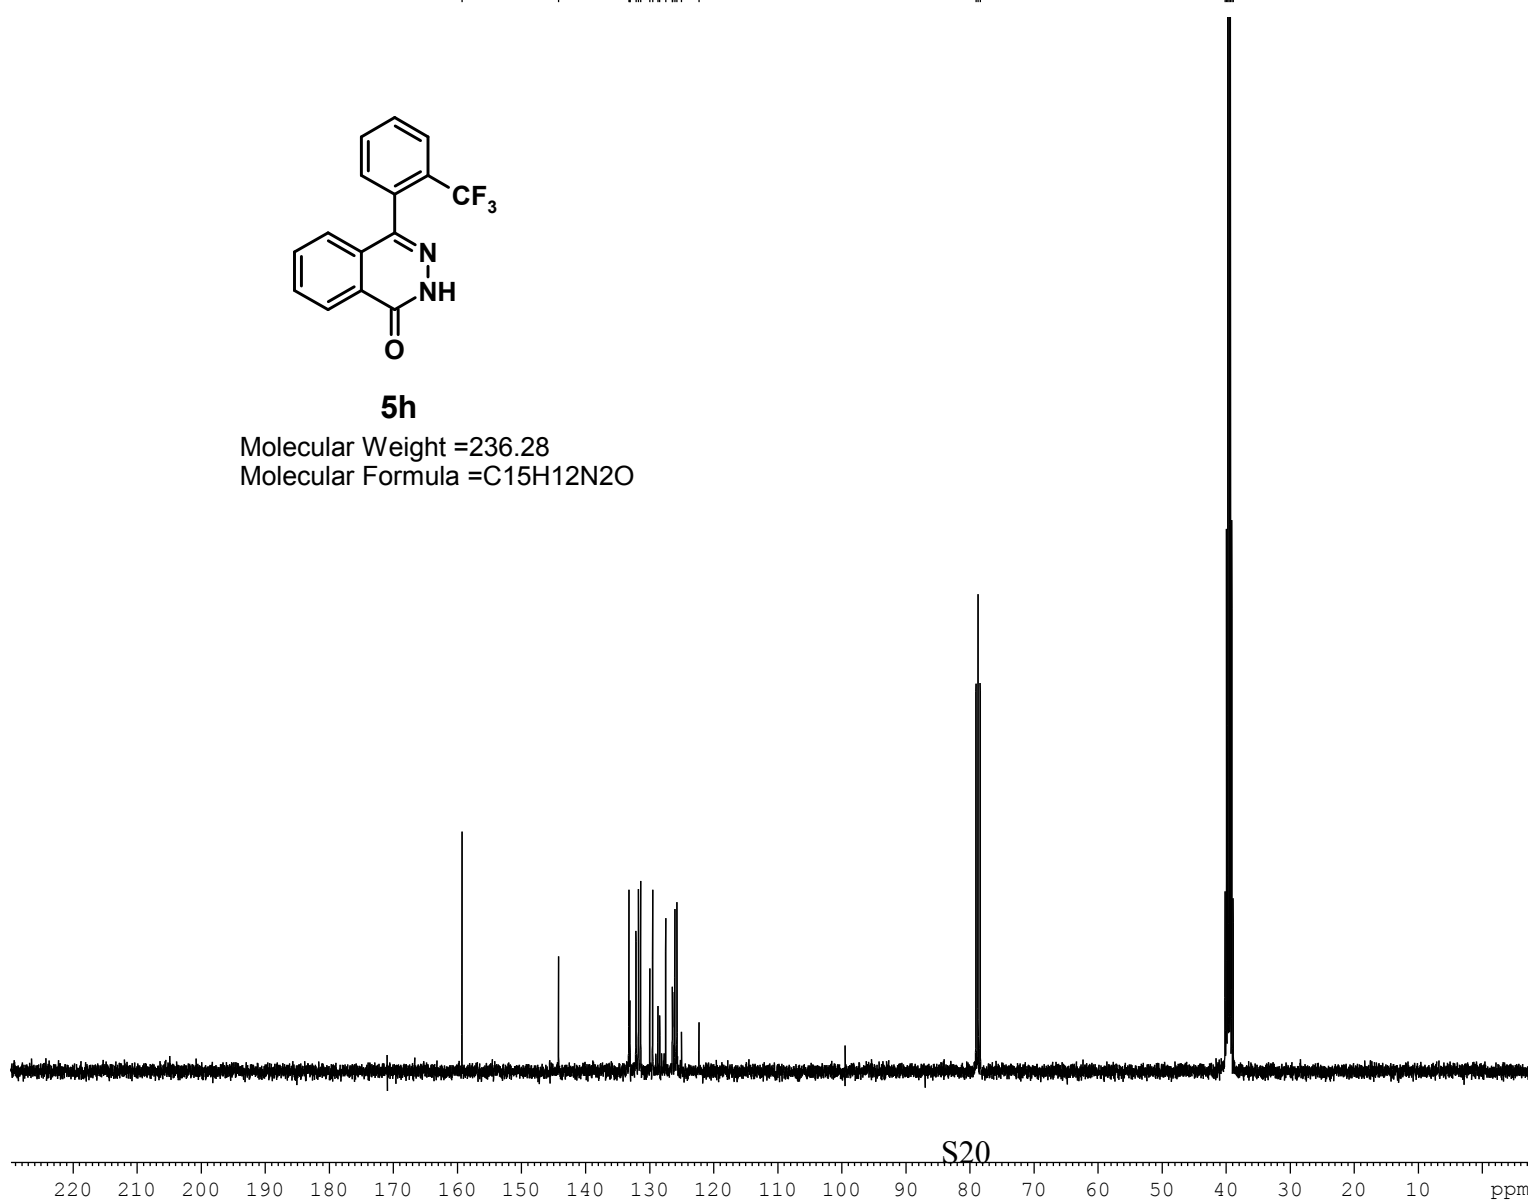

Current Data Parameters  
NAME Jan01-2015  
EXPNO 111  
PROCNO 1

F2 - Acquisition Parameters  
Date\_ 20150101  
Time\_ 16.58  
INSTRUM spect  
PROBHD 5 mm PABBO BB-  
PULPROG zgpg30  
TD 65536  
SOLVENT DMSO  
NS 512  
DS 4  
SWH 29761.904 Hz  
FIDRES 0.454131 Hz  
AQ 1.1010548 sec  
RG 32  
DW 16.800 usec  
DE 6.00 usec  
TE 293.6 K  
D1 2.00000000 sec  
d11 0.03000000 sec  
DELTA 1.899999998 sec  
TD0 1

==== CHANNEL f1 =====  
NUC1 13C  
P1 9.60 usec  
PL1 -2.00 dB  
SFO1 100.6228298 MHz

==== CHANNEL f2 =====  
CPDPRG2 waltz16  
NUC2 1H  
PCPD2 80.00 usec  
PL2 -3.00 dB  
PL12 14.31 dB  
PL13 18.00 dB  
SFO2 400.1316005 MHz

F2 - Processing parameters  
SI 32768  
SF 100.6128193 MHz  
WDW EM  
SSB 0  
LB 1.00 Hz  
GB 0  
PC 1.40

avtar\_saifpu@yahoo.co.in

GRD-06

BRUKER  
AVANCE II 400 NMR  
Spectrometer  
SAIF  
Panjab University  
Chandigarh

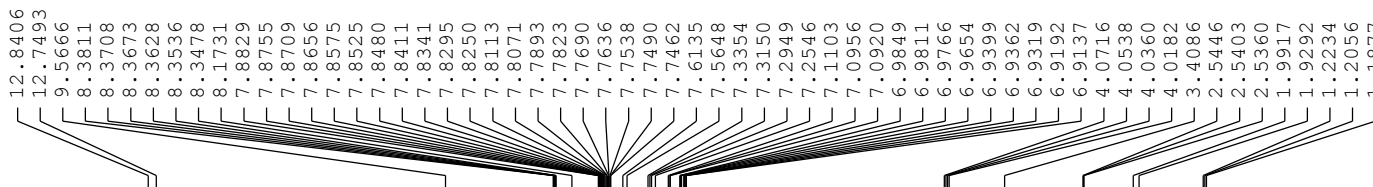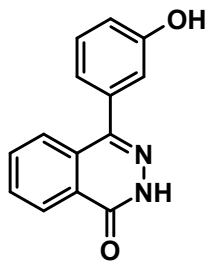

5i

Molecular Weight =238.25  
Molecular Formula =C<sub>14</sub>H<sub>10</sub>N<sub>2</sub>O<sub>2</sub>

Current Data Parameters  
NAME Nov29-2014  
EXPNO 210  
PROCNO 1

F2 - Acquisition Parameters  
Date\_ 20141130  
Time 0.41  
INSTRUM spect  
PROBHD 5 mm PABBO BB-  
PULPROG zg30  
TD 65536  
SOLVENT DMSO  
NS 16  
DS 2  
SWH 12019.230 Hz  
FIDRES 0.183399 Hz  
AQ 2.7263477 sec  
RG 228  
DW 41.600 usec  
DE 6.00 usec  
TE 296.2 K  
D1 1.00000000 sec  
TDO 1

==== CHANNEL f1 =====  
NUC1 1H  
P1 10.90 usec  
PL1 -3.00 dB  
SFO1 400.1324710 MHz

F2 - Processing parameters  
SI 32768  
SF 400.1299876 MHz  
WDW EM  
SSB 0  
LB 0.30 Hz  
GB 0  
PC 1.00

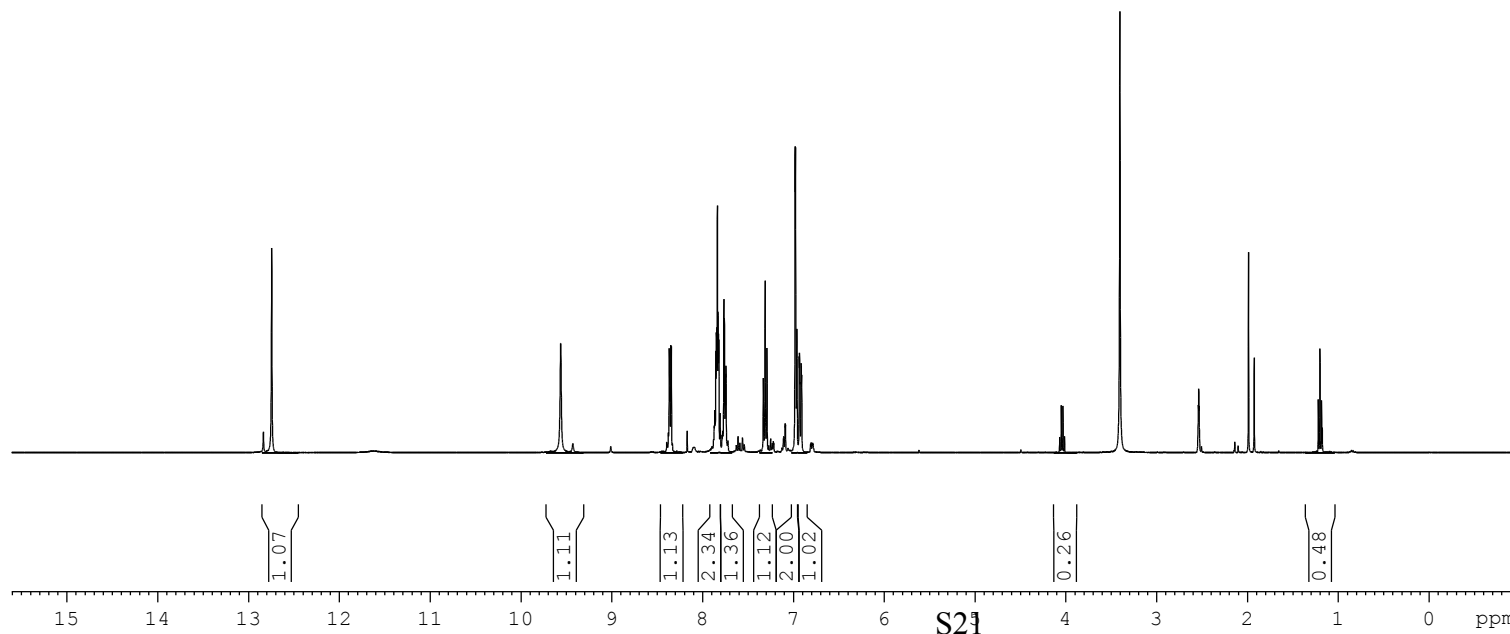

avtar\_saifpu@yahoo.co.in

BRUKER  
AVANCE II 400 NMR  
Spectrometer  
SAIF  
Panjab University  
Chandigarh

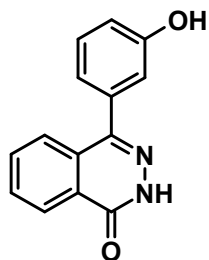

5i

Molecular Weight =238.25  
Molecular Formula =C14H10N2O2

159.28  
157.35  
146.37  
136.16  
133.01  
131.08  
129.21  
129.04  
127.96  
126.44  
125.92  
119.80  
116.10  
115.76  
79.00  
78.68  
78.35  
59.60  
40.17  
39.96  
39.76  
39.55  
39.34  
39.13  
38.92  
13.95

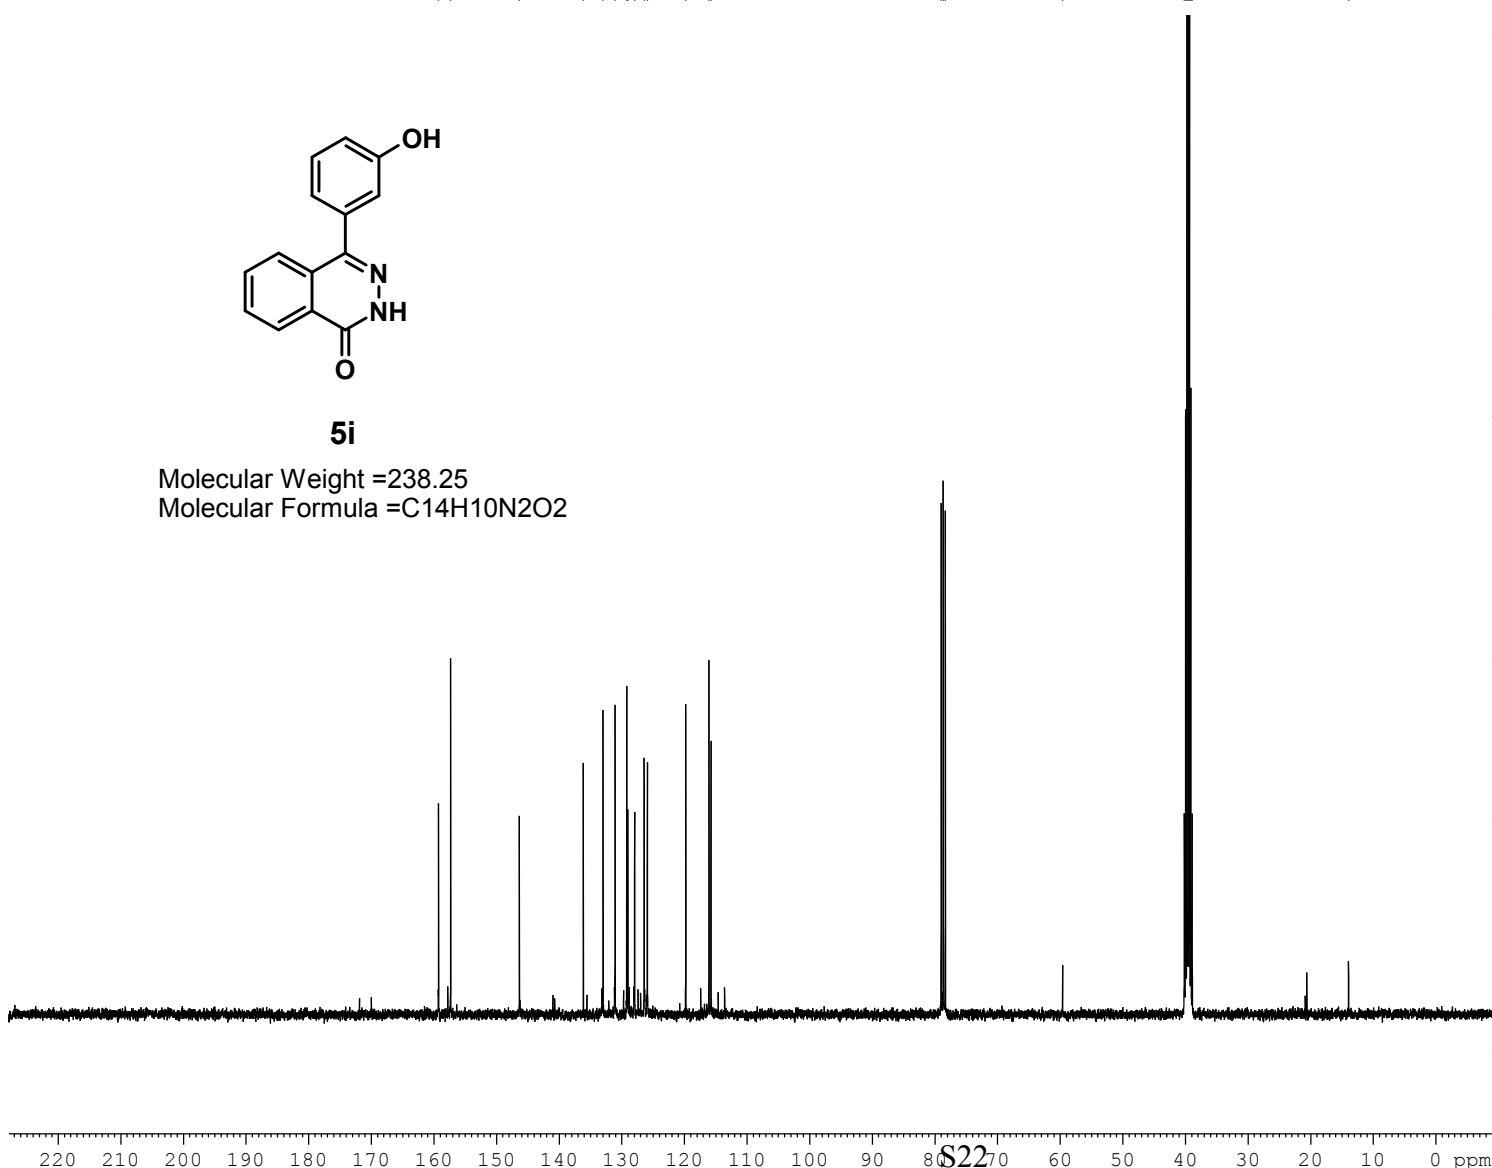

Current Data Parameters  
NAME Nov29-2014  
EXPNO 211  
PROCNO 1  
  
F2 - Acquisition Parameters  
Date\_ 20141130  
Time 1.37  
INSTRUM spect  
PROBHD 5 mm PABBO BB-  
PULPROG zgpg30  
TD 65536  
SOLVENT DMSO  
NS 1024  
DS 4  
SWH 29761.904 Hz  
FIDRES 0.454131 Hz  
AQ 1.1010548 sec  
RG 1030  
DW 16.800 usec  
DE 6.00 usec  
TE 296.6 K  
D1 2.00000000 sec  
d11 0.03000000 sec  
DELTA 1.89999998 sec  
TD0 1

==== CHANNEL f1 =====  
NUC1 13C  
P1 9.60 usec  
PL1 -2.00 dB  
SFO1 100.6228298 MHz

==== CHANNEL f2 =====  
CPDPRG2 waltz16  
NUC2 1H  
PCPD2 80.00 usec  
PL2 -3.00 dB  
PL12 14.31 dB  
PL13 18.00 dB  
SFO2 400.1316005 MHz

F2 - Processing parameters  
SI 32768  
SF 100.6128193 MHz  
WDW EM  
SSB 0  
LB 1.00 Hz  
GB 0  
PC 1.40

BRUKER  
 AVANCE II 400 NMR  
 Spectrometer  
 SAIF  
 Panjab University  
 Chandigarh

Current Data Parameters  
 NAME Jan01-2015  
 EXPNO 140  
 PROCNO 1

F2 - Acquisition Parameters  
 Date\_ 20150101  
 Time\_ 19.17  
 INSTRUM spect  
 PROBHD 5 mm PABBO BB-  
 PULPROG zg30  
 TD 65536  
 SOLVENT DMSO  
 NS 8  
 DS 2  
 SWH 12019.230 Hz  
 FIDRES 0.183399 Hz  
 AQ 2.7263477 sec  
 RG 256  
 DW 41.600 usec  
 DE 6.00 usec  
 TE 293.2 K  
 D1 1.0000000 sec  
 TD0 1

===== CHANNEL f1 =====  
 NUC1 1H  
 P1 10.90 usec  
 PL1 -3.00 dB  
 SFO1 400.1324710 MHz

F2 - Processing parameters  
 SI 32768  
 SF 400.1299908 MHz  
 WDW EM  
 SSB 0  
 LB 0.30 Hz  
 GB 0  
 PC 1.00

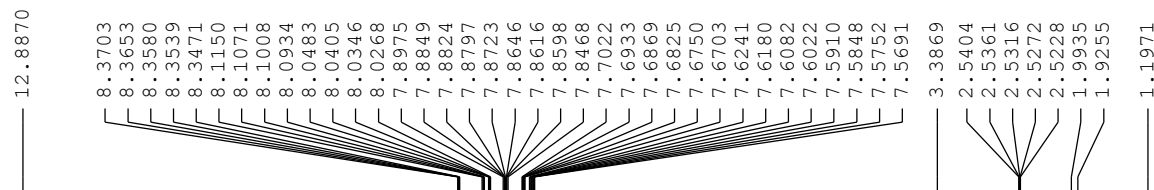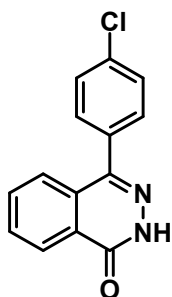

5j

Molecular Weight =256.69  
 Molecular Formula =C<sub>14</sub>H<sub>9</sub>ClN<sub>2</sub>O

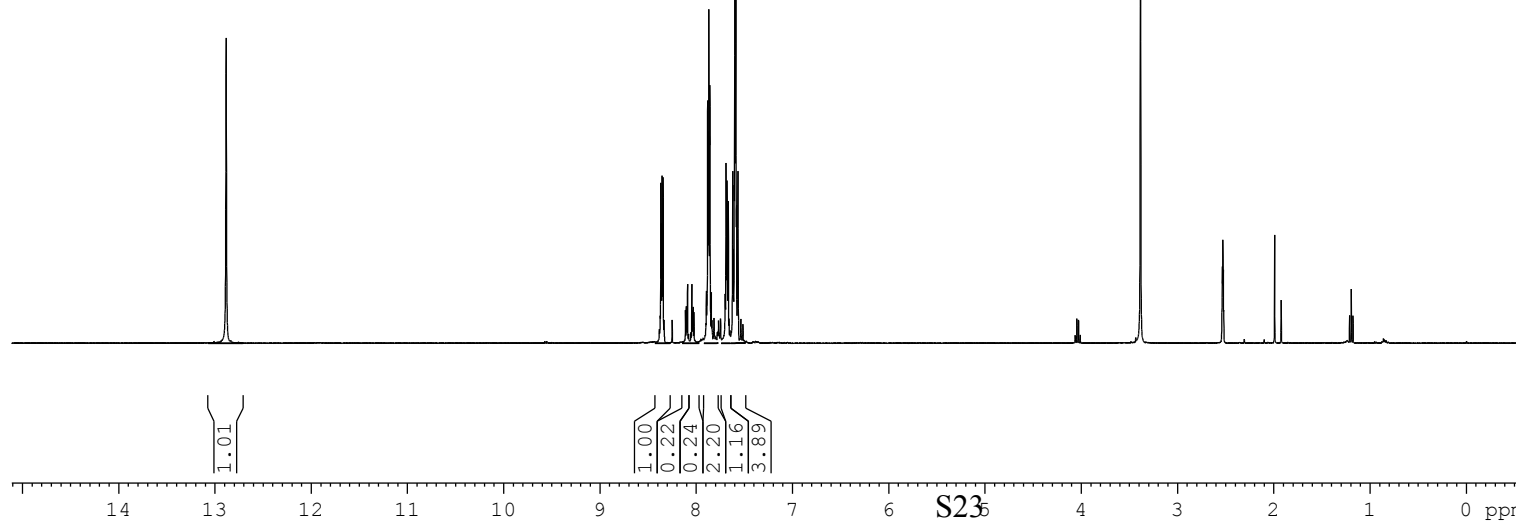

GRD-04

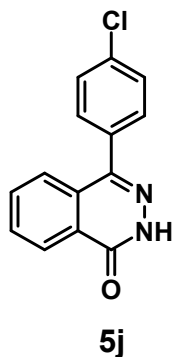

Molecular Weight =256.69  
Molecular Formula =C<sub>14</sub>H<sub>9</sub>ClN<sub>2</sub>O

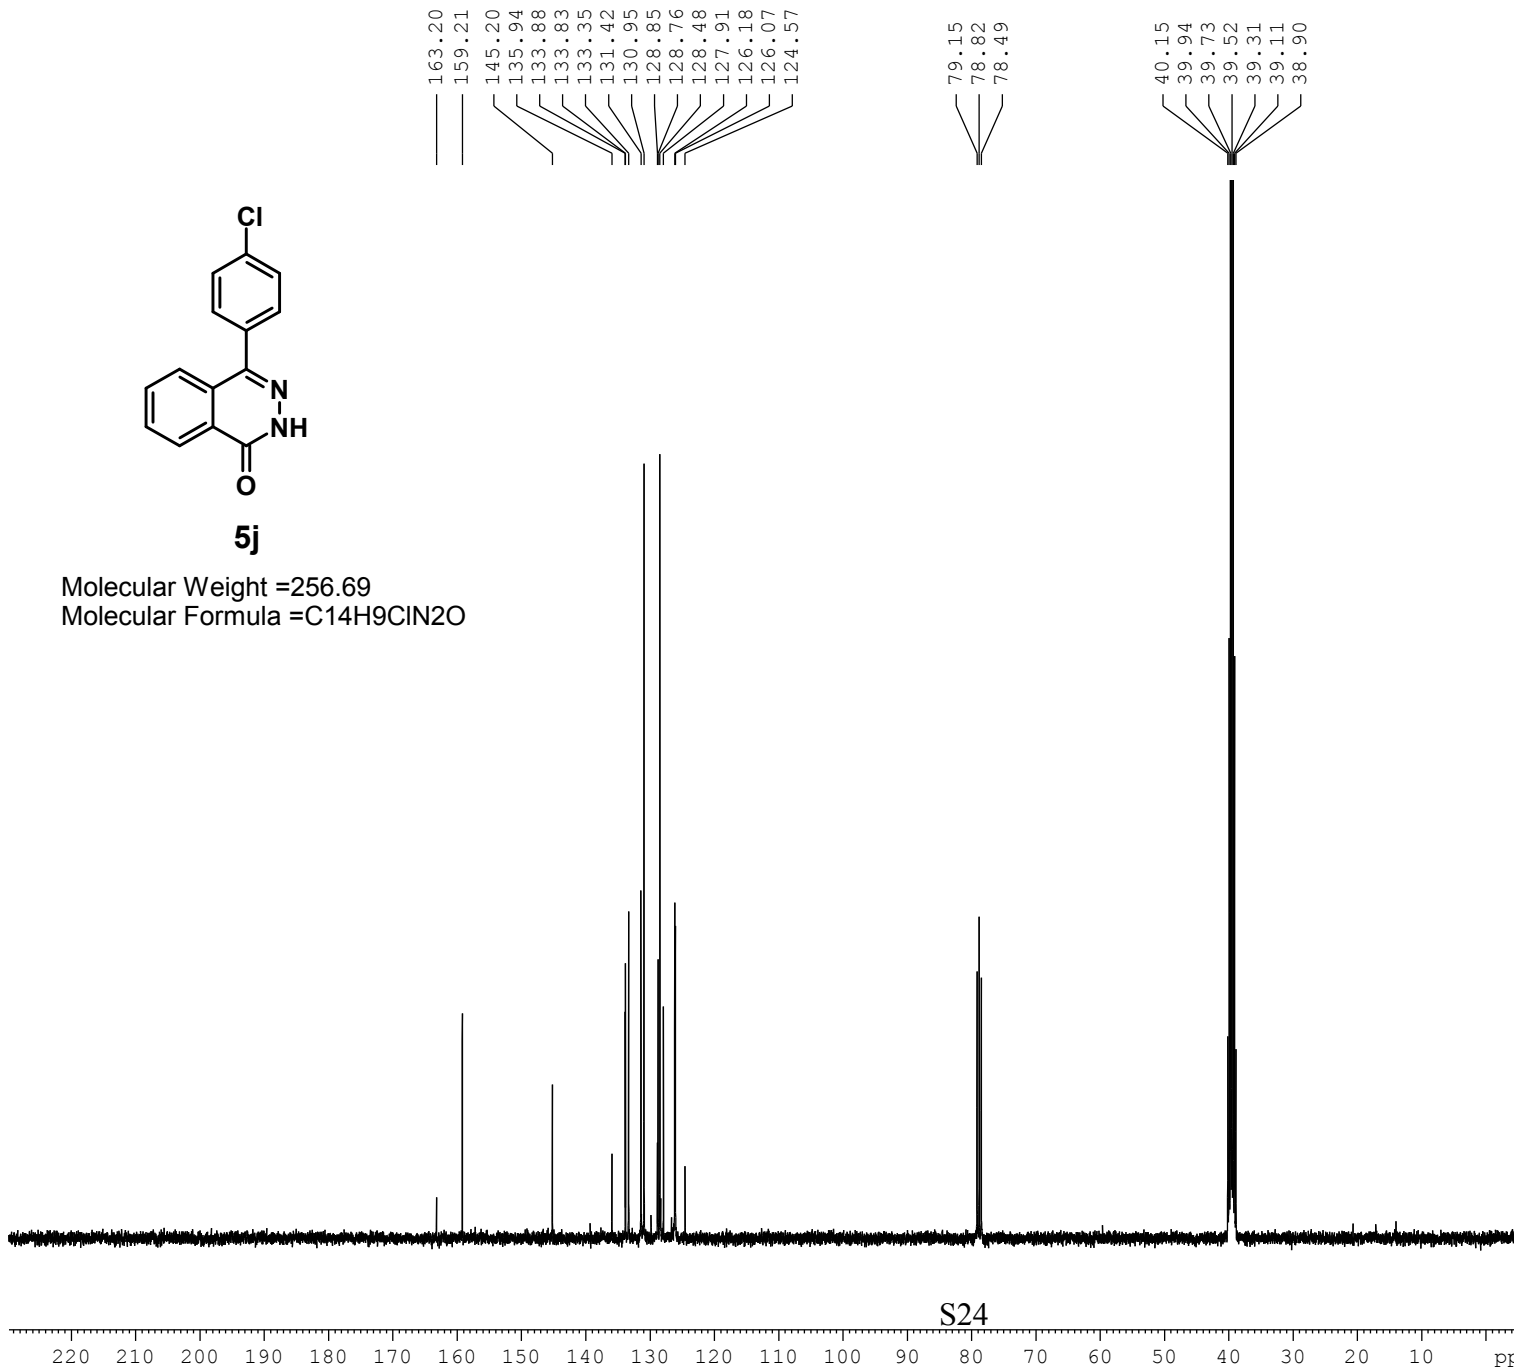

BRUKER  
AVANCE II 400 NMR  
Spectrometer  
SAIF  
Panjab University  
Chandigarh

Current Data Parameters  
NAME Jan01-2015  
EXPNO 141  
PROCNO 1

F2 - Acquisition Parameters  
Date\_ 20150101  
Time\_ 19.47  
INSTRUM spect  
PROBHD 5 mm PABBO BB-  
PULPROG zgpg30  
TD 65536  
SOLVENT DMSO  
NS 512  
DS 4  
SWH 29761.904 Hz  
FIDRES 0.454131 Hz  
AQ 1.1010548 sec  
RG 1150  
DW 16.800 usec  
DE 6.00 usec  
TE 293.7 K  
D1 2.00000000 sec  
d11 0.03000000 sec  
DELTA 1.89999998 sec  
TD0 1

==== CHANNEL f1 =====  
NUC1 13C  
P1 9.60 usec  
PL1 -2.00 dB  
SFO1 100.6228298 MHz

==== CHANNEL f2 =====  
CPDPRG2 waltz16  
NUC2 1H  
PCPD2 80.00 usec  
PL2 -3.00 dB  
PL12 14.31 dB  
PL13 18.00 dB  
SFO2 400.1316005 MHz

F2 - Processing parameters  
SI 32768  
SF 100.6128193 MHz  
WDW EM  
SSB 0  
LB 1.00 Hz  
GB 0  
PC 1.40

avtar\_saifpu@yahoo.co.in



SRD-B  
 PROTON\_DephtChem CDC13 {D:\AHMEDNAGAR} root 20

11.648  
 8.466  
 8.457  
 8.448  
 7.851  
 7.836  
 7.829  
 7.818  
 7.804  
 7.790  
 7.784  
 7.776  
 7.686  
 7.683  
 7.677  
 7.668  
 7.582  
 7.567  
 7.560  
 7.534  
 7.464  
 7.451  
 7.445  
 7.442  
 7.427  
 7.418  
 7.260  
 7.097  
 6.782  
 6.778  
 6.760  
 6.669  
 6.273  
 6.266  
 4.319  
 4.310  
 4.305  
 4.296  
 4.291  
 4.087  
 4.073  
 4.064  
 4.059  
 4.050  
 4.045  
 3.337  
 3.144  
 1.995  
 1.987  
 1.431  
 1.417  
 1.408  
 1.403  
 1.394  
 1.220  
 1.206

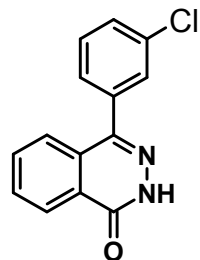

5k

Molecular Weight = 256.69  
 Molecular Formula = C<sub>14</sub>H<sub>9</sub>ClN<sub>2</sub>O

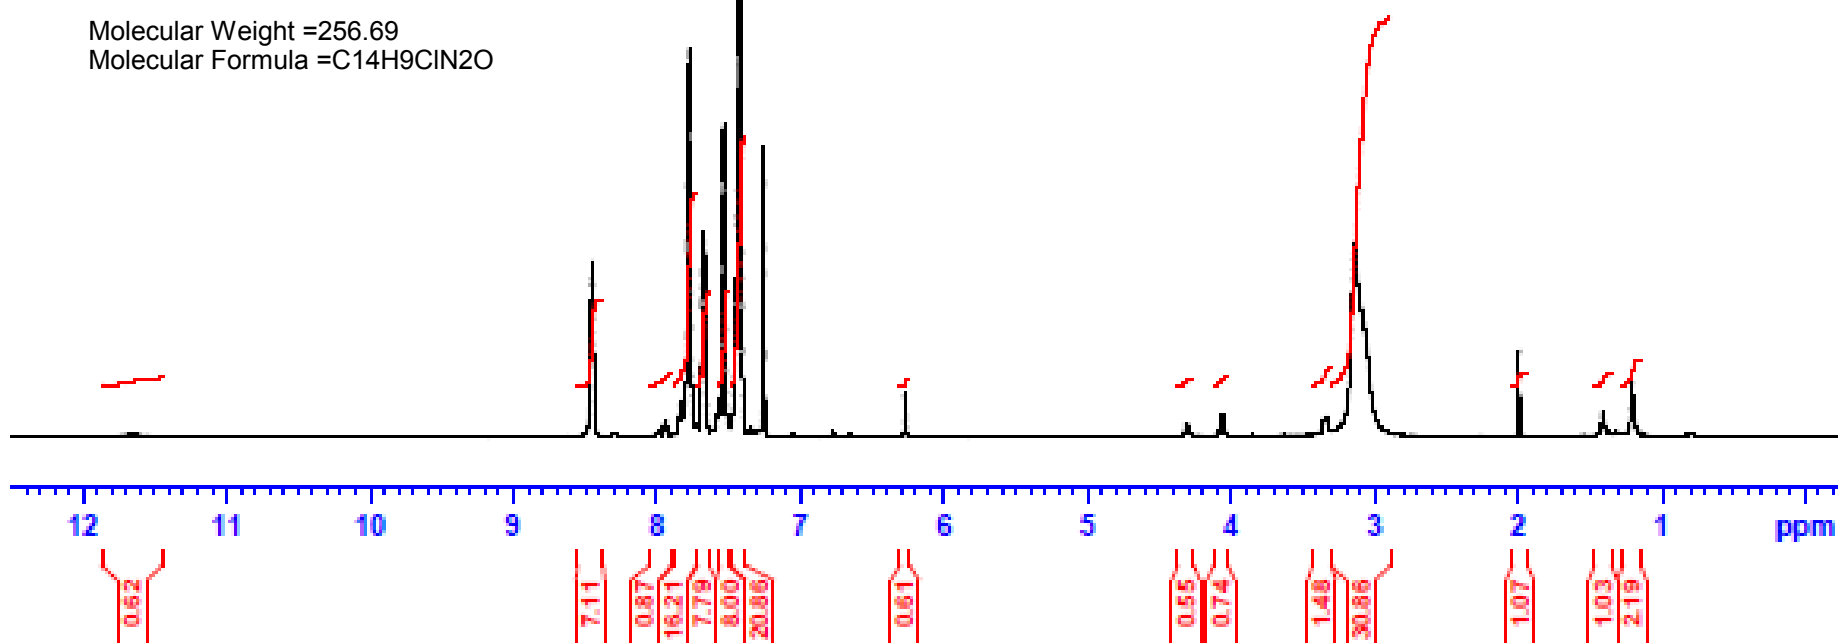

GRD-08

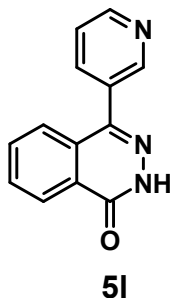

Molecular Weight =223.24  
Molecular Formula =C<sub>13</sub>H<sub>9</sub>N<sub>3</sub>O

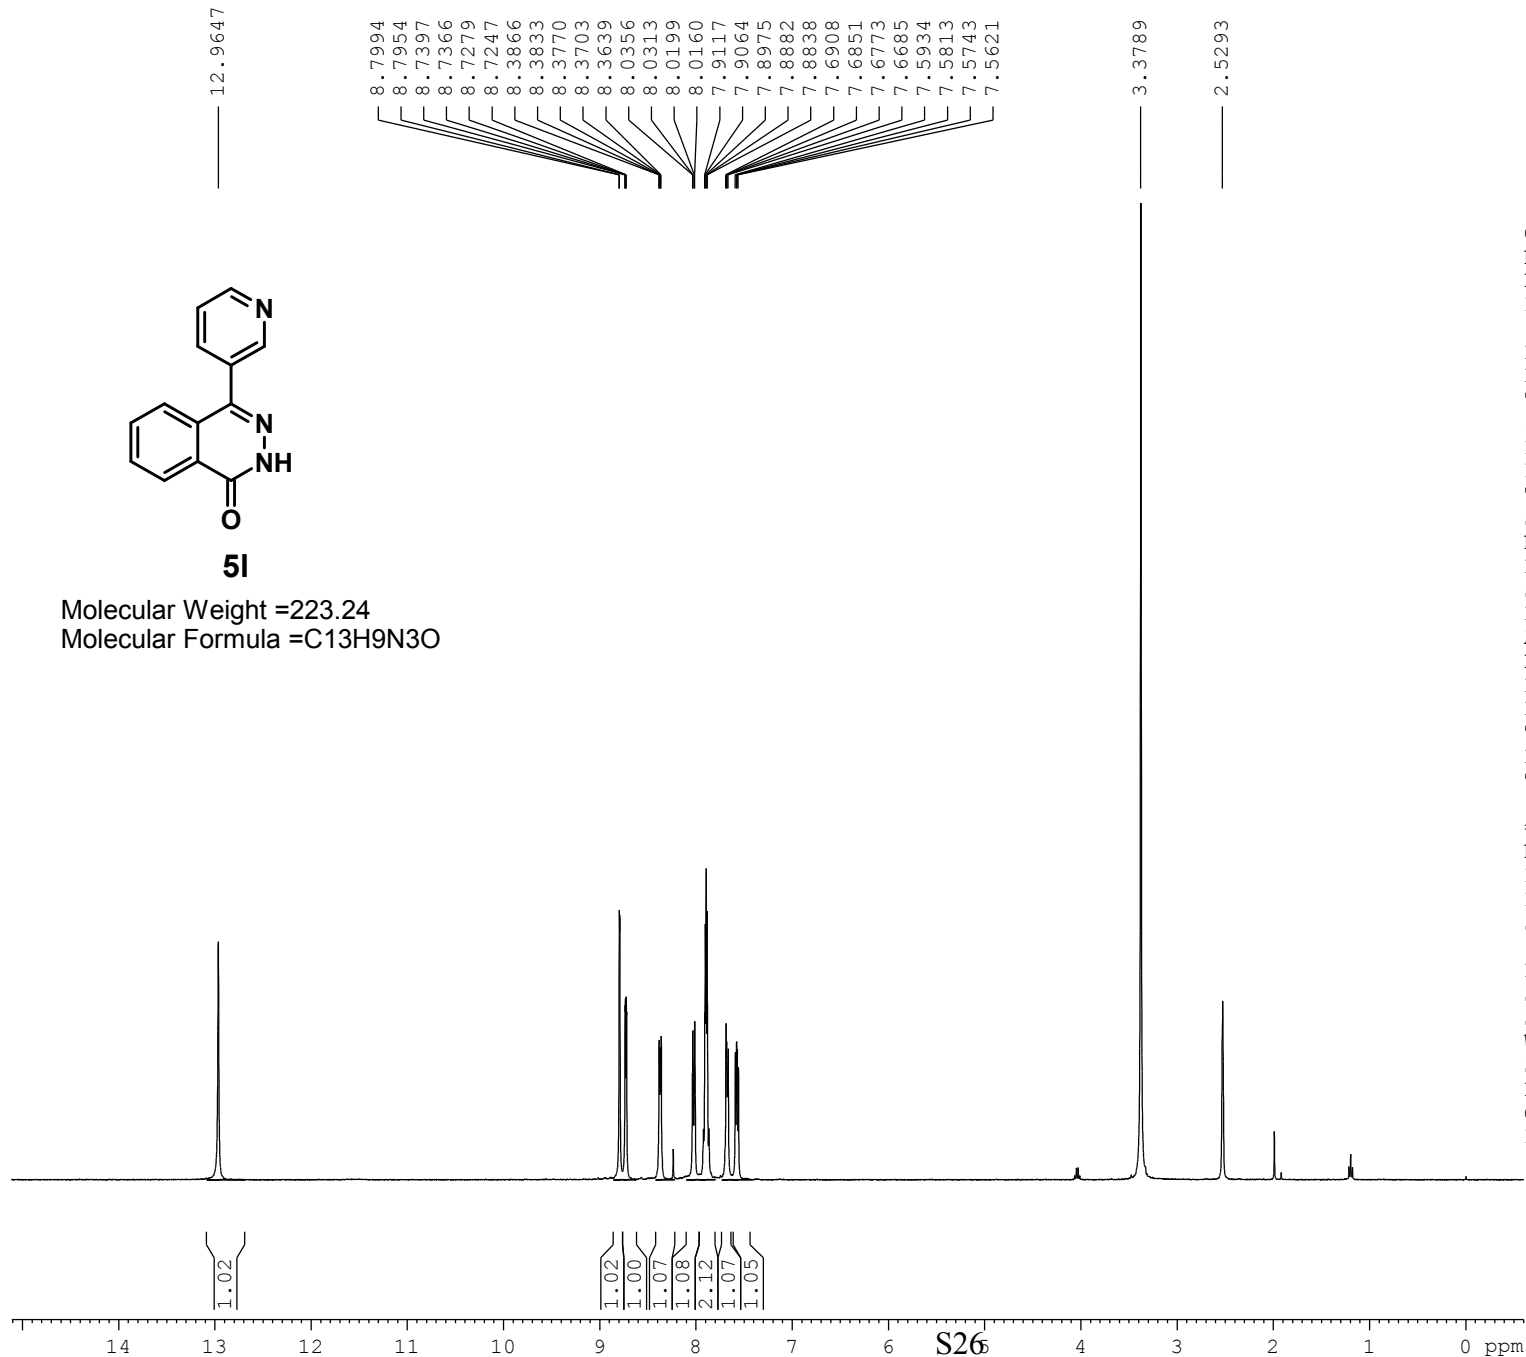

BRUKER  
AVANCE II 400 NMR  
Spectrometer  
SAIF  
Panjab University  
Chandigarh

Current Data Parameters  
NAME Jan01-2015  
EXPNO 160  
PROCNO 1

F2 - Acquisition Parameters  
Date\_ 20150101  
Time\_ 20.25  
INSTRUM spect  
PROBHD 5 mm PABBO BB-  
PULPROG zg30  
TD 65536  
SOLVENT DMSO  
NS 8  
DS 2  
SWH 12019.230 Hz  
FIDRES 0.183399 Hz  
AQ 2.7263477 sec  
RG 512  
DW 41.600 usec  
DE 6.00 usec  
TE 293.3 K  
D1 1.0000000 sec  
TD0 1

==== CHANNEL f1 =====  
NUC1 1H  
P1 10.90 usec  
PL1 -3.00 dB  
SFO1 400.1324710 MHz

F2 - Processing parameters  
SI 32768  
SF 400.1299918 MHz  
WDW EM  
SSB 0  
LB 0.30 Hz  
GB 0  
PC 1.00

BRUKER  
 AVANCE II 400 NMR  
 Spectrometer  
 SAIF  
 Panjab University  
 Chandigarh

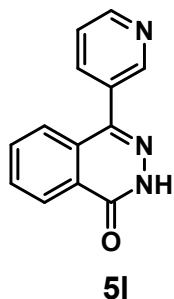

Molecular Weight =223.24  
 Molecular Formula =C<sub>13</sub>H<sub>9</sub>N<sub>3</sub>O

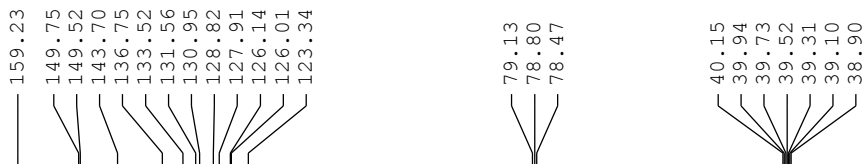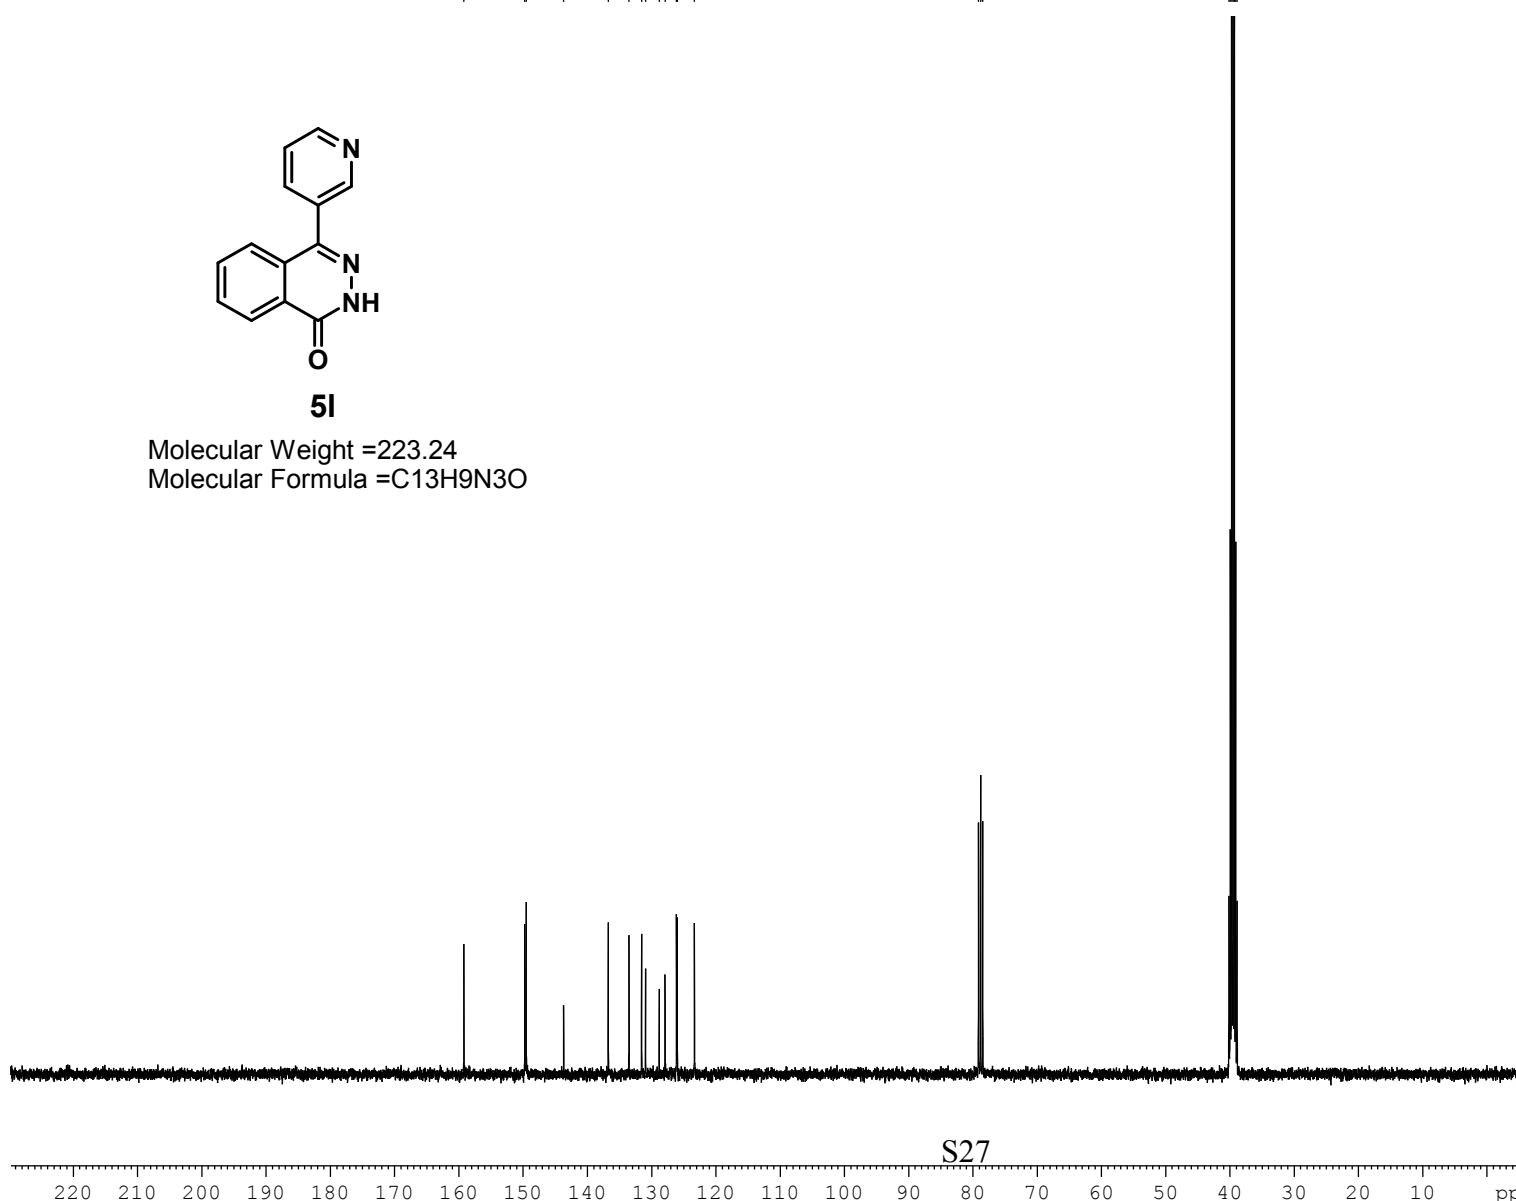

Current Data Parameters  
 NAME Jan01-2015  
 EXPNO 161  
 PROCNO 1

F2 - Acquisition Parameters  
 Date\_ 20150101  
 Time\_ 20.54  
 INSTRUM spect  
 PROBHD 5 mm PABBO BB-  
 PULPROG zgpg30  
 TD 65536  
 SOLVENT DMSO  
 NS 512  
 DS 4  
 SWH 29761.904 Hz  
 FIDRES 0.454131 Hz  
 AQ 1.1010548 sec  
 RG 1030  
 DW 16.800 usec  
 DE 6.00 usec  
 TE 293.6 K  
 D1 2.00000000 sec  
 d11 0.03000000 sec  
 DELTA 1.89999998 sec  
 TD0 1

==== CHANNEL f1 =====  
 NUC1 13C  
 P1 9.60 usec  
 PL1 -2.00 dB  
 SFO1 100.6228298 MHz

==== CHANNEL f2 =====  
 CPDPRG2 waltz16  
 NUC2 1H  
 PCPD2 80.00 usec  
 PL2 -3.00 dB  
 PL12 14.31 dB  
 PL13 18.00 dB  
 SFO2 400.1316005 MHz

F2 - Processing parameters  
 SI 32768  
 SF 100.6128193 MHz  
 WDW EM  
 SSB 0  
 LB 1.00 Hz  
 GB 0  
 PC 1.40

GRD-07

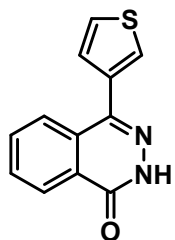

5m

Molecular Weight =228.27  
Molecular Formula =C12H8N2OS

12.7611

8.3637  
8.3457  
8.3427  
8.1860  
7.9284  
7.9244  
7.9047  
7.8879  
7.8844  
7.8683  
7.8635  
7.8579  
7.8438  
7.8398  
7.8271  
7.8225  
7.8128  
7.8102  
7.8055  
7.8030  
7.7608  
7.6534  
7.6486  
7.6412  
7.4058  
7.4033  
7.3937  
7.3907

3.3681

2.5402  
2.5360  
2.5317

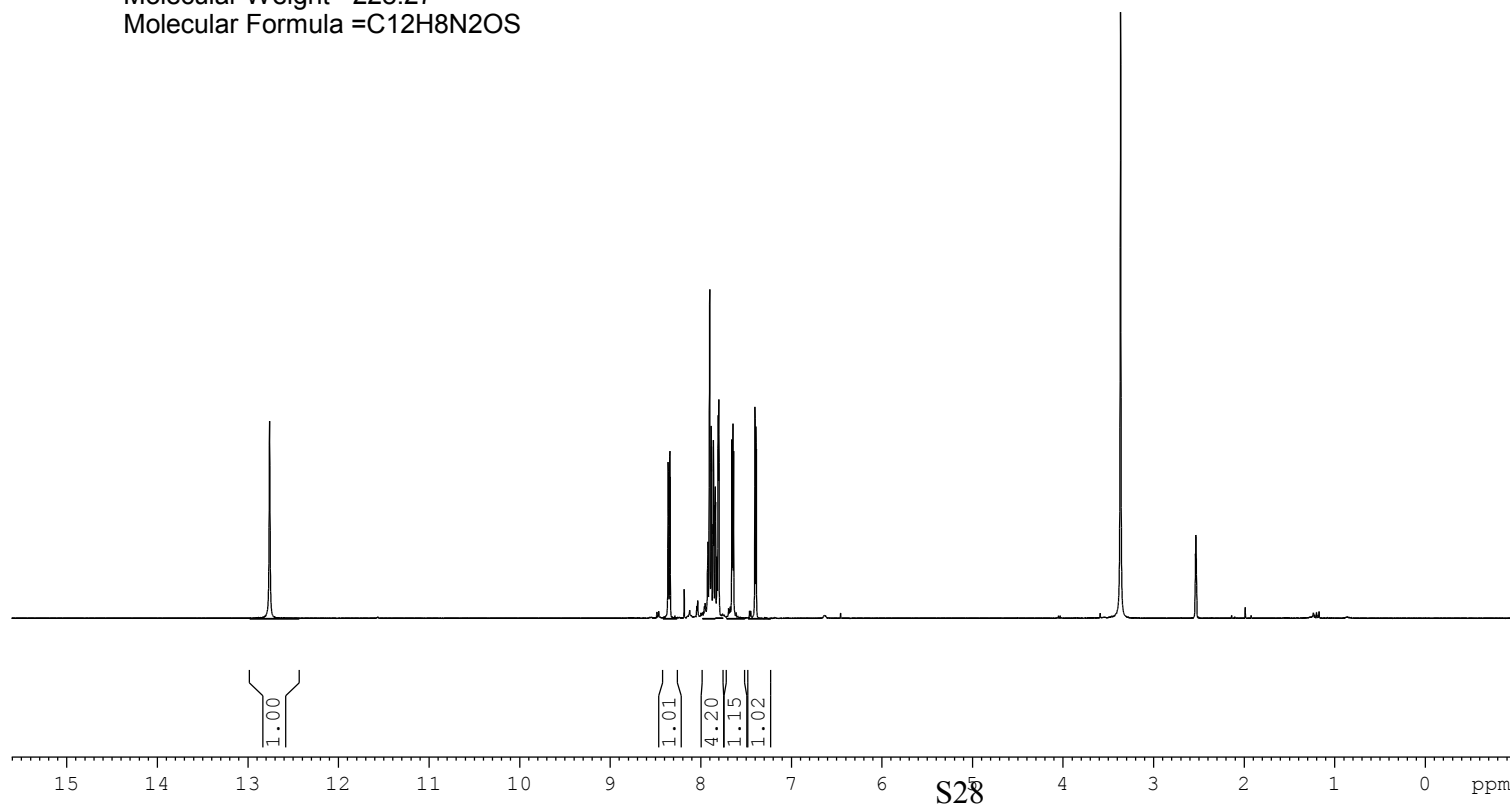

BRUKER  
AVANCE II 400 NMR  
Spectrometer  
SAIF  
Panjab University  
Chandigarh

Current Data Parameters  
NAME Nov29-2014  
EXPNO 220  
PROCNO 1

F2 - Acquisition Parameters  
Date\_ 20141130  
Time 1.42  
INSTRUM spect  
PROBHD 5 mm PABBO BB-  
PULPROG zg30  
TD 65536  
SOLVENT DMSO  
NS 16  
DS 2  
SWH 12019.230 Hz  
FIDRES 0.183399 Hz  
AQ 2.7263477 sec  
RG 287  
DW 41.600 usec  
DE 6.00 usec  
TE 296.1 K  
D1 1.00000000 sec  
TD0 1

===== CHANNEL f1 =====  
NUC1 1H  
P1 10.90 usec  
PL1 -3.00 dB  
SFO1 400.1324710 MHz

F2 - Processing parameters  
SI 32768  
SF 400.1299893 MHz  
WDW EM  
SSB 0  
LB 0.30 Hz  
GB 0  
PC 1.00

avtar\_saifpu@yahoo.co.in

BRUKER  
AVANCE II 400 NMR  
Spectrometer  
SAIF  
Panjab University  
Chandigarh

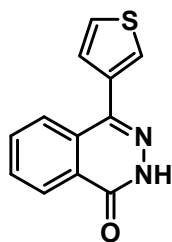

5m

Molecular Weight =228.27  
Molecular Formula =C12H8N2OS

159.19  
142.04  
135.77  
133.26  
131.18  
129.10  
128.29  
127.84  
126.21  
126.13  
125.96  
125.89  
79.04  
78.71  
78.38  
40.19  
39.98  
39.78  
39.57  
39.36  
39.15  
38.94

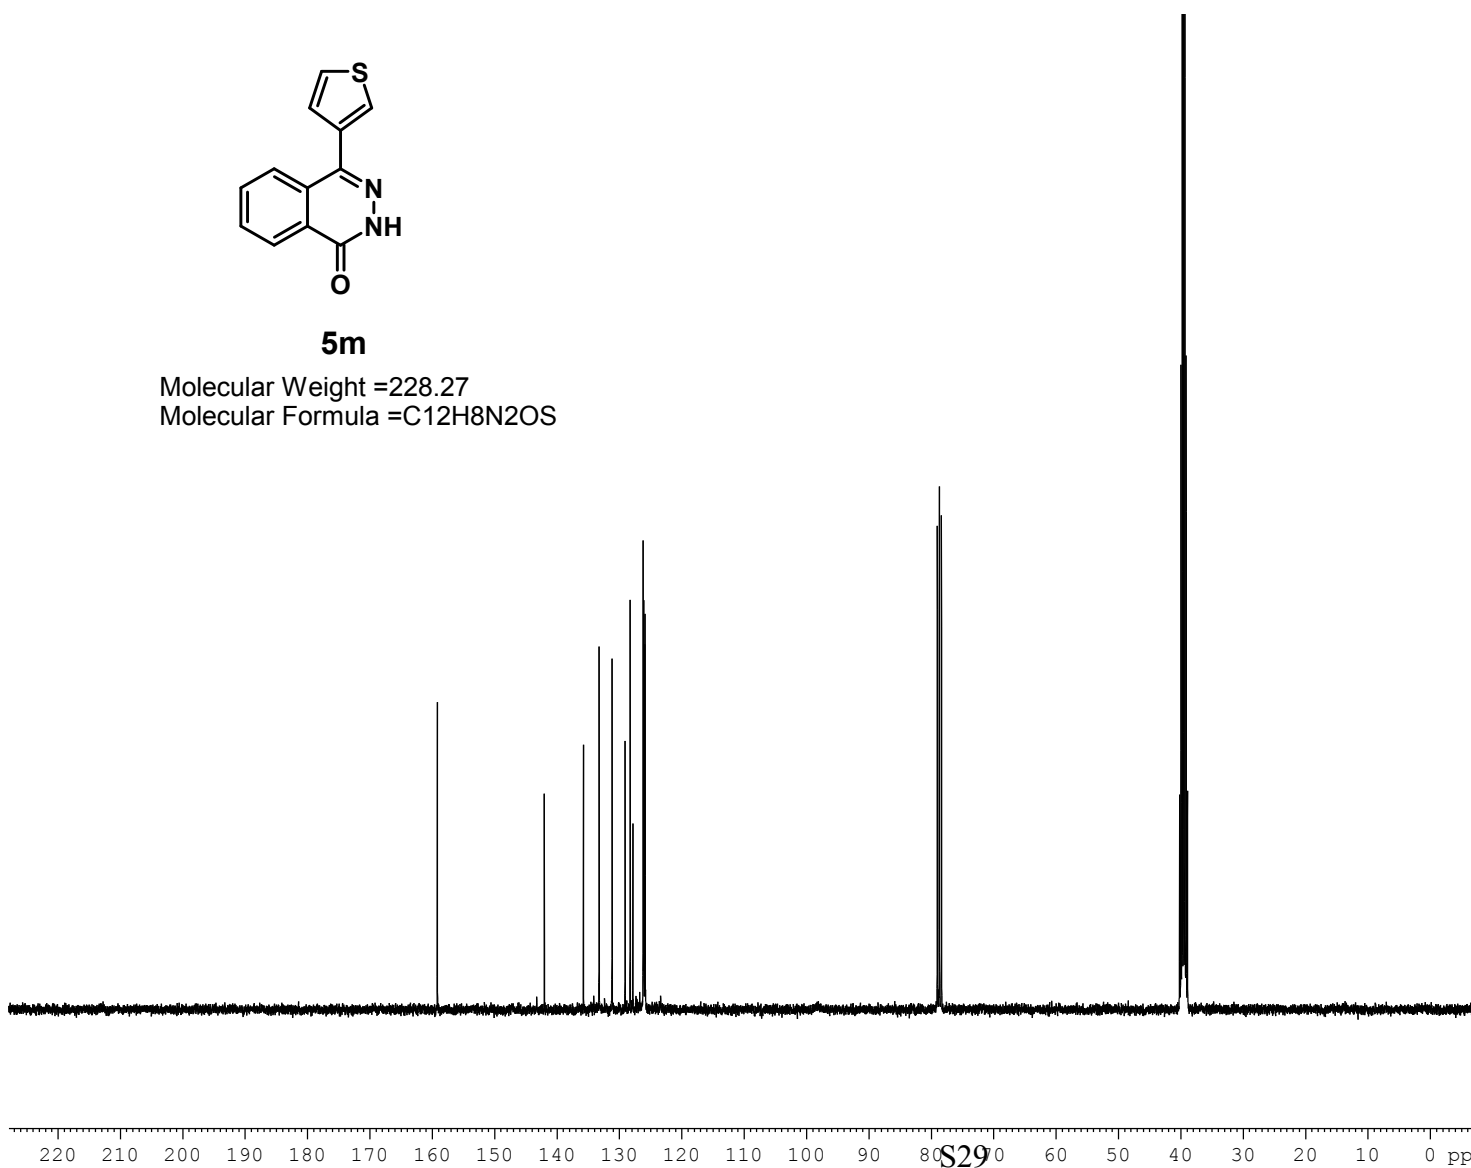

Current Data Parameters  
NAME Nov29-2014  
EXPNO 221  
PROCNO 1  
  
F2 - Acquisition Parameters  
Date\_ 20141130  
Time 2.38  
INSTRUM spect  
PROBHD 5 mm PABBO BB-  
PULPROG zgpg30  
TD 65536  
SOLVENT DMSO  
NS 1024  
DS 4  
SWH 29761.904 Hz  
FIDRES 0.454131 Hz  
AQ 1.1010548 sec  
RG 1030  
DW 16.800 usec  
DE 6.00 usec  
TE 296.5 K  
D1 2.00000000 sec  
d11 0.03000000 sec  
DELTA 1.89999998 sec  
TD0 1

==== CHANNEL f1 =====  
NUC1 13C  
P1 9.60 usec  
PL1 -2.00 dB  
SFO1 100.6228298 MHz

==== CHANNEL f2 =====  
CPDPRG2 waltz16  
NUC2 1H  
PCPD2 80.00 usec  
PL2 -3.00 dB  
PL12 14.31 dB  
PL13 18.00 dB  
SFO2 400.1316005 MHz

F2 - Processing parameters  
SI 32768  
SF 100.6128193 MHz  
WDW EM  
SSB 0  
LB 1.00 Hz  
GB 0  
PC 1.40

GRD-05

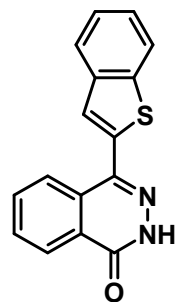

5n

Molecular Weight =278.33  
Molecular Formula =C16H10N2OS

12.9996

8.4015  
8.3821  
8.3272  
8.3071  
8.0736  
8.0283  
7.9941  
7.9766  
7.9582  
7.9478  
7.9387  
7.9331  
7.9192  
7.9033  
7.8846  
7.4520  
7.4420  
7.4336  
7.4272  
7.4192  
7.4087

3.3796

2.5333

BRUKER  
AVANCE II 400 NMR  
Spectrometer  
SAIF  
Panjab University  
Chandigarh

Current Data Parameters  
NAME Jan01-2015  
EXPNO 150  
PROCNO 1

F2 - Acquisition Parameters  
Date 20150101  
Time 19.52  
INSTRUM spect  
PROBHD 5 mm PABBO BB-  
PULPROG zg30  
TD 65536  
SOLVENT DMSO  
NS 8  
DS 2  
SWH 12019.230 Hz  
FIDRES 0.183399 Hz  
AQ 2.7263477 sec  
RG 456  
DW 41.600 usec  
DE 6.00 usec  
TE 293.3 K  
D1 1.0000000 sec  
TD0 1

==== CHANNEL f1 =====  
NUC1 1H  
P1 10.90 usec  
PL1 -3.00 dB  
SFO1 400.1324710 MHz

F2 - Processing parameters  
SI 32768  
SF 400.1299904 MHz  
WDW EM  
SSB 0  
LB 0.30 Hz  
GB 0  
PC 1.00

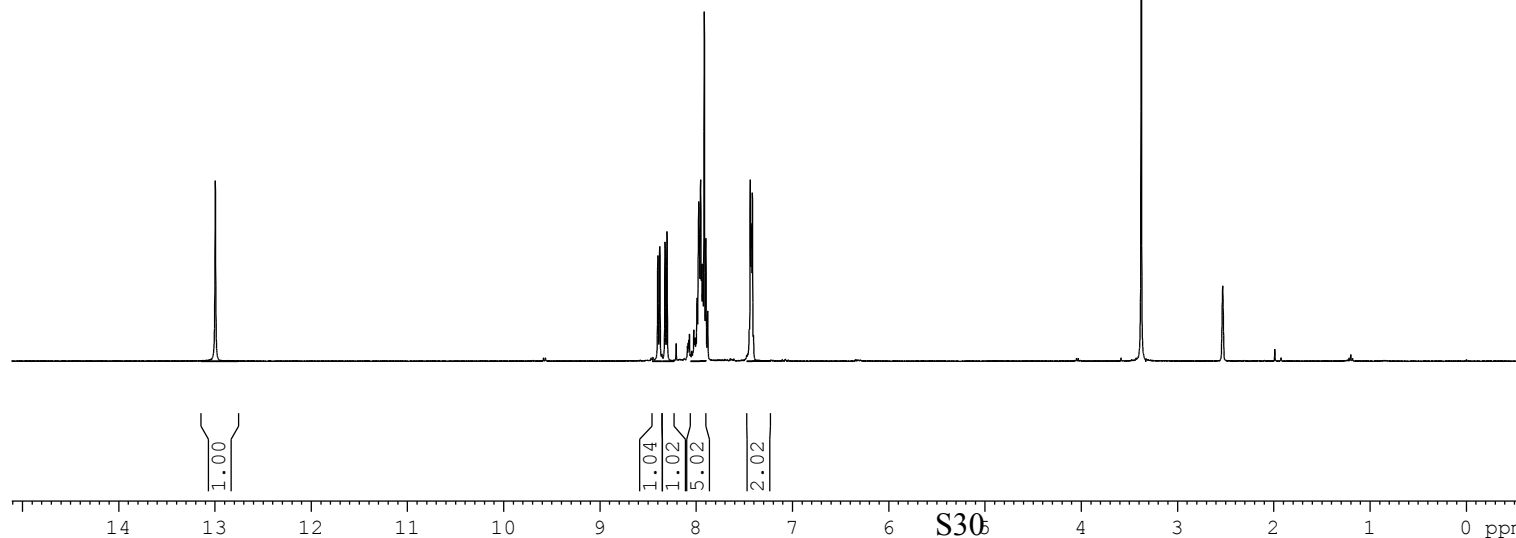

BRUKER  
 AVANCE II 400 NMR  
 Spectrometer  
 SAIF  
 Panjab University  
 Chandigarh

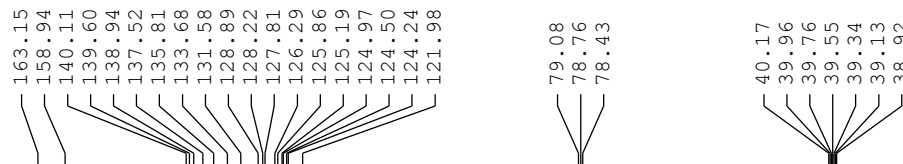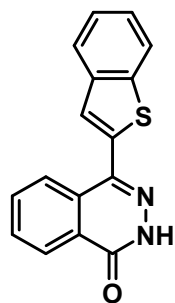

5n

Molecular Weight =278.33  
 Molecular Formula =C16H10N2OS

Current Data Parameters  
 NAME Jan01-2015  
 EXPNO 151  
 PROCNO 1

F2 - Acquisition Parameters  
 Date 20150101  
 Time 20.20  
 INSTRUM spect  
 PROBHD 5 mm PABBO BB-  
 PULPROG zgpg30  
 TD 65536  
 SOLVENT DMSO  
 NS 512  
 DS 4  
 SWH 29761.904 Hz  
 FIDRES 0.454131 Hz  
 AQ 1.1010548 sec  
 RG 912  
 DW 16.800 usec  
 DE 6.00 usec  
 TE 293.6 K  
 D1 2.00000000 sec  
 d11 0.03000000 sec  
 DELTA 1.89999998 sec  
 TD0 1

==== CHANNEL f1 =====  
 NUC1 13C  
 P1 9.60 usec  
 PL1 -2.00 dB  
 SFO1 100.6228298 MHz

==== CHANNEL f2 =====  
 CPDPRG2 waltz16  
 NUC2 1H  
 PCPD2 80.00 usec  
 PL2 -3.00 dB  
 PL12 14.31 dB  
 PL13 18.00 dB  
 SFO2 400.1316005 MHz

F2 - Processing parameters  
 SI 32768  
 SF 100.6128193 MHz  
 WDW EM  
 SSB 0  
 LB 1.00 Hz  
 GB 0  
 PC 1.40

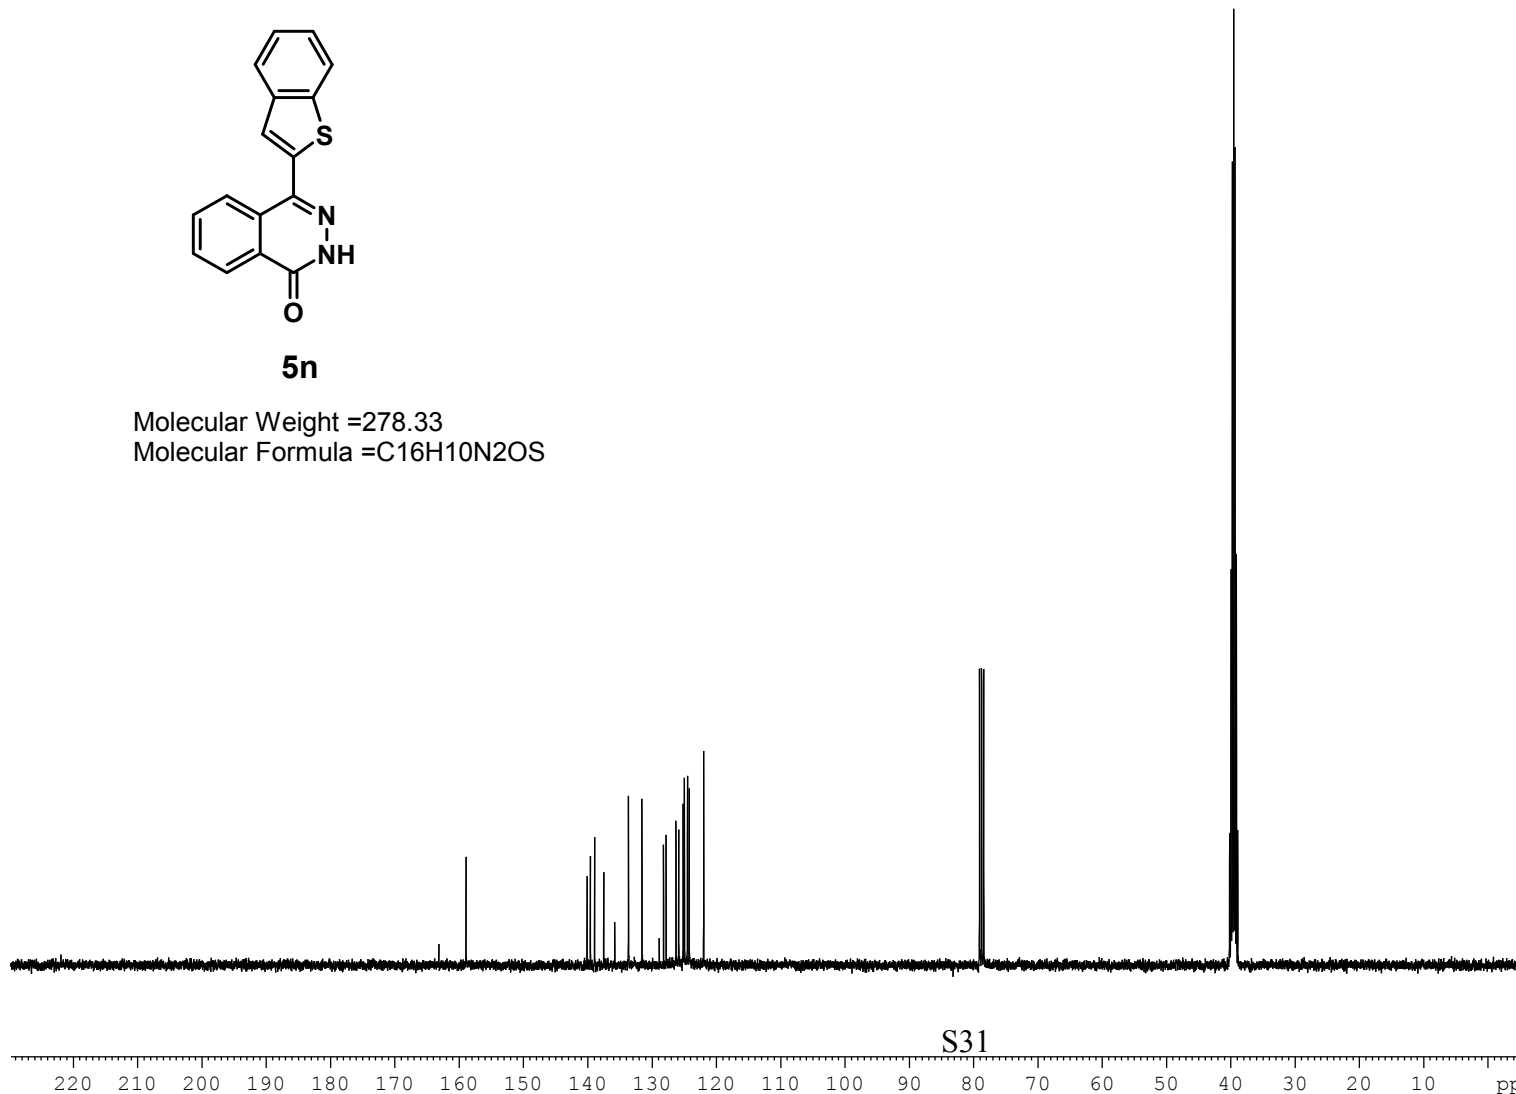

SRD-O

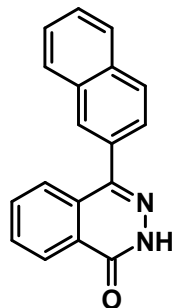

50

Molecular Weight =272.31  
 Molecular Formula =C<sub>18</sub>H<sub>12</sub>N<sub>2</sub>O

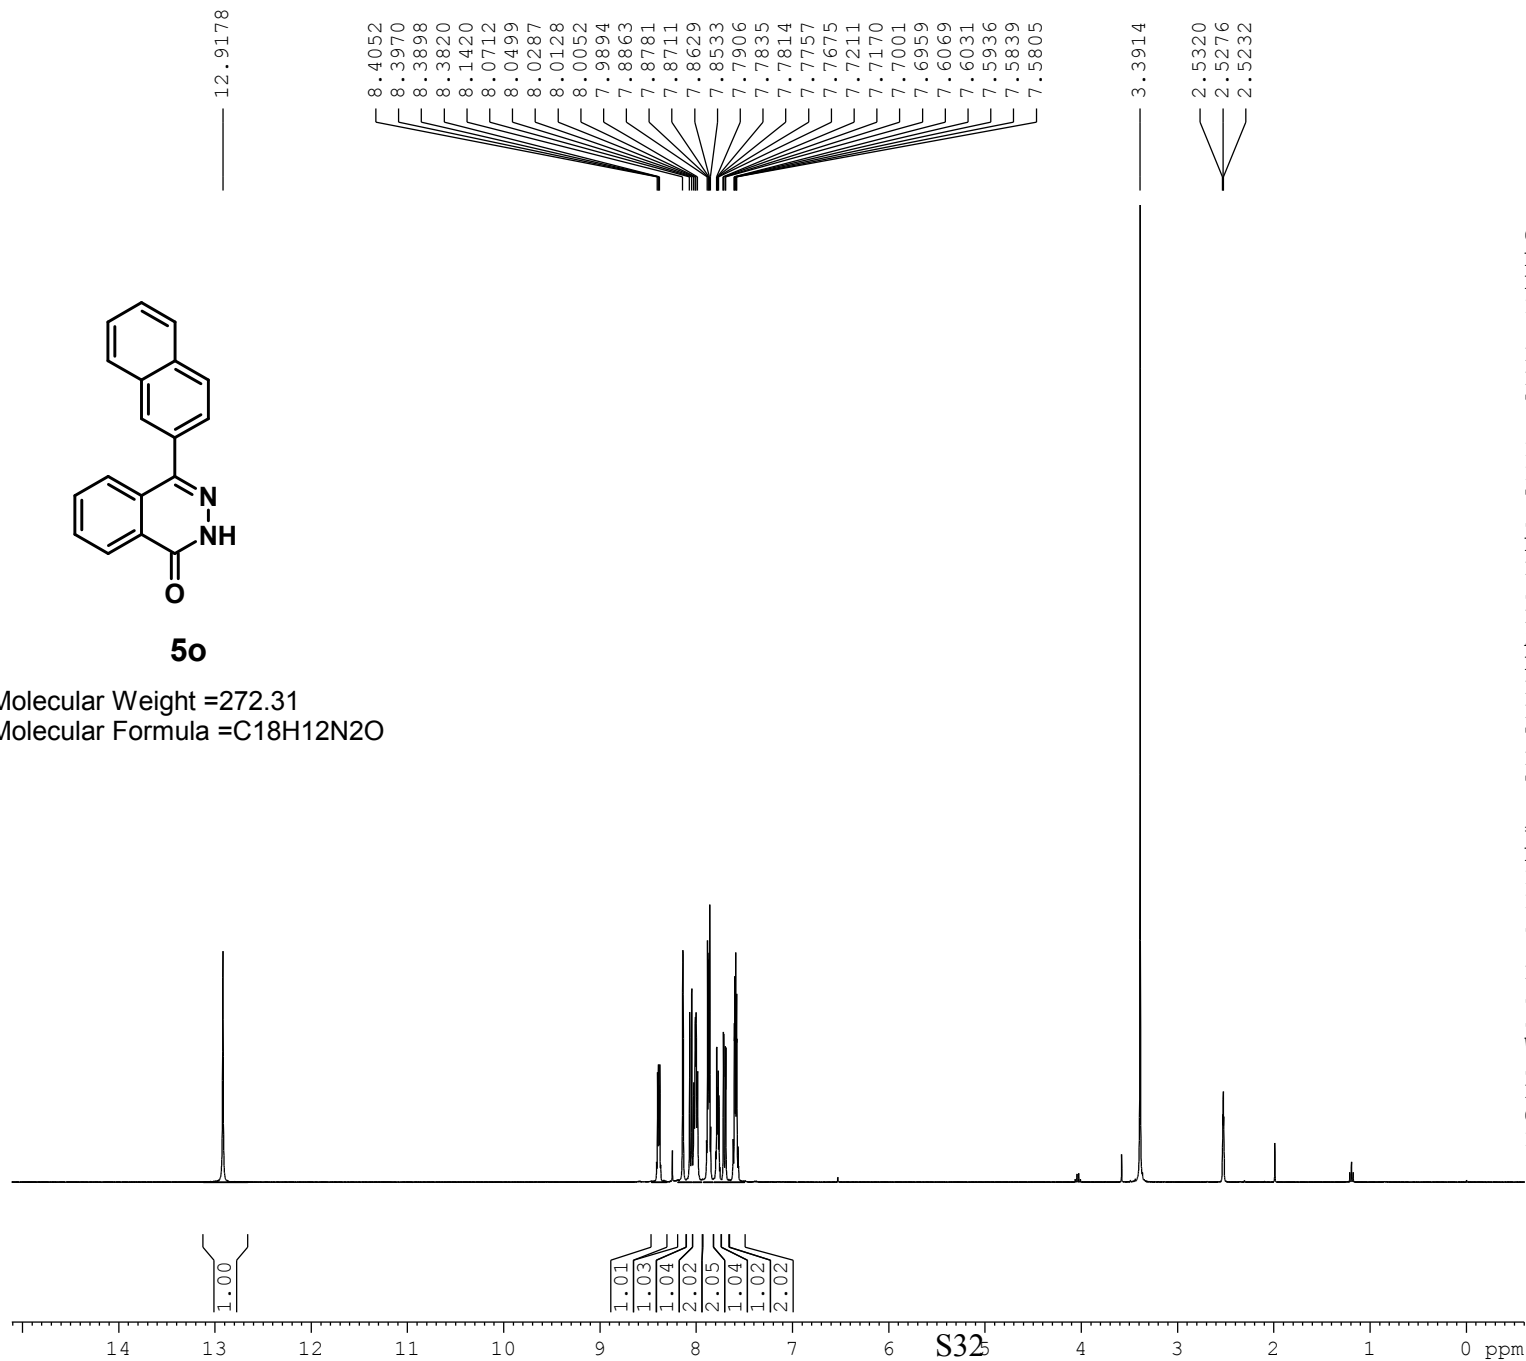

BRUKER  
 AVANCE II 400 NMR  
 Spectrometer  
 SAIF  
 Panjab University  
 Chandigarh

Current Data Parameters  
 NAME Jan01-2015  
 EXPNO 50  
 PROCNO 1

F2 - Acquisition Parameters  
 Date 20150101  
 Time 12.48  
 INSTRUM spect  
 PROBHD 5 mm PABBO BB-  
 PULPROG zg30  
 TD 65536  
 SOLVENT DMSO  
 NS 8  
 DS 2  
 SWH 12019.230 Hz  
 FIDRES 0.183399 Hz  
 AQ 2.7263477 sec  
 RG 228  
 DW 41.600 usec  
 DE 6.00 usec  
 TE 293.0 K  
 D1 1.0000000 sec  
 TD0 1

==== CHANNEL f1 =====  
 NUC1 1H  
 P1 10.90 usec  
 PL1 -3.00 dB  
 SFO1 400.1324710 MHz

F2 - Processing parameters  
 SI 32768  
 SF 400.1299925 MHz  
 WDW EM  
 SSB 0  
 LB 0.30 Hz  
 GB 0  
 PC 1.00



SRD-O

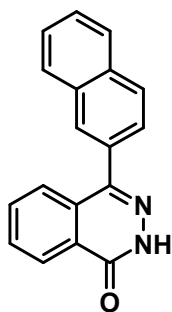

5o

Molecular Weight =272.31  
Molecular Formula =C18H12N2O

159.28  
146.25  
133.33  
132.78  
132.58  
132.51  
131.34  
129.10  
128.60  
128.17  
127.99  
127.93  
127.54  
126.74  
126.71  
126.52  
126.48  
126.06

79.16  
78.83  
78.50

40.15  
39.94  
39.74  
39.53  
39.32  
39.11  
38.90

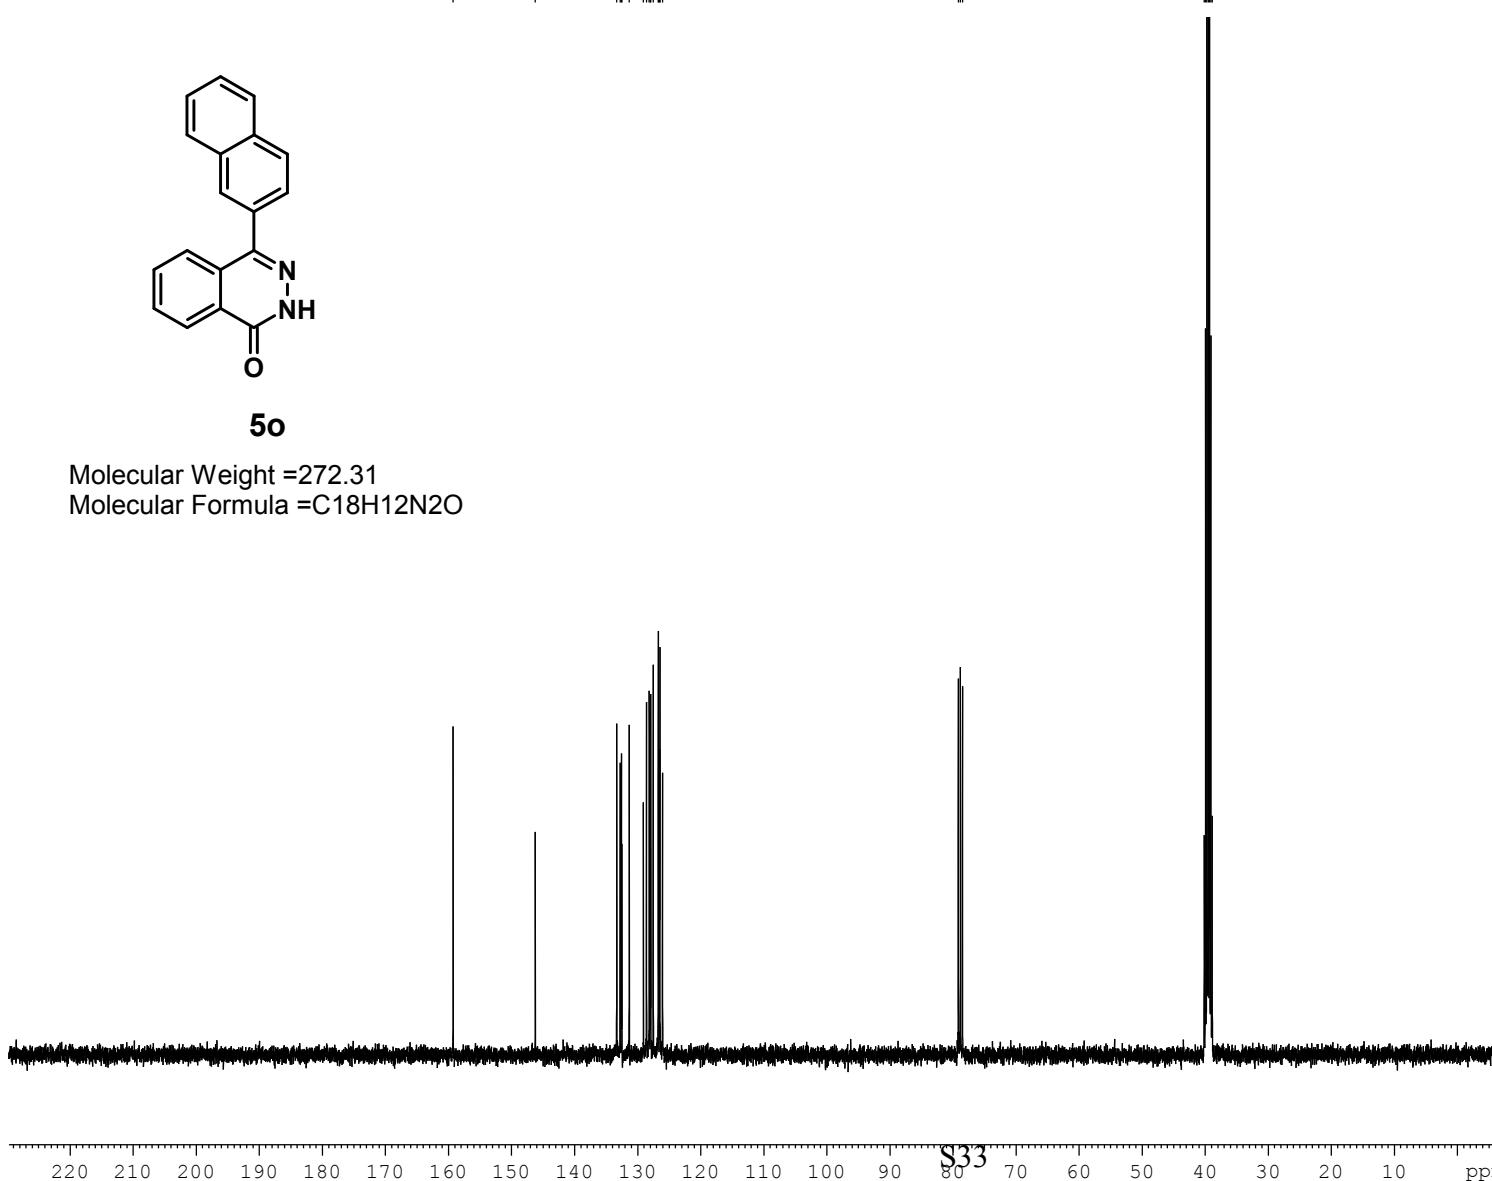

BRUKER  
AVANCE II 400 NMR  
Spectrometer  
SAIF  
Panjab University  
Chandigarh

Current Data Parameters  
NAME Jan01-2015  
EXPNO 52  
PROCNO 1

F2 - Acquisition Parameters  
Date\_ 20150101  
Time\_ 13.58  
INSTRUM spect  
PROBHD 5 mm PABBO BB-  
PULPROG zgpg30  
TD 65536  
SOLVENT DMSO  
NS 400  
DS 4  
SWH 29761.904 Hz  
FIDRES 0.454131 Hz  
AQ 1.1010548 sec  
RG 912  
DW 16.800 usec  
DE 6.00 usec  
TE 293.5 K  
D1 2.0000000 sec  
d11 0.0300000 sec  
DELTA 1.89999998 sec  
TDO 1

==== CHANNEL f1 =====  
NUC1 13C  
P1 9.60 usec  
PL1 -2.00 dB  
SFO1 100.6228298 MHz

==== CHANNEL f2 =====  
CPDPRG2 waltz16  
NUC2 1H  
PCPD2 80.00 usec  
PL2 -3.00 dB  
PL12 14.31 dB  
PL13 18.00 dB  
SFO2 400.1316005 MHz

F2 - Processing parameters  
SI 32768  
SF 100.6128193 MHz  
WDW EM  
SSB 0  
LB 1.00 Hz  
GB 0  
PC 1.40

avtar\_saifpu@yahoo.co.in

BRUKER  
 AVANCE II 400 NMR  
 Spectrometer  
 SAIF  
 Panjab University  
 Chandigarh

Current Data Parameters  
 NAME Jan01-2015  
 EXPNO 60  
 PROCNO 1

F2 - Acquisition Parameters  
 Date 20150101  
 Time 14.03  
 INSTRUM spect  
 PROBHD 5 mm PABBO BB-  
 PULPROG zg30  
 TD 65536  
 SOLVENT DMSO  
 NS 8  
 DS 2  
 SWH 12019.230 Hz  
 FIDRES 0.183399 Hz  
 AQ 2.7263477 sec  
 RG 512  
 DW 41.600 usec  
 DE 6.00 usec  
 TE 293.2 K  
 D1 1.0000000 sec  
 TD0 1

==== CHANNEL f1 =====  
 NUC1 1H  
 P1 10.90 usec  
 PL1 -3.00 dB  
 SFO1 400.1324710 MHz

F2 - Processing parameters  
 SI 32768  
 SF 400.1299856 MHz  
 WDW EM  
 SSB 0  
 LB 0.30 Hz  
 GB 0  
 PC 1.00

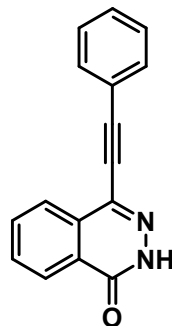

**6a**

Molecular Weight =246.27  
 Molecular Formula =C16H10N2O

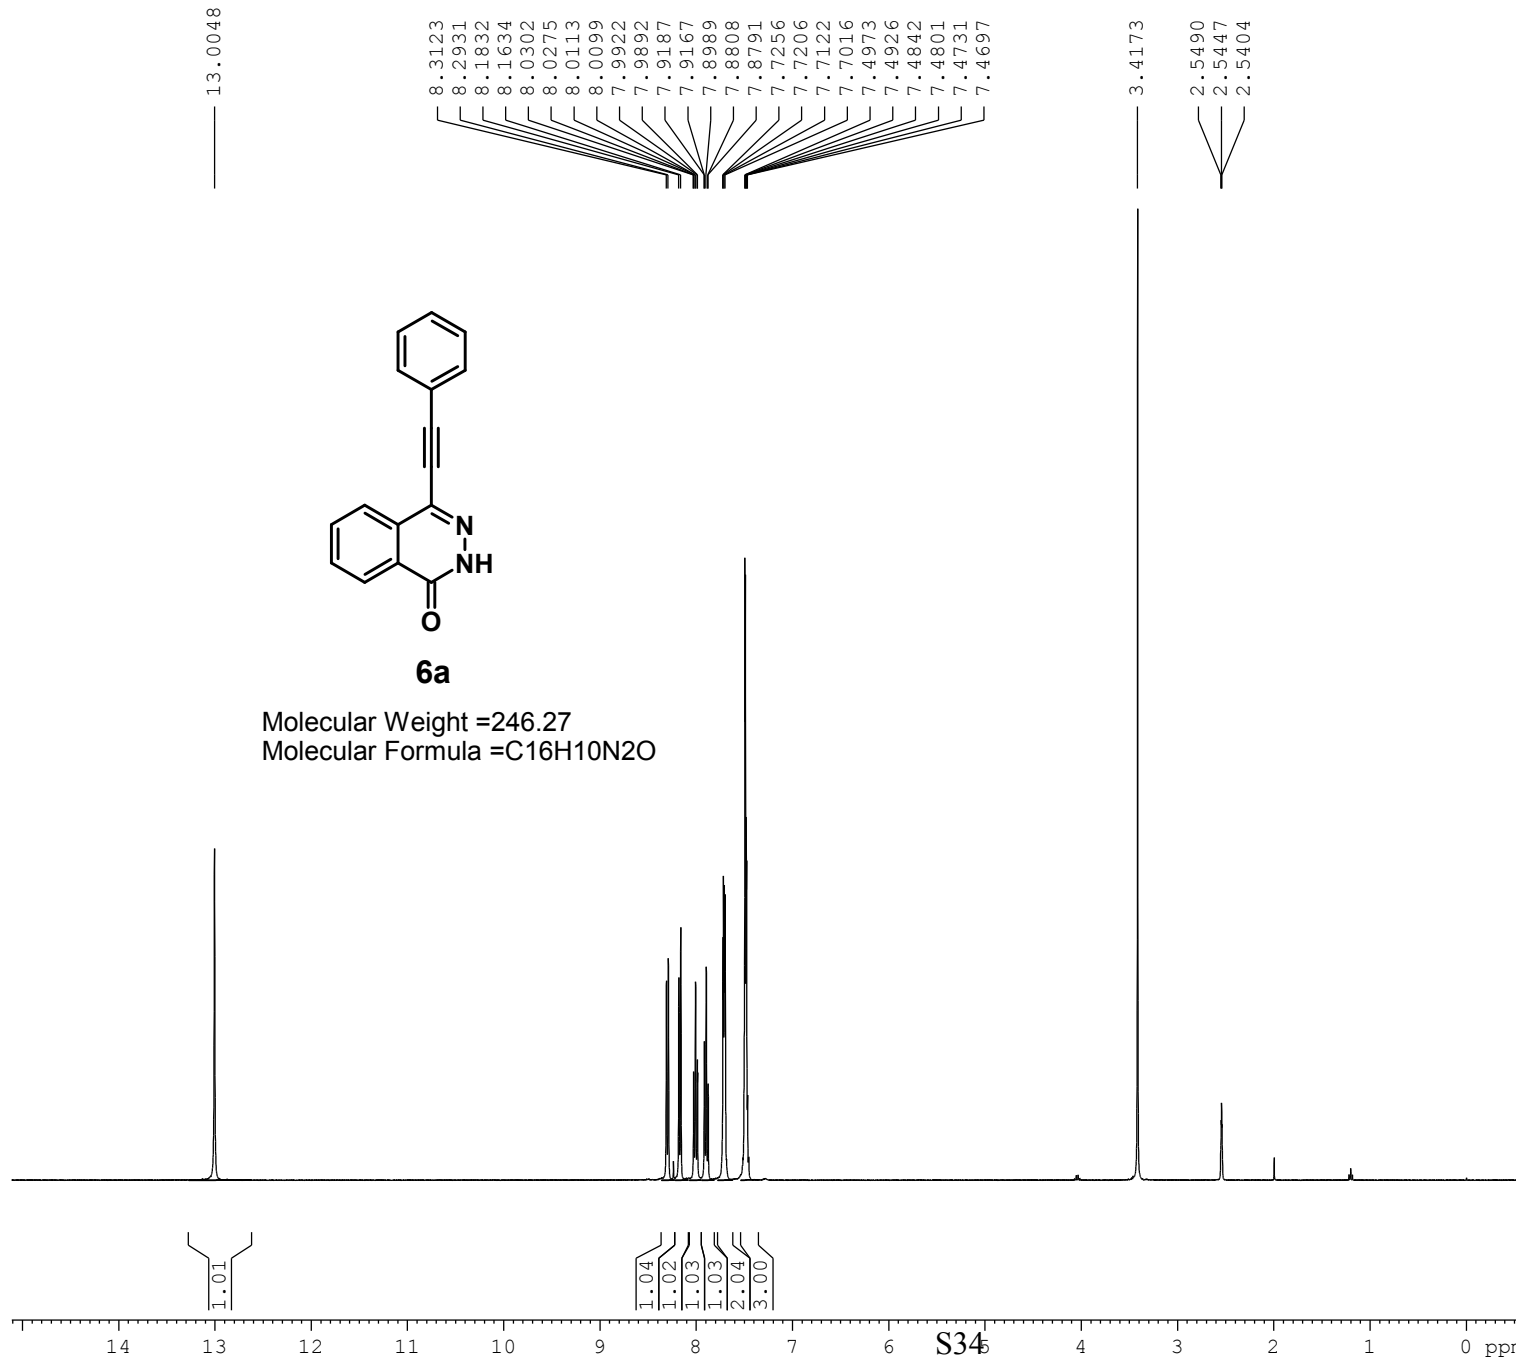

SRD-P

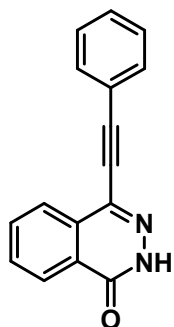

6a

Molecular Weight = 246.27  
Molecular Formula = C<sub>16</sub>H<sub>10</sub>N<sub>2</sub>O

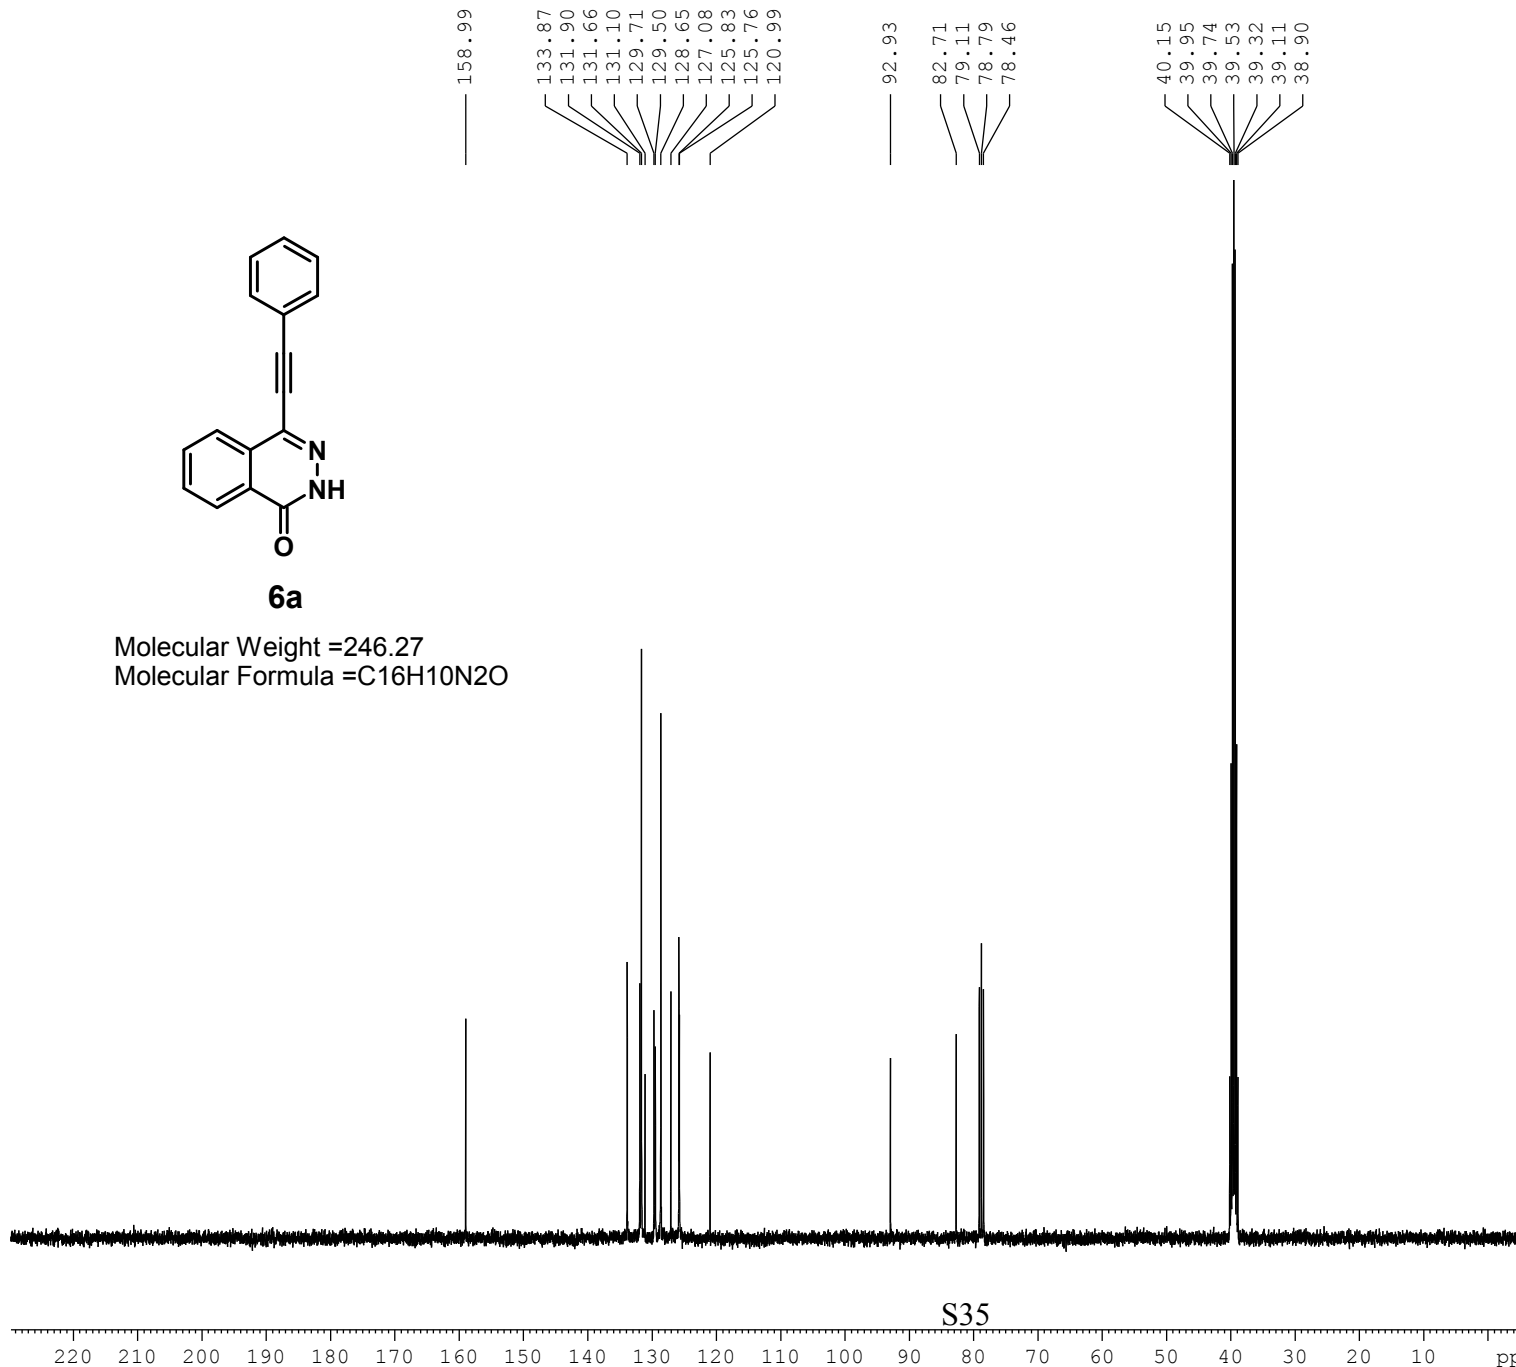

BRUKER  
AVANCE II 400 NMR  
Spectrometer  
SAIF  
Panjab University  
Chandigarh

Current Data Parameters  
NAME Jan01-2015  
EXPNO 61  
PROCNO 1

F2 - Acquisition Parameters  
Date\_ 20150101  
Time\_ 14.10  
INSTRUM spect  
PROBHD 5 mm PABBO BB-  
PULPROG zgpg30  
TD 65536  
SOLVENT DMSO  
NS 244  
DS 4  
SWH 29761.904 Hz  
FIDRES 0.454131 Hz  
AQ 1.1010548 sec  
RG 912  
DW 16.800 usec  
DE 6.00 usec  
TE 293.4 K  
D1 2.00000000 sec  
d11 0.03000000 sec  
DELTA 1.89999998 sec  
TD0 1

==== CHANNEL f1 =====  
NUC1 13C  
P1 9.60 usec  
PL1 -2.00 dB  
SFO1 100.6228298 MHz

==== CHANNEL f2 =====  
CPDPRG2 waltz16  
NUC2 1H  
PCPD2 80.00 usec  
PL2 -3.00 dB  
PL12 14.31 dB  
PL13 18.00 dB  
SFO2 400.1316005 MHz

F2 - Processing parameters  
SI 32768  
SF 100.6128193 MHz  
WDW EM  
SSB 0  
LB 1.00 Hz  
GB 0  
PC 1.40

avtar\_saifpu@yahoo.co.in

SRD-W

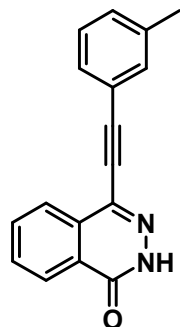

**6b**

Molecular Weight =260.30  
Molecular Formula =C17H12N2O

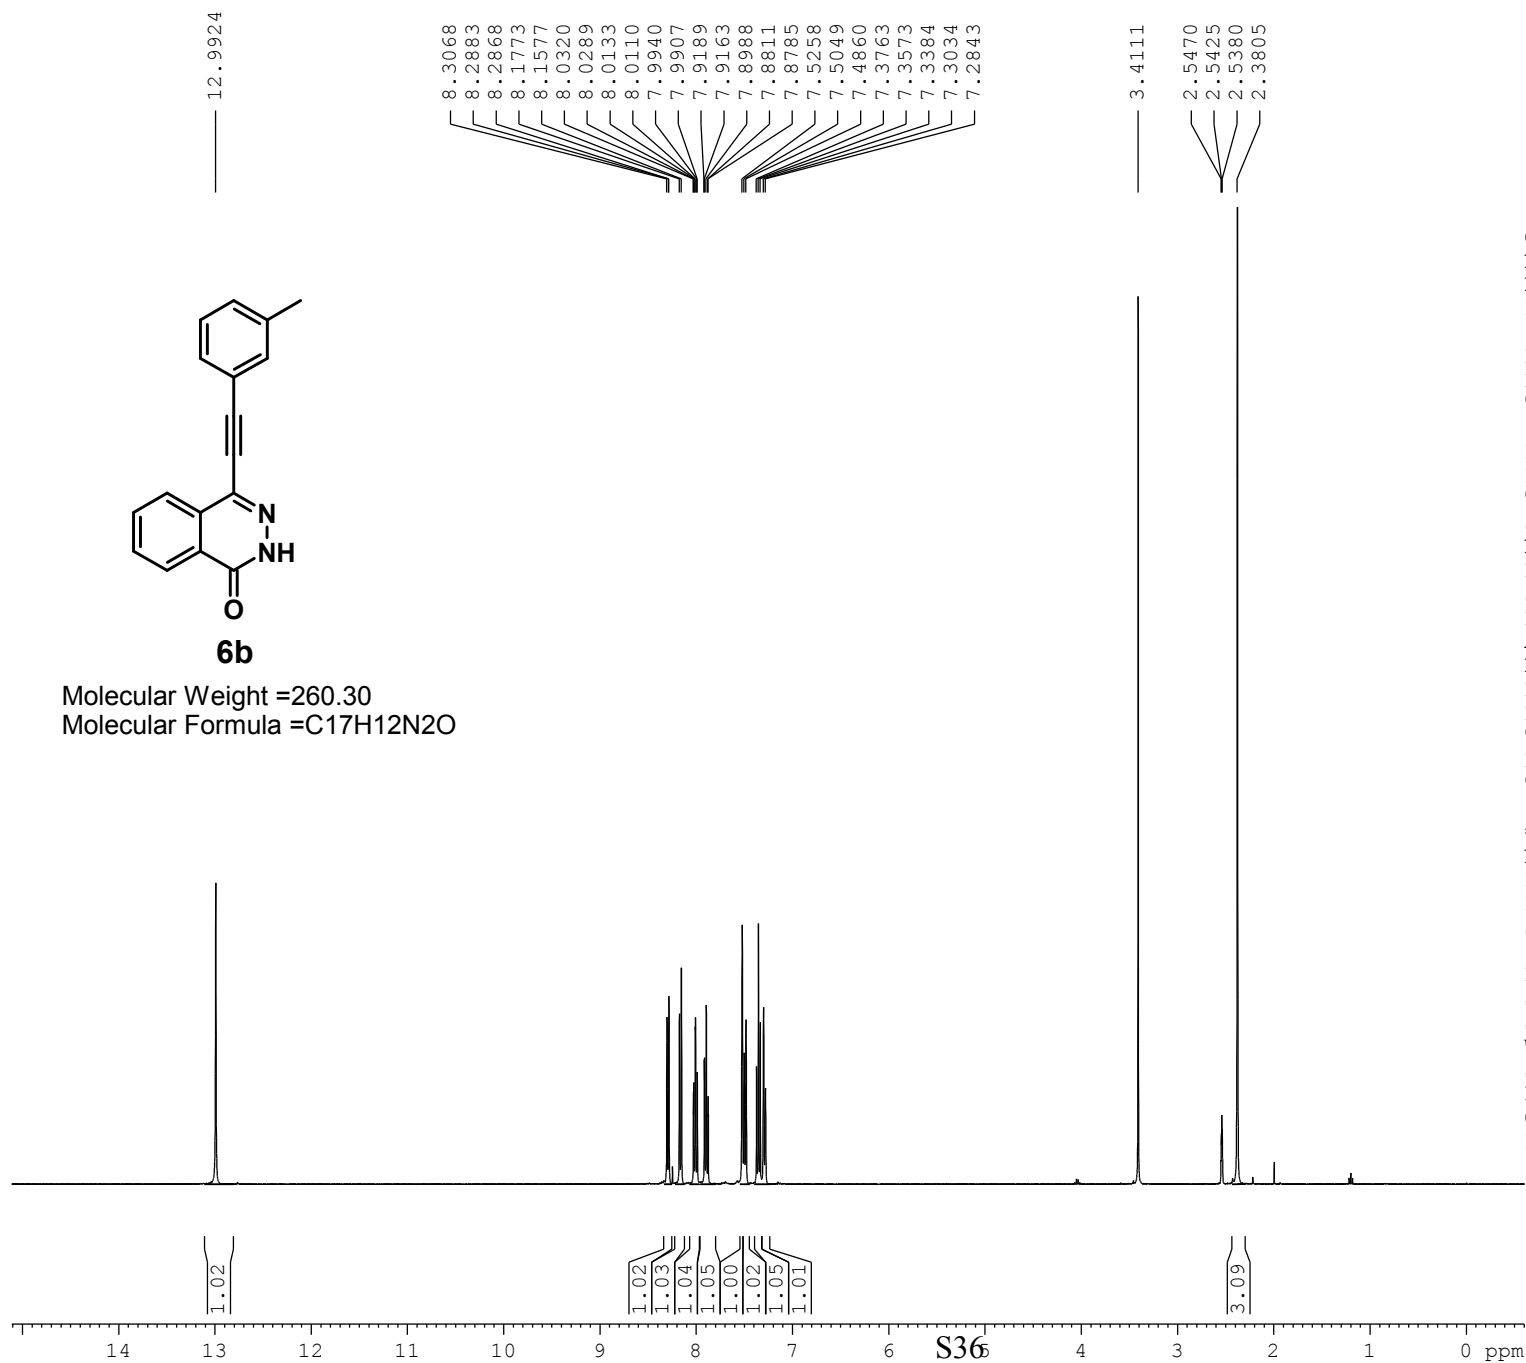

BRUKER  
AVANCE II 400 NMR  
Spectrometer  
SAIF  
Panjab University  
Chandigarh

Current Data Parameters  
NAME Jan01-2015  
EXPNO 130  
PROCNO 1

F2 - Acquisition Parameters  
Date 20150101  
Time 17.37  
INSTRUM spect  
PROBHD 5 mm PABBO BB-  
PULPROG zg30  
TD 65536  
SOLVENT DMSO  
NS 8  
DS 2  
SWH 12019.230 Hz  
FIDRES 0.183399 Hz  
AQ 2.7263477 sec  
RG 406  
DW 41.600 usec  
DE 6.00 usec  
TE 293.4 K  
D1 1.00000000 sec  
TD0 1

==== CHANNEL f1 =====  
NUC1 1H  
P1 10.90 usec  
PL1 -3.00 dB  
SFO1 400.1324710 MHz

F2 - Processing parameters  
SI 32768  
SF 400.1299864 MHz  
WDW EM  
SSB 0  
LB 0.30 Hz  
GB 0  
PC 1.00

SRD-W

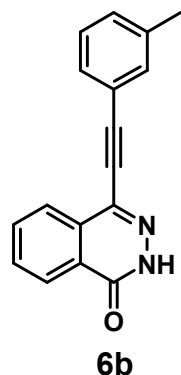

Molecular Weight =260.30  
Molecular Formula =C<sub>17</sub>H<sub>12</sub>N<sub>2</sub>O

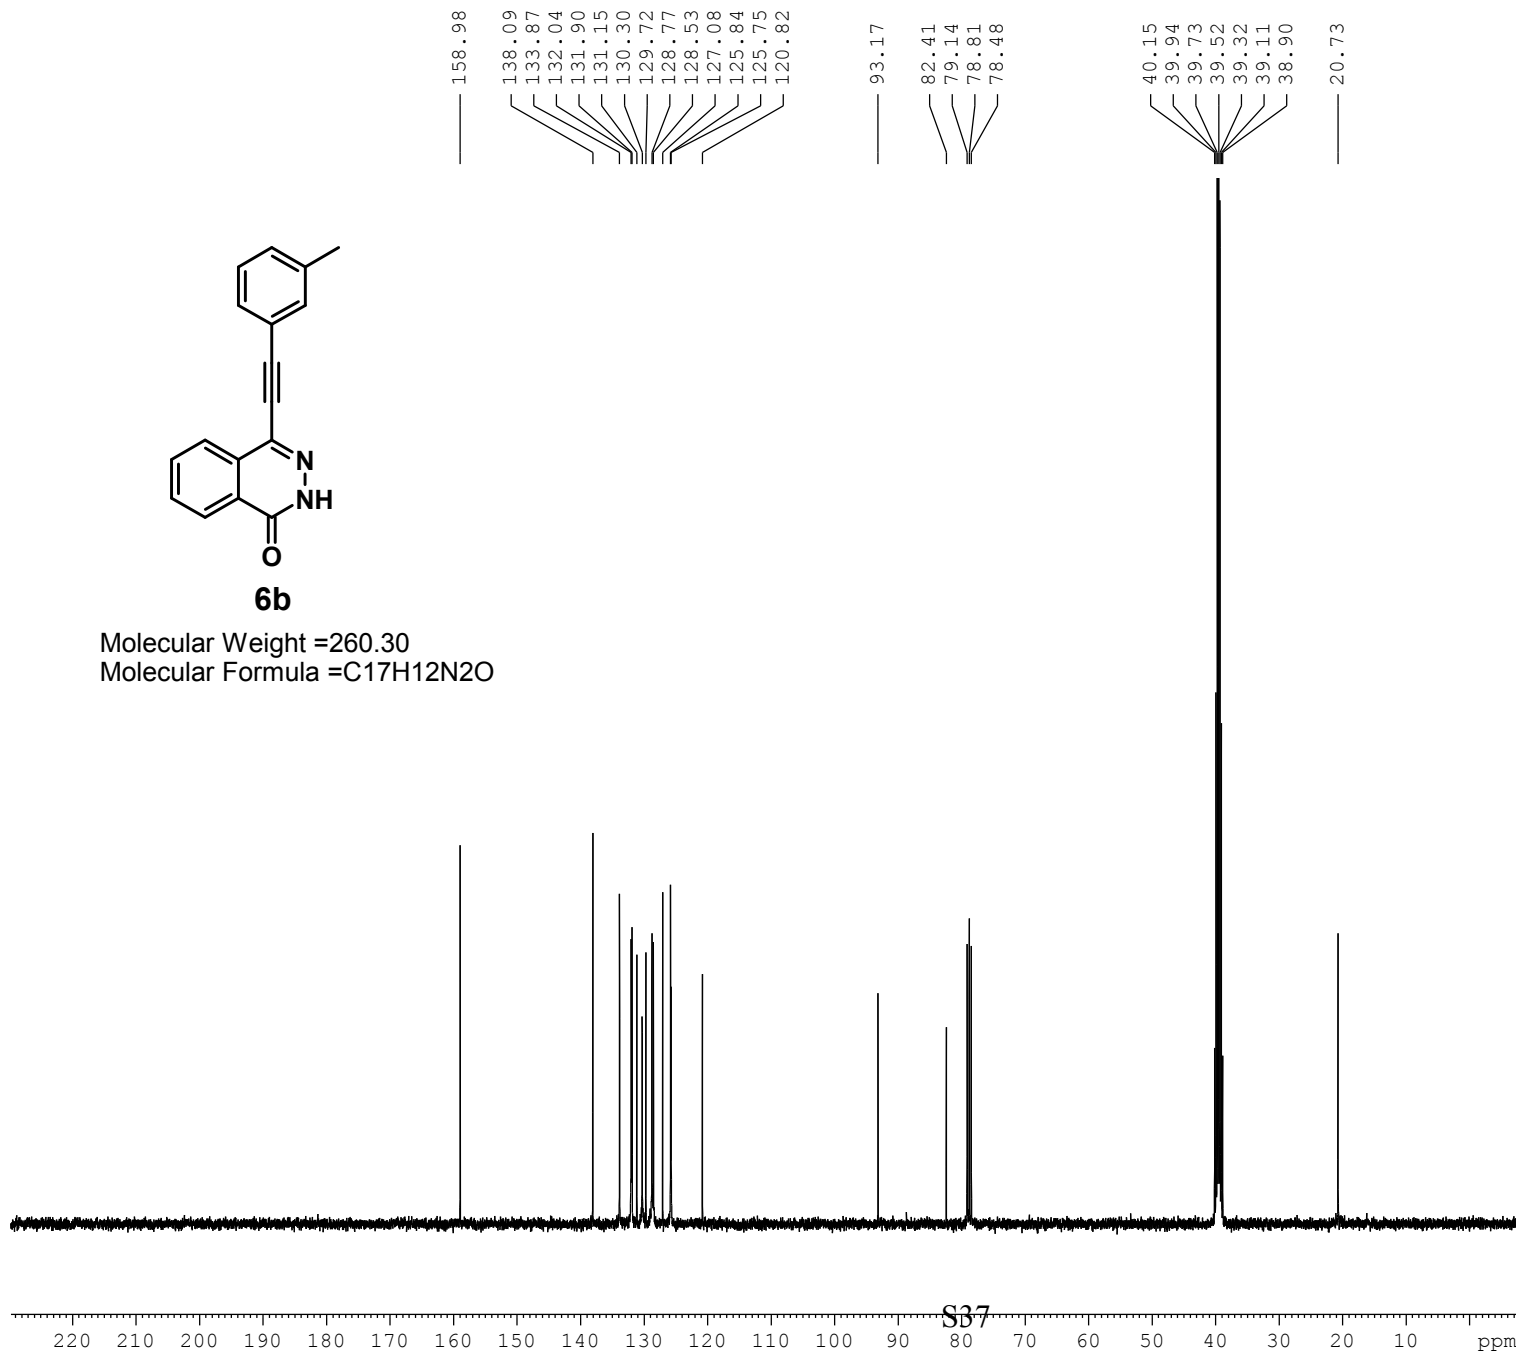

BRUKER  
AVANCE II 400 NMR  
Spectrometer  
SAIF  
Panjab University  
Chandigarh

Current Data Parameters  
NAME Jan01-2015  
EXPNO 131  
PROCNO 1

F2 - Acquisition Parameters  
Date\_ 20150101  
Time\_ 17.48  
INSTRUM spect  
PROBHD 5 mm PABBO BB-  
PULPROG zgpg30  
TD 65536  
SOLVENT DMSO  
NS 512  
DS 4  
SWH 29761.904 Hz  
FIDRES 0.454131 Hz  
AQ 1.1010548 sec  
RG 1030  
DW 16.800 usec  
DE 6.00 usec  
TE 293.6 K  
D1 2.0000000 sec  
d11 0.0300000 sec  
DELTA 1.89999998 sec  
TD0 1

==== CHANNEL f1 =====  
NUC1 13C  
P1 9.60 usec  
PL1 -2.00 dB  
SFO1 100.6228298 MHz

==== CHANNEL f2 =====  
CPDPRG2 waltz16  
NUC2 1H  
PCPD2 80.00 usec  
PL2 -3.00 dB  
PL12 14.31 dB  
PL13 18.00 dB  
SFO2 400.1316005 MHz

F2 - Processing parameters  
SI 32768  
SF 100.6128193 MHz  
WDW EM  
SSB 0  
LB 1.00 Hz  
GB 0  
PC 1.40

avtar\_saifpu@yahoo.co.in

SRD-X

BRUKER  
AVANCE II 400 NMR  
Spectrometer  
SAIF  
Panjab University  
Chandigarh

Current Data Parameters  
NAME Jan01-2015  
EXPNO 120  
PROCNO 1

F2 - Acquisition Parameters

Date\_ 20150101  
Time\_ 17.03  
INSTRUM spect  
PROBHD 5 mm PABBO BB-  
PULPROG zg30  
TD 65536  
SOLVENT DMSO  
NS 8  
DS 2  
SWH 12019.230 Hz  
FIDRES 0.183399 Hz  
AQ 2.7263477 sec  
RG 575  
DW 41.600 usec  
DE 6.00 usec  
TE 293.4 K  
D1 1.00000000 sec  
TD0 1

==== CHANNEL f1 =====  
NUC1 1H  
P1 10.90 usec  
PL1 -3.00 dB  
SFO1 400.1324710 MHz

F2 - Processing parameters  
SI 32768  
SF 400.1299885 MHz  
WDW EM  
SSB 0  
LB 0.30 Hz  
GB 0  
PC 1.00

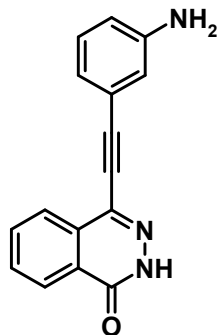

**6c**

Molecular Weight =261.29  
Molecular Formula =C<sub>16</sub>H<sub>11</sub>N<sub>3</sub>O

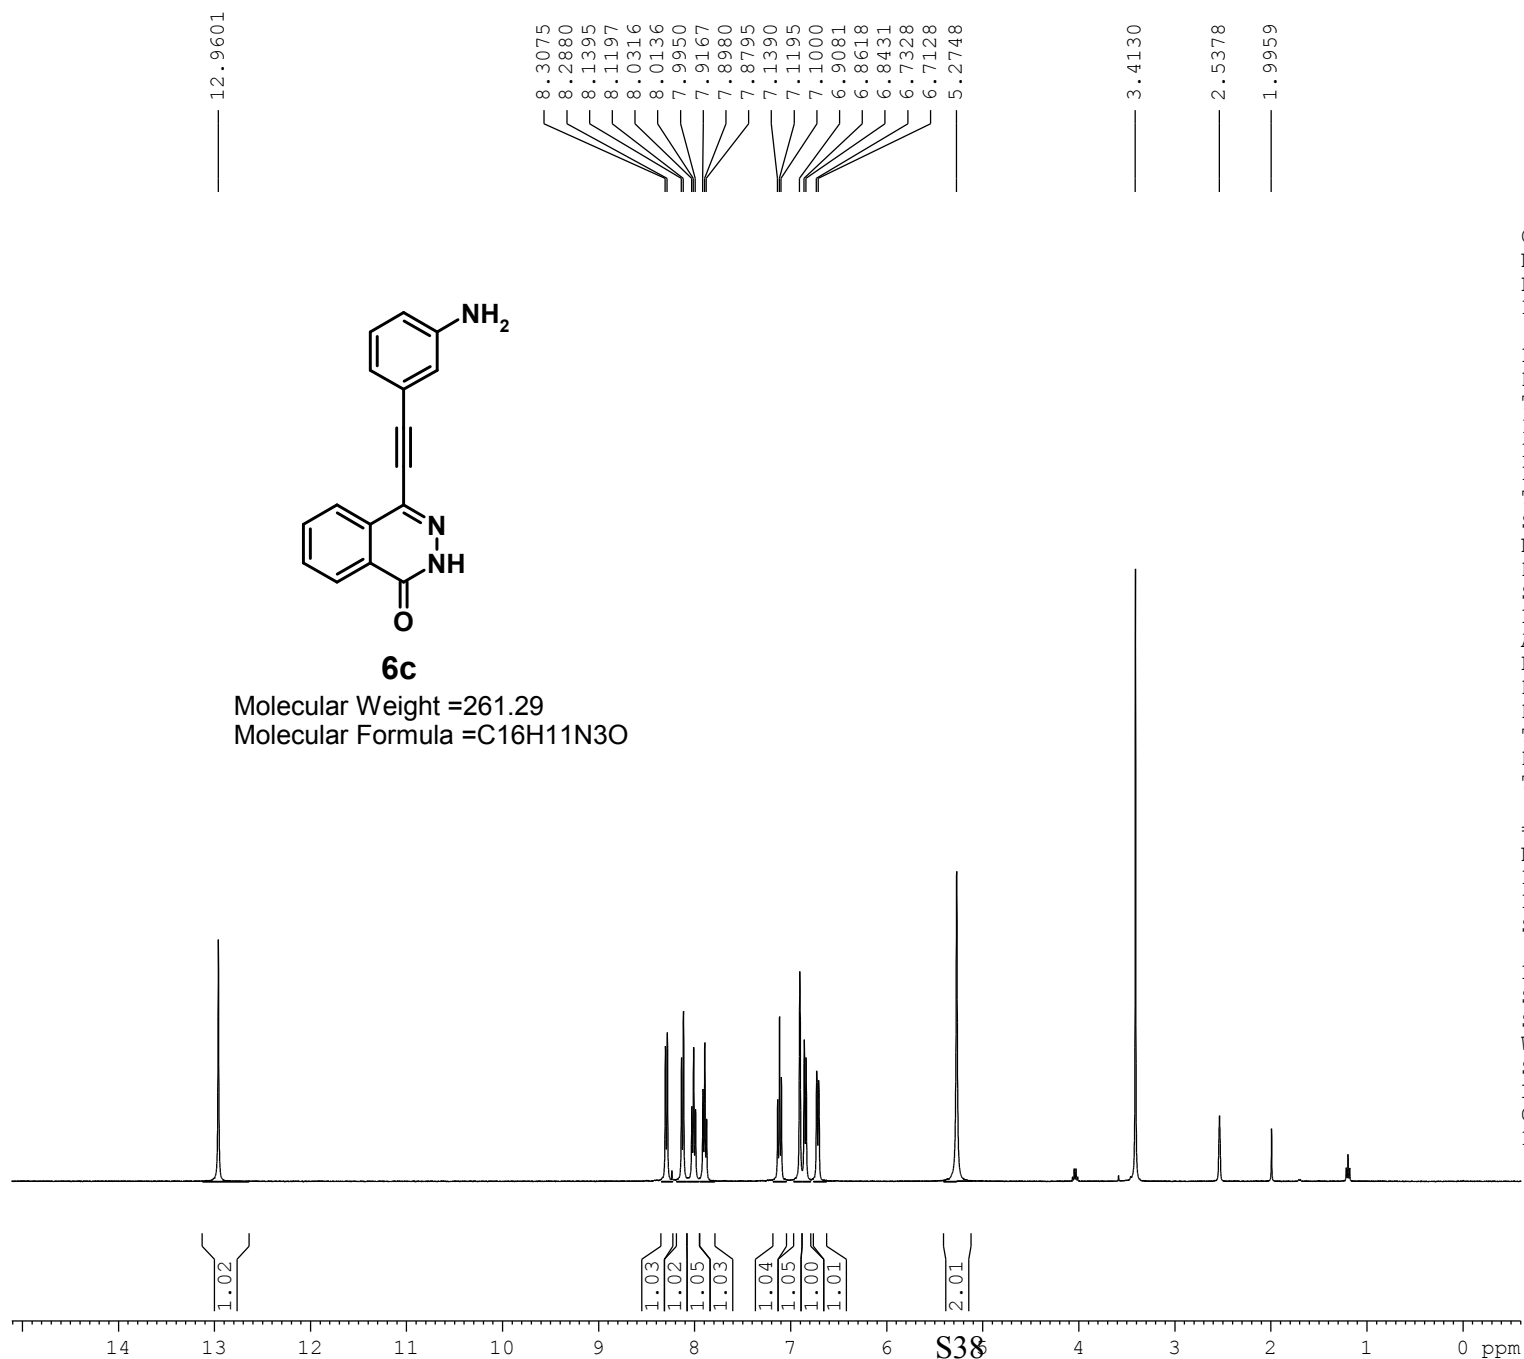

SRD-X

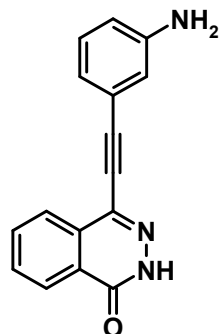

6c

Molecular Weight =261.29  
Molecular Formula =C16H11N3O

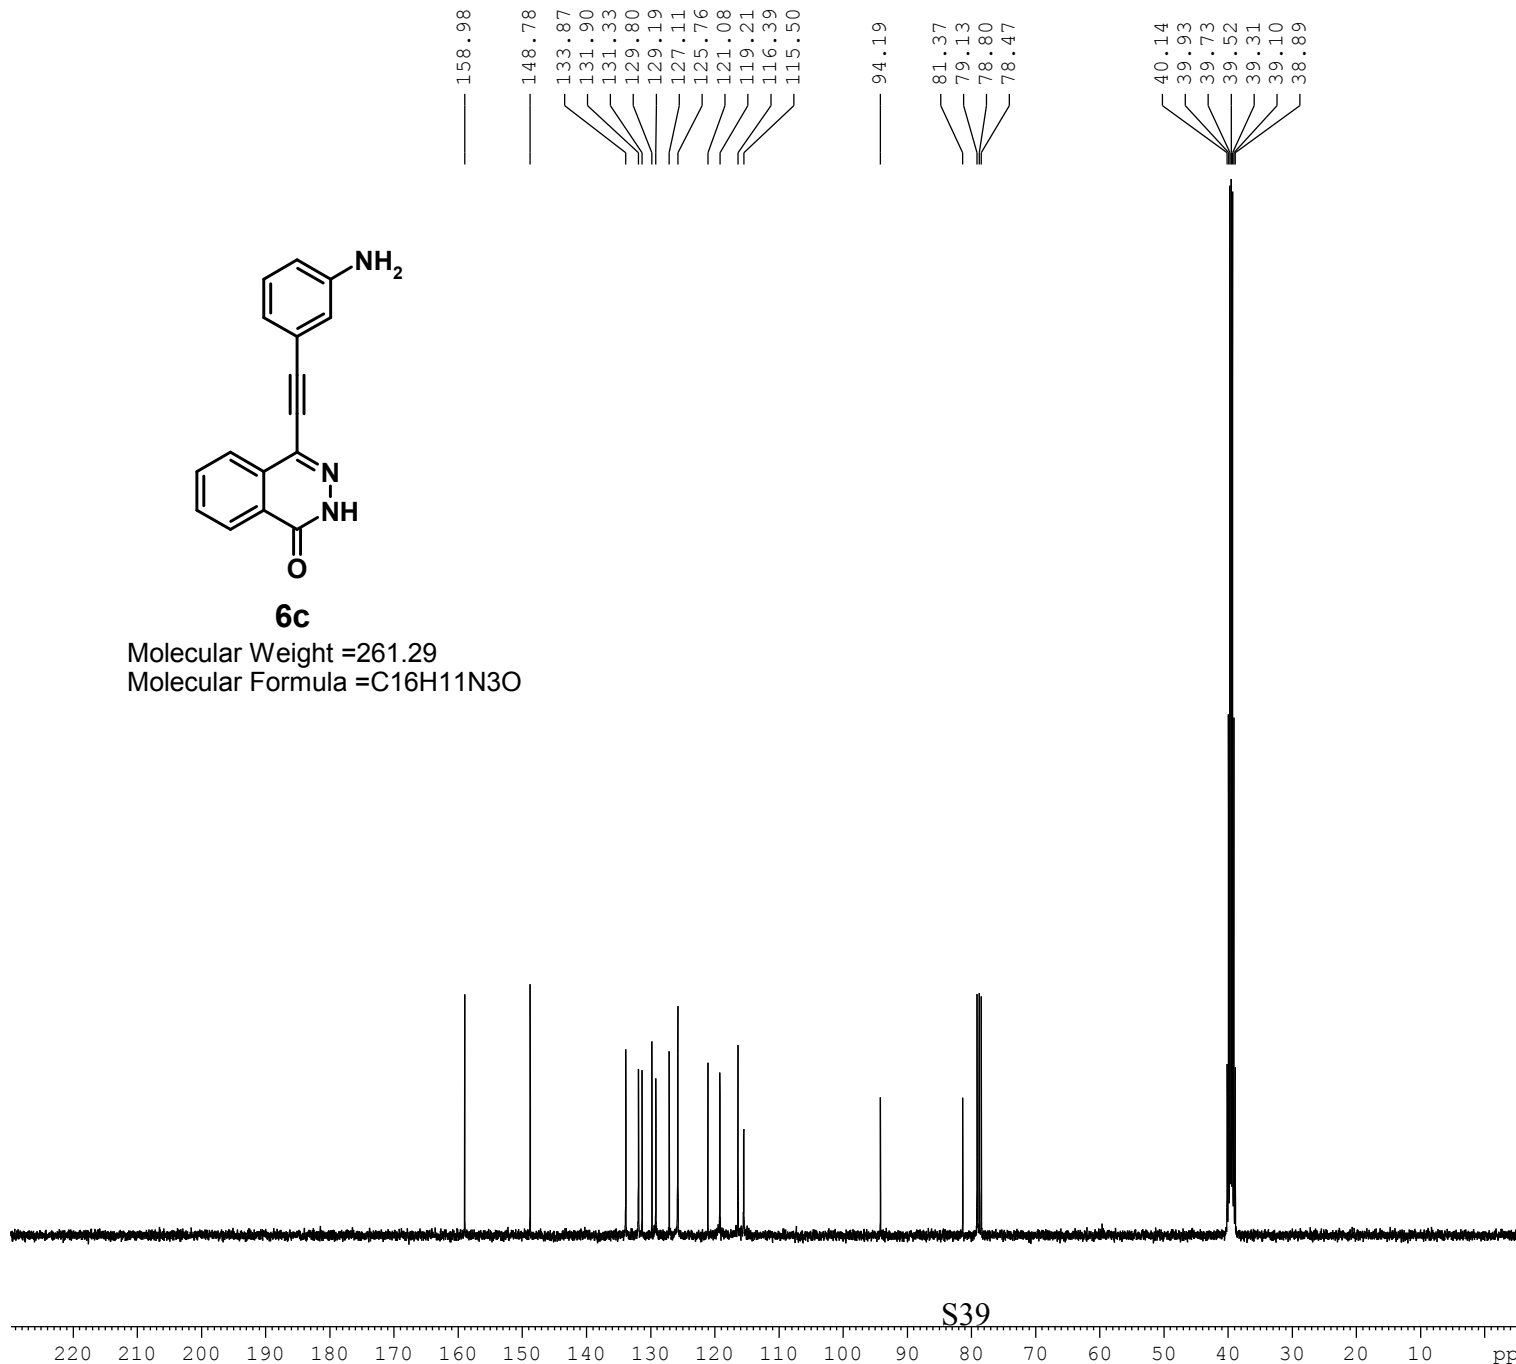

BRUKER  
AVANCE II 400 NMR  
Spectrometer  
SAIF  
Panjab University  
Chandigarh

Current Data Parameters  
NAME Jan01-2015  
EXPNO 121  
PROCNO 1

F2 - Acquisition Parameters  
Date 20150101  
Time 17.32  
INSTRUM spect  
PROBHD 5 mm PABBO BB-  
PULPROG zgpg30  
TD 65536  
SOLVENT DMSO  
NS 512  
DS 4  
SWH 29761.904 Hz  
FIDRES 0.454131 Hz  
AQ 1.1010548 sec  
RG 912  
DW 16.800 usec  
DE 6.00 usec  
TE 293.6 K  
D1 2.00000000 sec  
d11 0.03000000 sec  
DELTA 1.89999998 sec  
TD0 1

==== CHANNEL f1 =====  
NUC1 13C  
P1 9.60 usec  
PL1 -2.00 dB  
SFO1 100.6228298 MHz

==== CHANNEL f2 =====  
CPDPRG2 waltz16  
NUC2 1H  
PCPD2 80.00 usec  
PL2 -3.00 dB  
PL12 14.31 dB  
PL13 18.00 dB  
SFO2 400.1316005 MHz

F2 - Processing parameters  
SI 32768  
SF 100.6128193 MHz  
WDW EM  
SSB 0  
LB 1.00 Hz  
GB 0  
PC 1.40

SRD-S

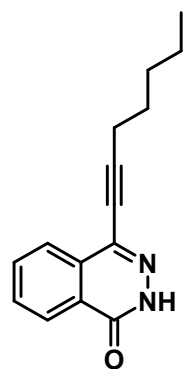

6d

Molecular Weight =240.31  
Molecular Formula =C<sub>15</sub>H<sub>16</sub>N<sub>2</sub>O

BRUKER  
AVANCE II 400 NMR  
Spectrometer  
SAIF  
Panjab University  
Chandigarh

Current Data Parameters  
NAME Jan01-2015  
EXPNO 90  
PROCNO 1

F2 - Acquisition Parameters  
Date\_ 20150101  
Time\_ 15.22  
INSTRUM spect  
PROBHD 5 mm PABBO BB-  
PULPROG zg30  
TD 65536  
SOLVENT DMSO  
NS 8  
DS 2  
SWH 12019.230 Hz  
FIDRES 0.183399 Hz  
AQ 2.7263477 sec  
RG 362  
DW 41.600 usec  
DE 6.00 usec  
TE 293.4 K  
D1 1.0000000 sec  
TD0 1

==== CHANNEL f1 =====  
NUC1 1H  
P1 10.90 usec  
PL1 -3.00 dB  
SFO1 400.1324710 MHz

F2 - Processing parameters  
SI 32768  
SF 400.1299851 MHz  
WDW EM  
SSB 0  
LB 0.30 Hz  
GB 0  
PC 1.00

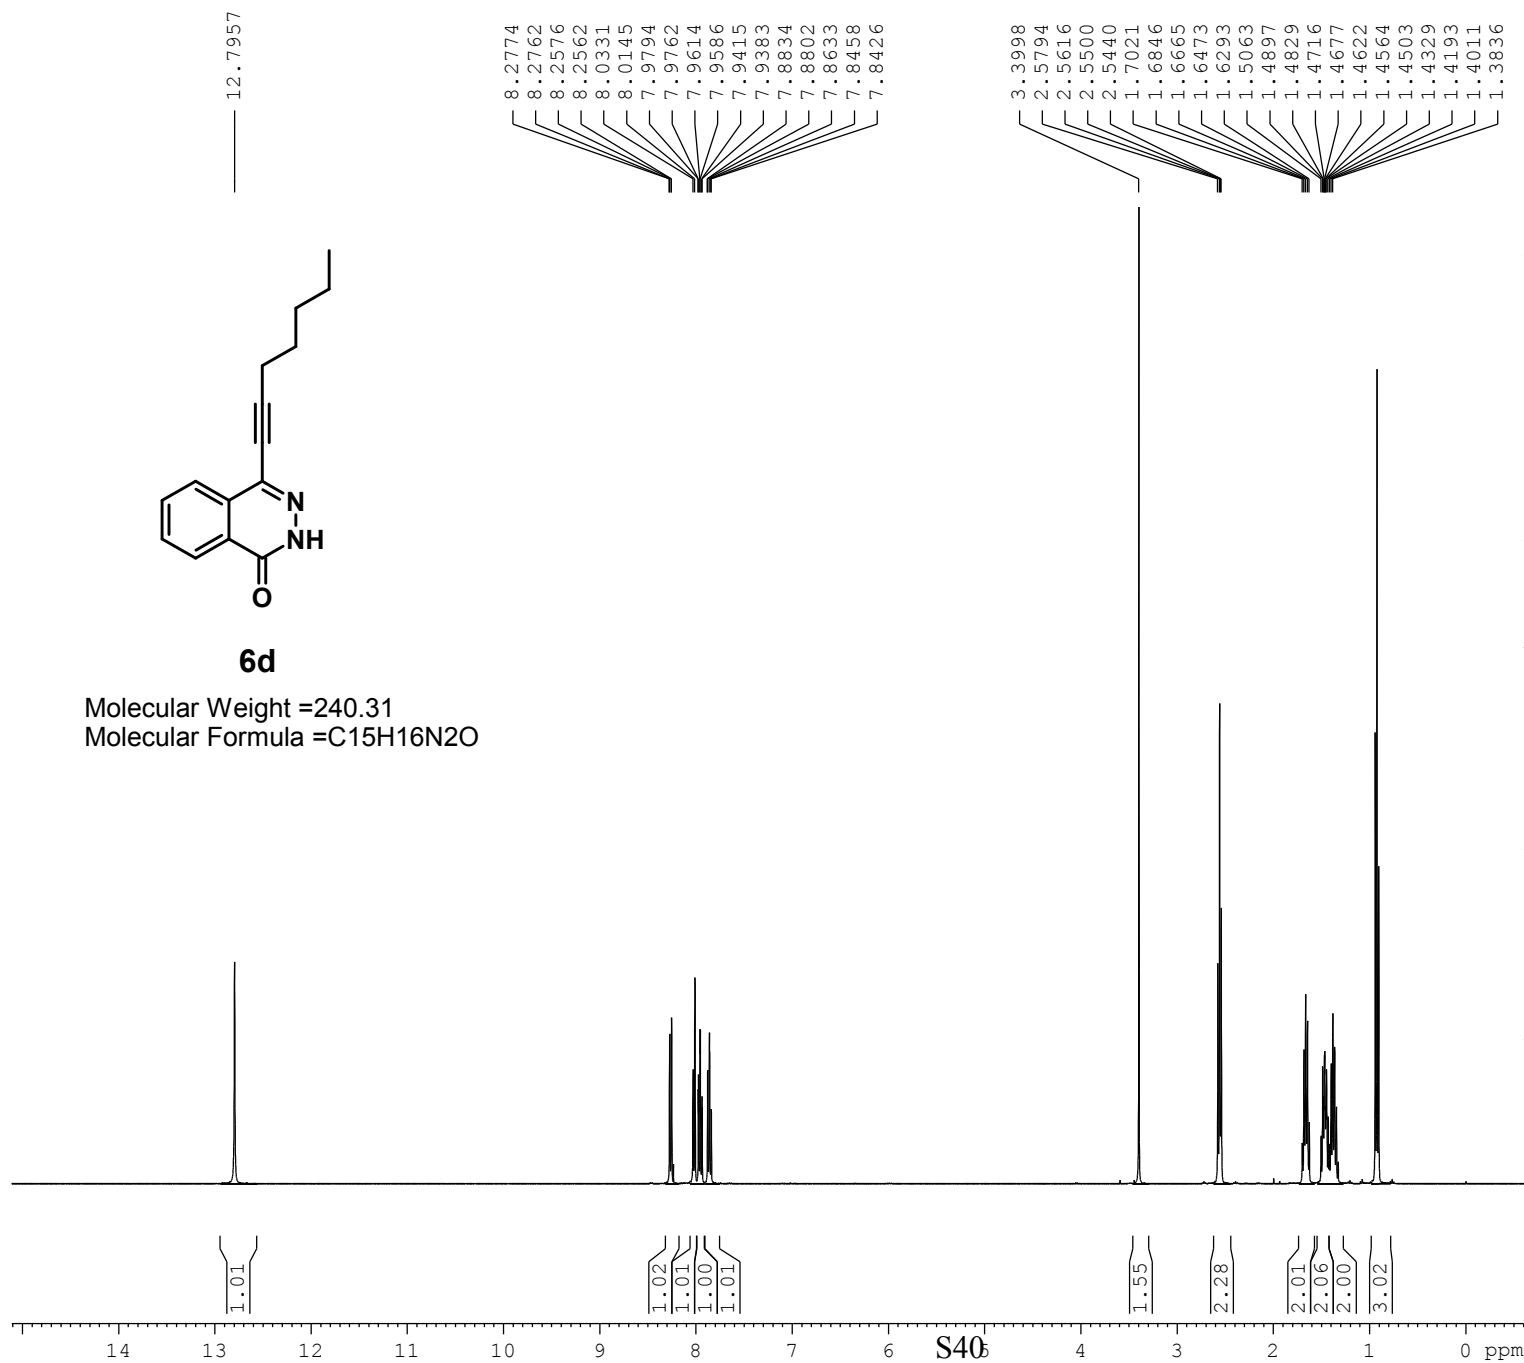



SRD-S

BRUKER  
AVANCE II 400 NMR  
Spectrometer  
SAIF  
Panjab University  
Chandigarh

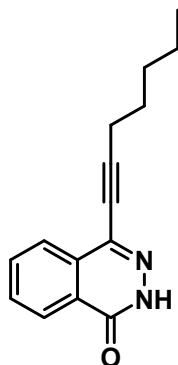

6d

Molecular Weight =240.31  
Molecular Formula =C<sub>15</sub>H<sub>16</sub>N<sub>2</sub>O

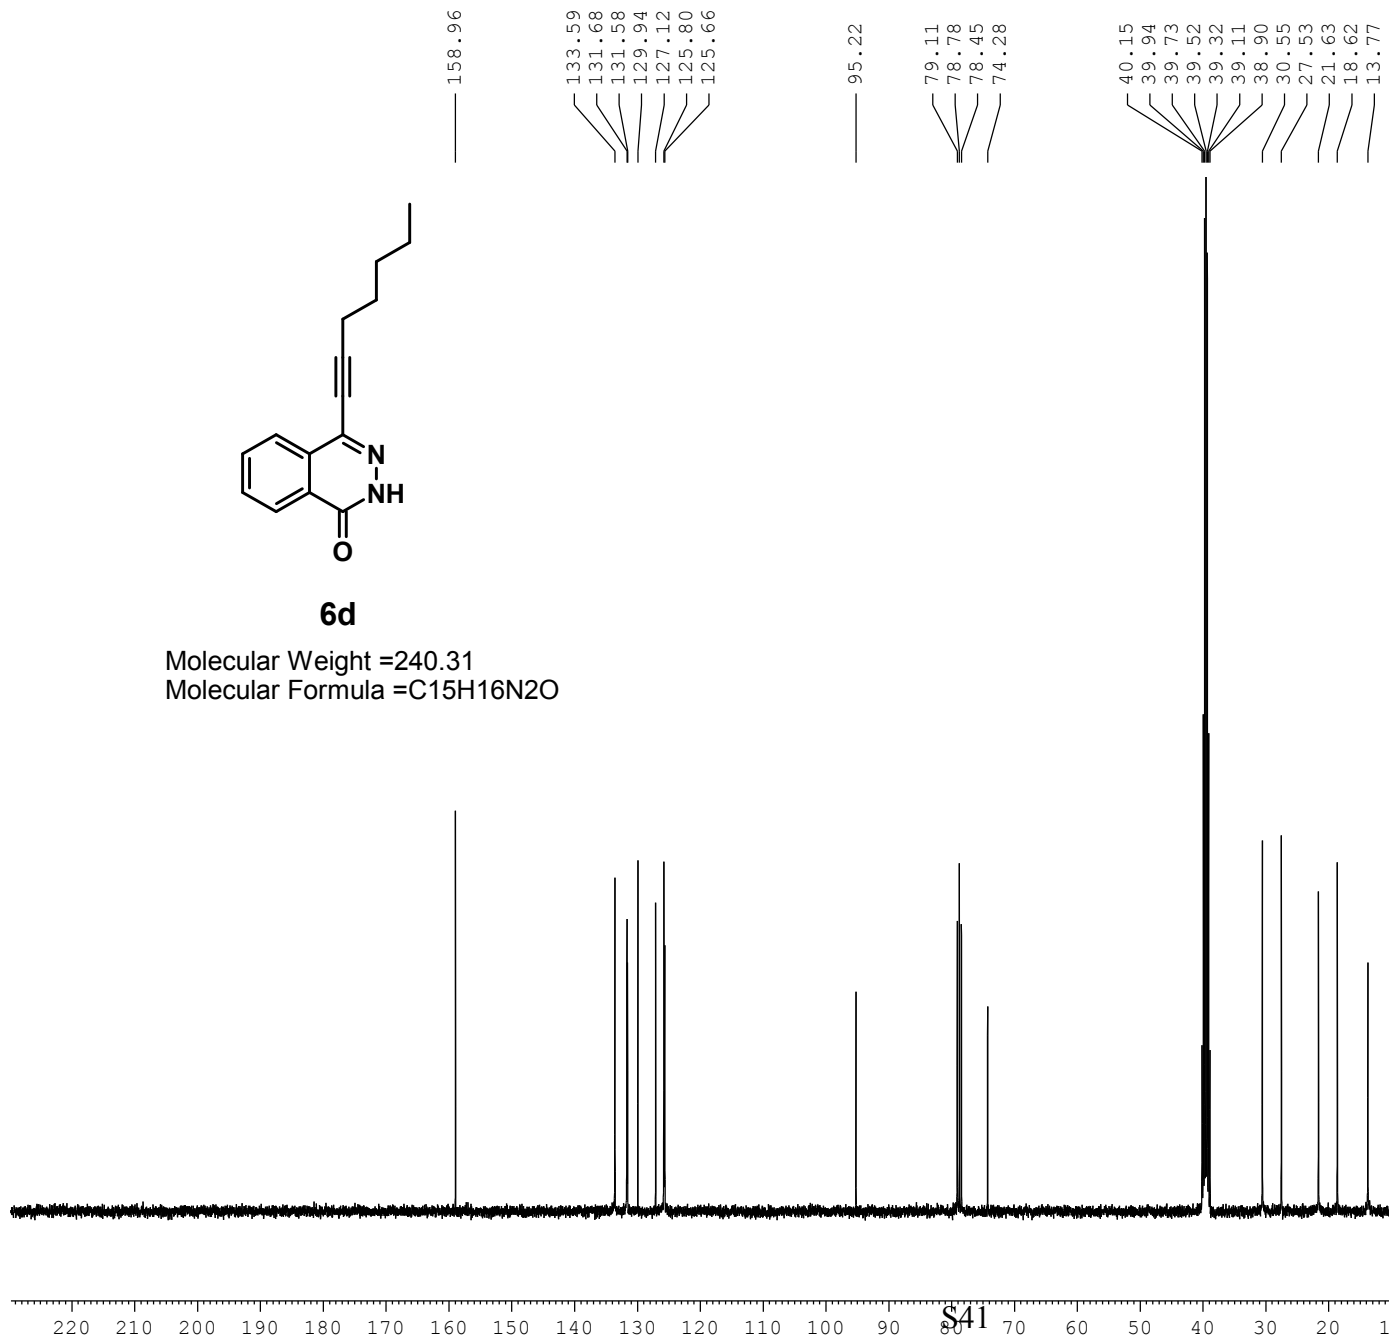

Current Data Parameters  
NAME Jan01-2015  
EXPNO 91  
PROCNO 1

F2 - Acquisition Parameters  
Date\_ 20150101  
Time\_ 15.51  
INSTRUM spect  
PROBHD 5 mm PABBO BB-  
PULPROG zgpg30  
TD 65536  
SOLVENT DMSO  
NS 512  
DS 4  
SWH 29761.904 Hz  
FIDRES 0.454131 Hz  
AQ 1.1010548 sec  
RG 1030  
DW 16.800 usec  
DE 6.00 usec  
TE 293.5 K  
D1 2.00000000 sec  
d11 0.03000000 sec  
DELTA 1.89999998 sec  
TD0 1

==== CHANNEL f1 =====  
NUC1 13C  
P1 9.60 usec  
PL1 -2.00 dB  
SFO1 100.6228298 MHz

==== CHANNEL f2 =====  
CPDPRG2 waltz16  
NUC2 1H  
PCPD2 80.00 usec  
PL2 -3.00 dB  
PL12 14.31 dB  
PL13 18.00 dB  
SFO2 400.1316005 MHz

F2 - Processing parameters  
SI 32768  
SF 100.6128193 MHz  
WDW EM  
SSB 0  
LB 1.00 Hz  
GB 0  
PC 1.40

avtar\_saifpu@yahoo.co.in

SRD-R

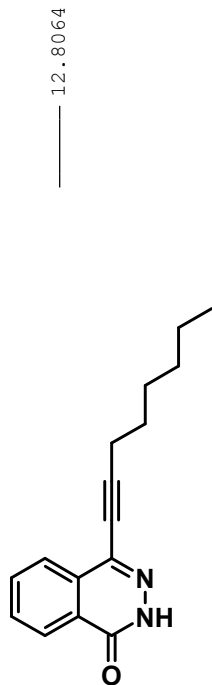

6e

Molecular Weight =254.33  
Molecular Formula =C<sub>16</sub>H<sub>18</sub>N<sub>2</sub>O

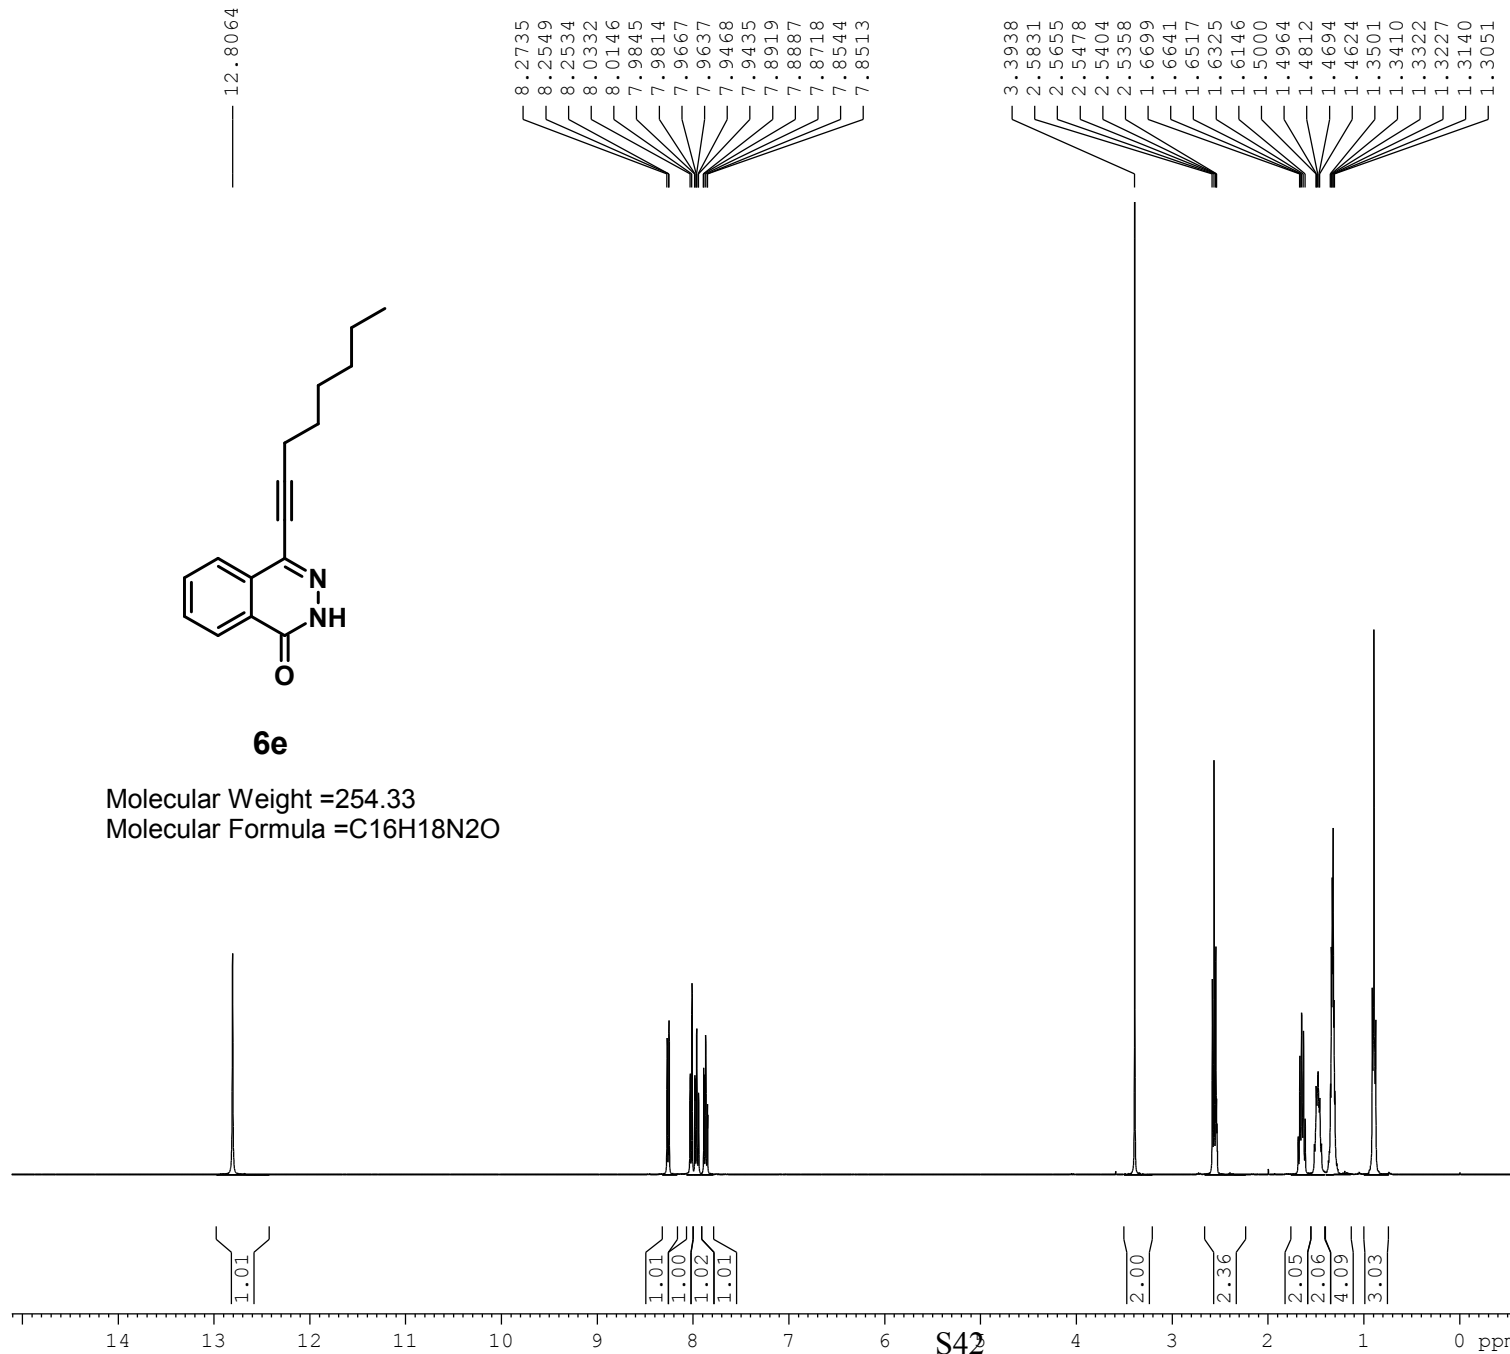

BRUKER  
AVANCE II 400 NMR  
Spectrometer  
SAIF  
Panjab University  
Chandigarh

Current Data Parameters  
NAME Jan01-2015  
EXPNO 80  
PROCNO 1

F2 - Acquisition Parameters  
Date\_ 20150101  
Time\_ 14.54  
INSTRUM spect  
PROBHD 5 mm PABBO BB-  
PULPROG zg30  
TD 65536  
SOLVENT DMSO  
NS 8  
DS 2  
SWH 12019.230 Hz  
FIDRES 0.183399 Hz  
AQ 2.7263477 sec  
RG 144  
DW 41.600 usec  
DE 6.00 usec  
TE 293.3 K  
D1 1.00000000 sec  
TD0 1

==== CHANNEL f1 =====  
NUC1 1H  
P1 10.90 usec  
PL1 -3.00 dB  
SFO1 400.1324710 MHz

F2 - Processing parameters  
SI 32768  
SF 400.1299874 MHz  
WDW EM  
SSB 0  
LB 0.30 Hz  
GB 0  
PC 1.00

SRD-R

BRUKER  
AVANCE II 400 NMR  
Spectrometer  
SAIF  
Panjab University  
Chandigarh

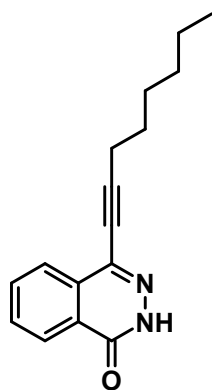

6e

Molecular Weight =254.33  
Molecular Formula =C16H18N2O

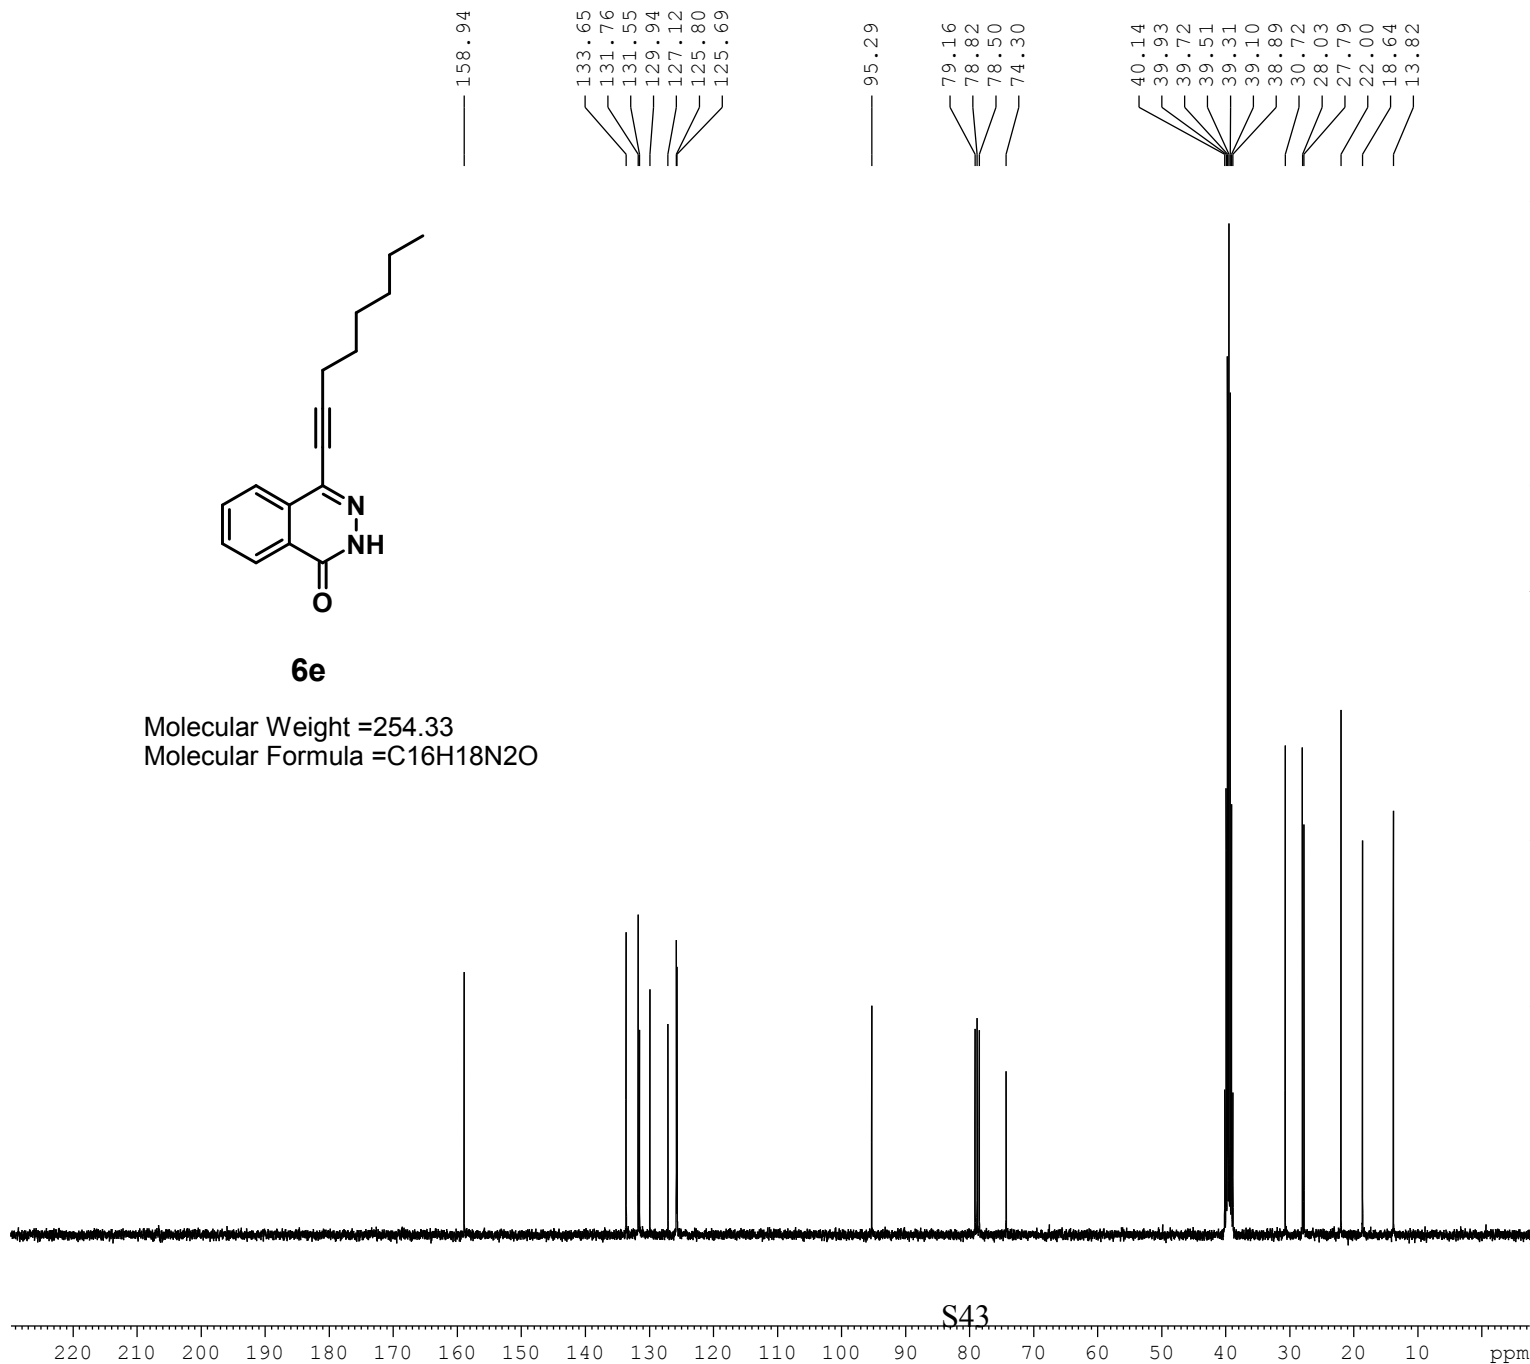

Current Data Parameters  
NAME Jan01-2015  
EXPNO 81  
PROCNO 1

F2 - Acquisition Parameters  
Date\_ 20150101  
Time\_ 15.17  
INSTRUM spect  
PROBHD 5 mm PABBO BB-  
PULPROG zgpg30  
TD 65536  
SOLVENT DMSO  
NS 418  
DS 4  
SWH 29761.904 Hz  
FIDRES 0.454131 Hz  
AQ 1.1010548 sec  
RG 1030  
DW 16.800 usec  
DE 6.00 usec  
TE 293.8 K  
D1 2.00000000 sec  
d11 0.03000000 sec  
DELTA 1.89999998 sec  
TD0 1

==== CHANNEL f1 =====  
NUC1 13C  
P1 9.60 usec  
PL1 -2.00 dB  
SFO1 100.6228298 MHz

==== CHANNEL f2 =====  
CPDPRG2 waltz16  
NUC2 1H  
PCPD2 80.00 usec  
PL2 -3.00 dB  
PL12 14.31 dB  
PL13 18.00 dB  
SFO2 400.1316005 MHz

F2 - Processing parameters  
SI 32768  
SF 100.6128193 MHz  
WDW EM  
SSB 0  
LB 1.00 Hz  
GB 0  
PC 1.40

avtar\_saifpu@yahoo.co.in

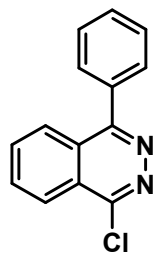

**7a**

Molecular Weight =240.69  
 Molecular Formula =C<sub>14</sub>H<sub>9</sub>ClN<sub>2</sub>

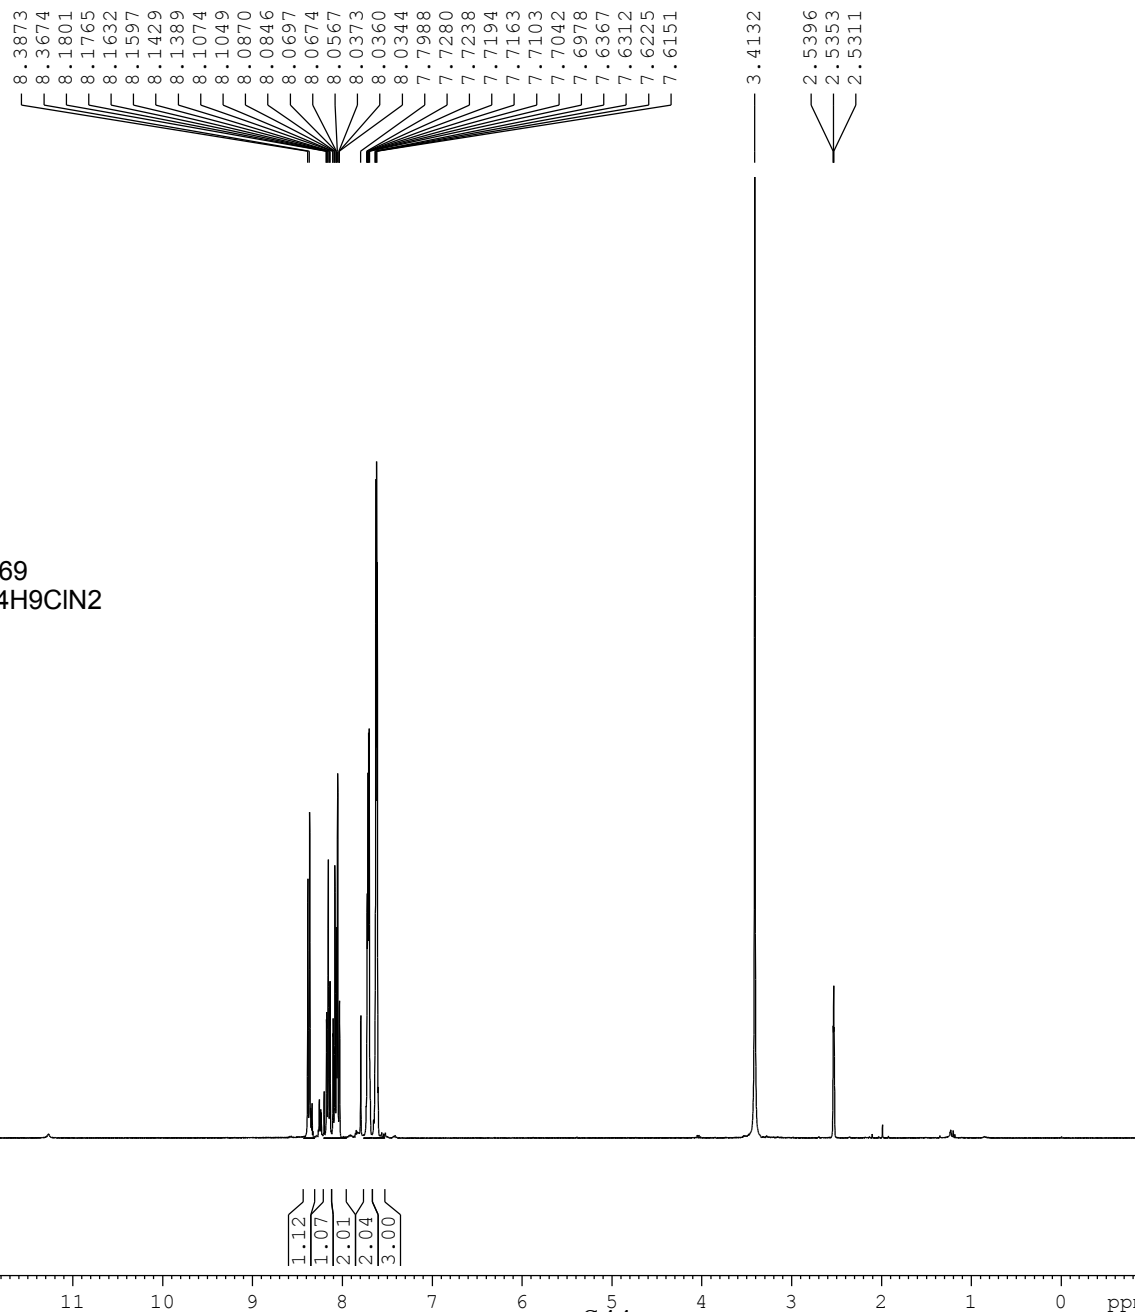

BRUKER  
 AVANCE II 400 NMR  
 Spectrometer  
 SAIF  
 Panjab University  
 Chandigarh

Current Data Parameters  
 NAME Nov29-2014  
 EXPNO 260  
 PROCNO 1

F2 - Acquisition Parameters  
 Date\_ 20141130  
 Time\_ 5.47  
 INSTRUM spect  
 PROBHD 5 mm PABBO BB-  
 PULPROG zg30  
 TD 65536  
 SOLVENT DMSO  
 NS 16  
 DS 2  
 SWH 12019.230 Hz  
 FIDRES 0.183399 Hz  
 AQ 2.7263477 sec  
 RG 456  
 DW 41.600 usec  
 DE 6.00 usec  
 TE 295.9 K  
 D1 1.00000000 sec  
 TD0 1

===== CHANNEL f1 =====  
 NUC1 1H  
 P1 10.90 usec  
 PL1 -3.00 dB  
 SFO1 400.1324710 MHz

F2 - Processing parameters  
 SI 32768  
 SF 400.1299896 MHz  
 WDW EM  
 SSB 0  
 LB 0.30 Hz  
 GB 0  
 PC 1.00

BRUKER  
AVANCE II 400 NMR  
Spectrometer  
SAIF  
Panjab University  
Chandigarh

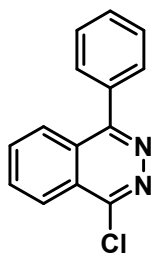

7a

Molecular Weight =240.69  
Molecular Formula =C14H9ClN2

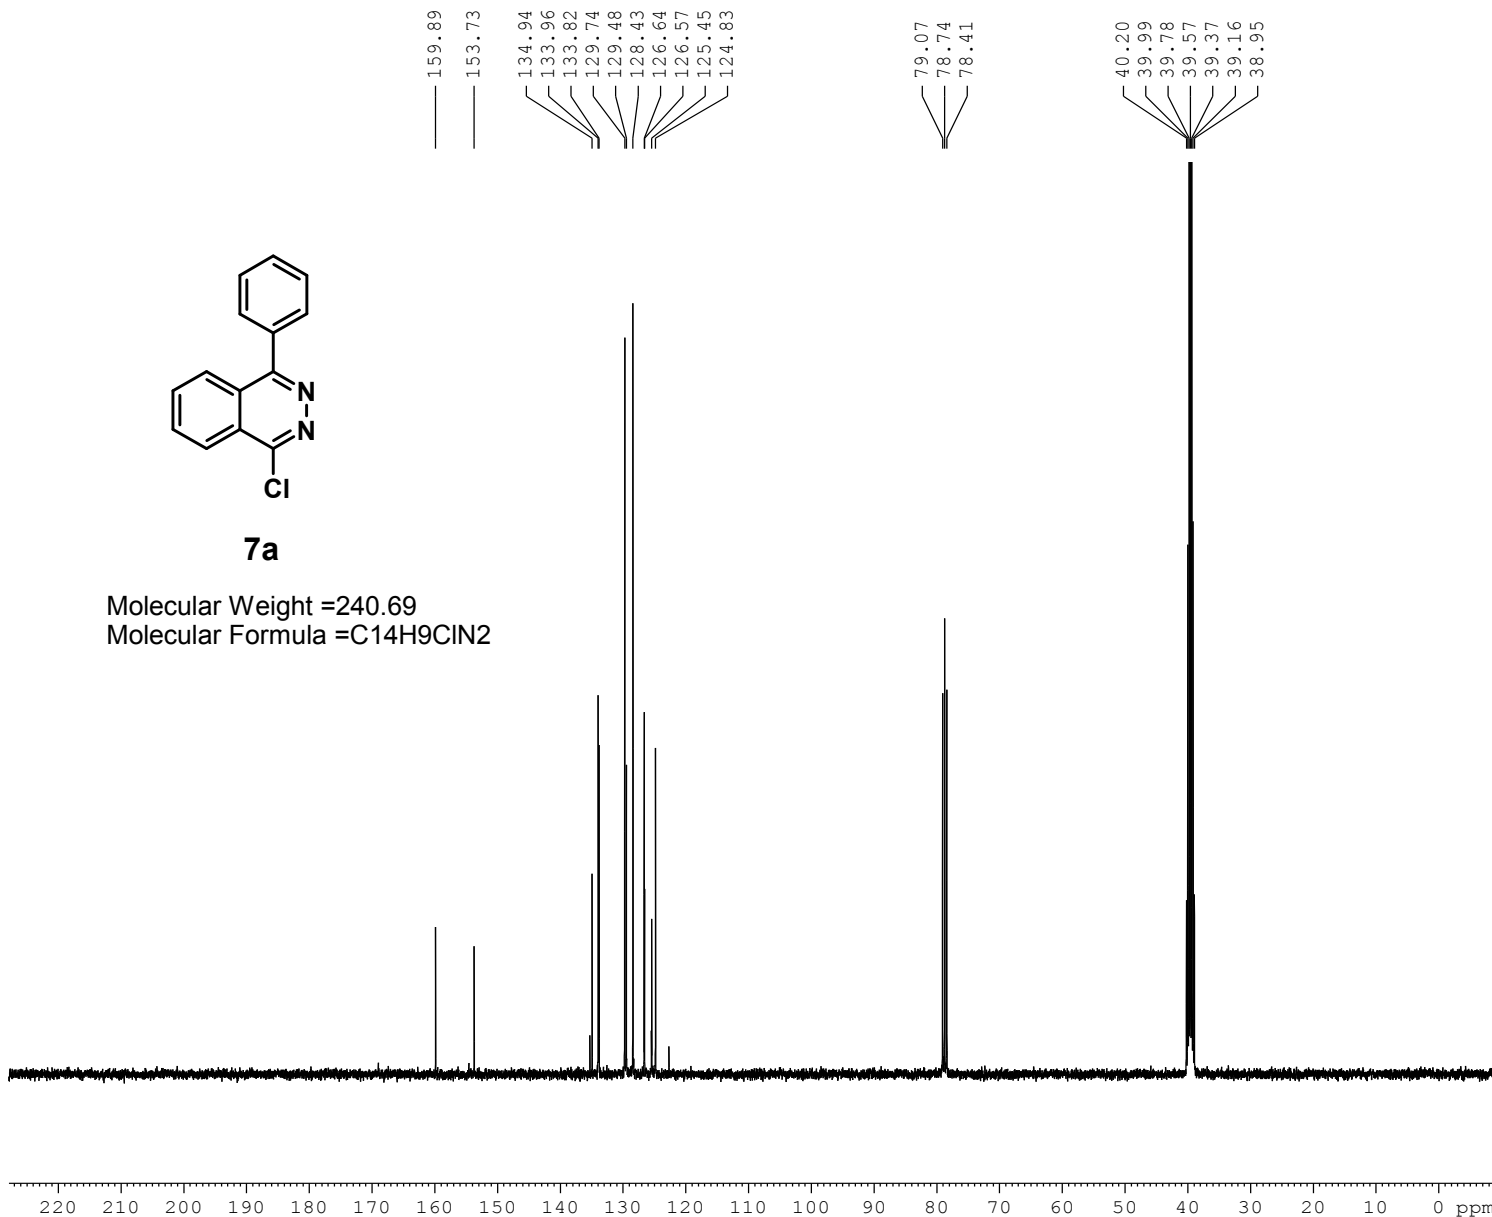

Current Data Parameters  
NAME Nov29-2014  
EXPNO 261  
PROCNO 1

F2 - Acquisition Parameters  
Date\_ 20141130  
Time 6.43  
INSTRUM spect  
PROBHD 5 mm PABBO BB-  
PULPROG zgpg30  
TD 65536  
SOLVENT DMSO  
NS 1024  
DS 4  
SWH 29761.904 Hz  
FIDRES 0.454131 Hz  
AQ 1.1010548 sec  
RG 1030  
DW 16.800 usec  
DE 6.00 usec  
TE 296.2 K  
D1 2.00000000 sec  
d11 0.03000000 sec  
DELTA 1.89999998 sec  
TD0 1

==== CHANNEL f1 =====  
NUC1 13C  
P1 9.60 usec  
PL1 -2.00 dB  
SFO1 100.6228298 MHz

==== CHANNEL f2 =====  
CPDPRG2 waltz16  
NUC2 1H  
PCPD2 80.00 usec  
PL2 -3.00 dB  
PL12 14.31 dB  
PL13 18.00 dB  
SFO2 400.1316005 MHz

F2 - Processing parameters  
SI 32768  
SF 100.6128193 MHz  
WDW EM  
SSB 0  
LB 1.00 Hz  
GB 0  
PC 1.40

avtar\_saifpu@yahoo.co.in

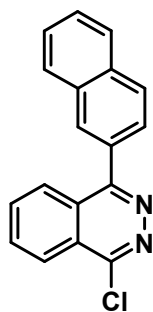

**7b**

Molecular Weight =290.75  
 Molecular Formula =C18H11ClN2

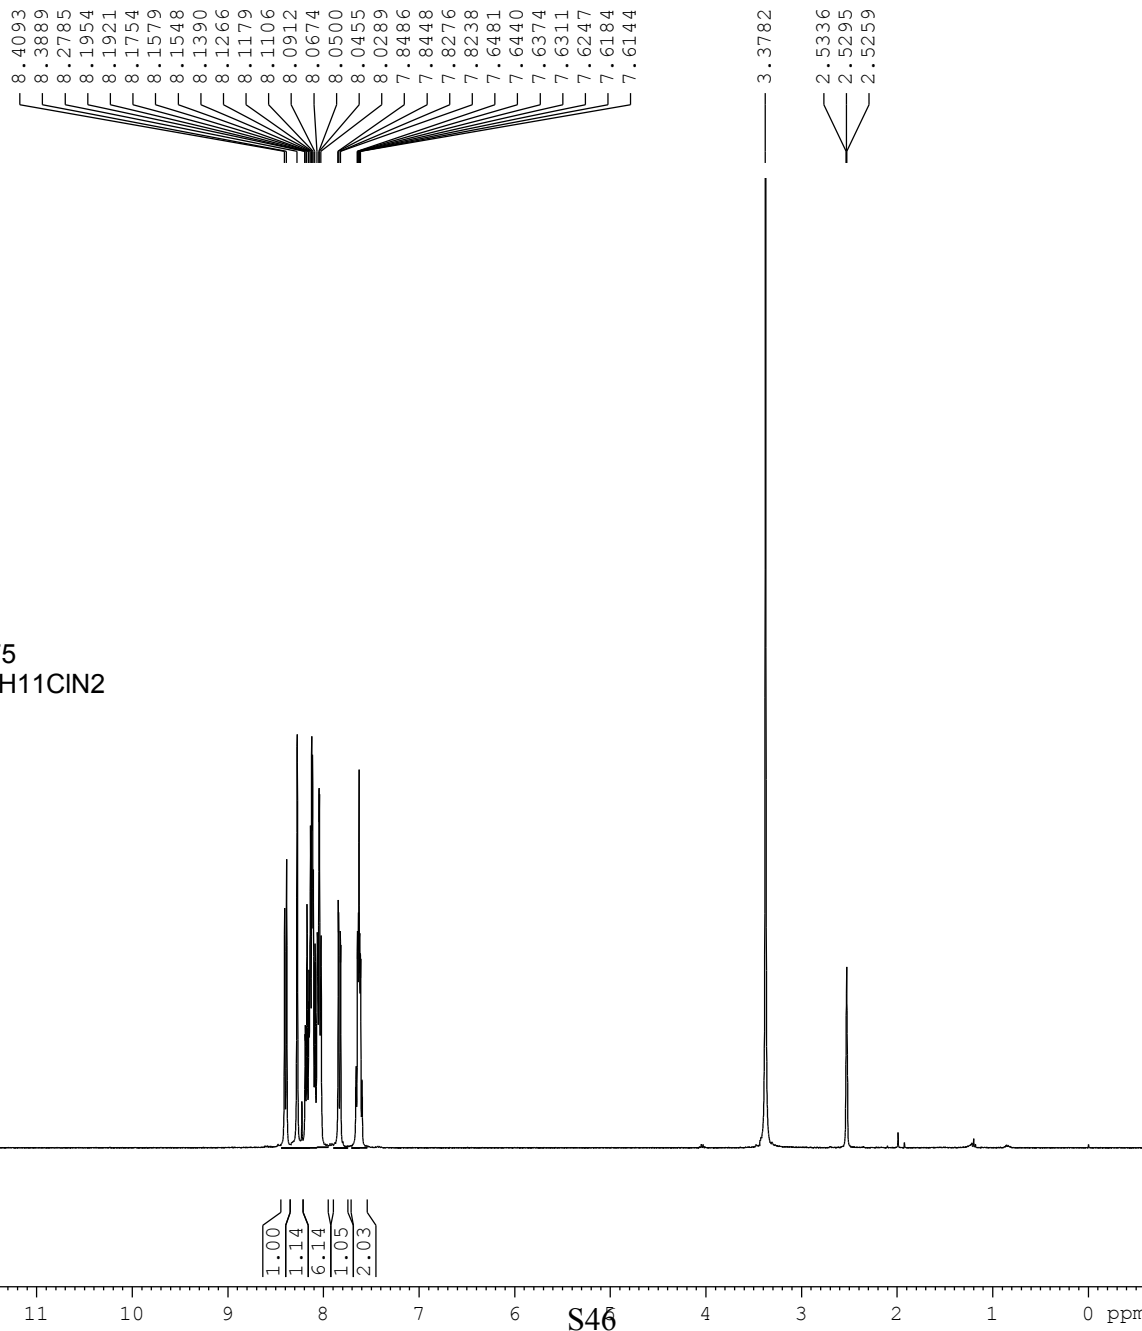

BRUKER  
 AVANCE II 400 NMR  
 Spectrometer  
 SAIF  
 Panjab University  
 Chandigarh

Current Data Parameters  
 NAME Jan01-2015  
 EXPNO 70  
 PROCNO 1

F2 - Acquisition Parameters  
 Date\_ 20150101  
 Time 14.31  
 INSTRUM spect  
 PROBHD 5 mm PABBO BB-  
 PULPROG zg30  
 TD 65536  
 SOLVENT DMSO  
 NS 8  
 DS 2  
 SWH 12019.230 Hz  
 FIDRES 0.183399 Hz  
 AQ 2.7263477 sec  
 RG 287  
 DW 41.600 usec  
 DE 6.00 usec  
 TE 293.2 K  
 D1 1.00000000 sec  
 TD0 1

==== CHANNEL f1 =====  
 NUC1 1H  
 P1 10.90 usec  
 PL1 -3.00 dB  
 SFO1 400.1324710 MHz

F2 - Processing parameters  
 SI 32768  
 SF 400.1299917 MHz  
 WDW EM  
 SSB 0  
 LB 0.30 Hz  
 GB 0  
 PC 1.00

BRUKER  
AVANCE II 400 NMR  
Spectrometer  
SAIF  
Panjab University  
Chandigarh

159.89  
153.75  
134.10  
133.90  
133.11  
132.45  
132.38  
129.65  
128.38  
128.08  
127.58  
127.13  
126.94  
126.81  
126.69  
126.65  
125.47  
124.88

79.12  
78.79  
78.46

40.18  
39.97  
39.76  
39.55  
39.34  
39.13  
38.93

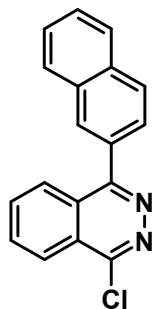

7b

Molecular Weight =290.75  
Molecular Formula =C18H11ClN2

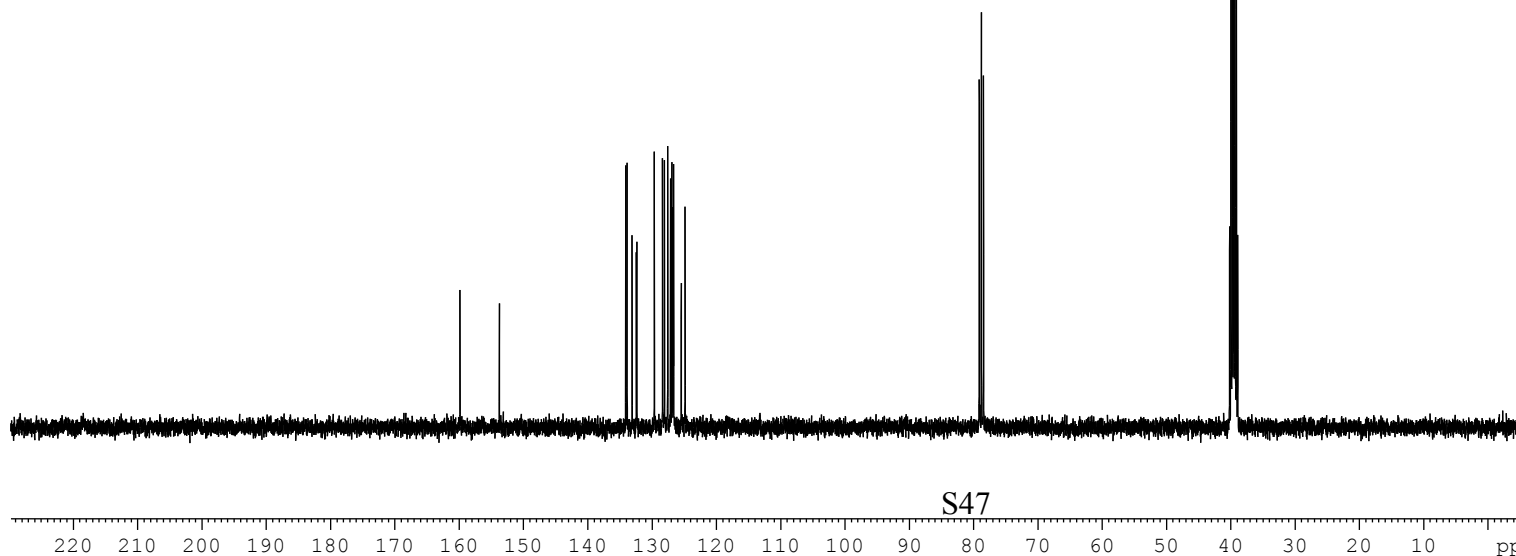

Current Data Parameters  
NAME Jan01-2015  
EXPNO 71  
PROCNO 1

F2 - Acquisition Parameters  
Date\_ 20150101  
Time\_ 14.35  
INSTRUM spect  
PROBHD 5 mm PABBO BB-  
PULPROG zgpg30  
TD 65536  
SOLVENT DMSO  
NS 308  
DS 4  
SWH 29761.904 Hz  
FIDRES 0.454131 Hz  
AQ 1.1010548 sec  
RG 1030  
DW 16.800 usec  
DE 6.00 usec  
TE 293.6 K  
D1 2.00000000 sec  
d11 0.03000000 sec  
DELTA 1.89999998 sec  
TDO 1

==== CHANNEL f1 =====  
NUC1 13C  
P1 9.60 usec  
PL1 -2.00 dB  
SFO1 100.6228298 MHz

==== CHANNEL f2 =====  
CPDPRG2 waltz16  
NUC2 1H  
PCPD2 80.00 usec  
PL2 -3.00 dB  
PL12 14.31 dB  
PL13 18.00 dB  
SFO2 400.1316005 MHz

F2 - Processing parameters  
SI 32768  
SF 100.6128193 MHz  
WDW EM  
SSB 0  
LB 1.00 Hz  
GB 0  
PC 1.40

SRD-K

8.2117  
8.1914  
7.9689  
7.9646  
7.9525  
7.9485  
7.9443  
7.9323  
7.9283  
7.9150  
7.9019  
7.8992  
7.8856  
7.8827  
7.8784  
7.6882  
7.6837  
7.6684  
7.6647  
7.6053  
7.6008  
7.5976  
7.5931  
7.5834  
7.5698  
7.5653  
7.5515  
7.5487

3.9428  
3.9320  
3.9201  
3.4866  
3.4752  
3.4641  
3.3885  
2.5336  
2.5292  
2.5247

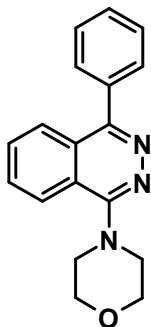

8a

Molecular Weight =291.36  
Molecular Formula =C<sub>18</sub>H<sub>17</sub>N<sub>3</sub>O

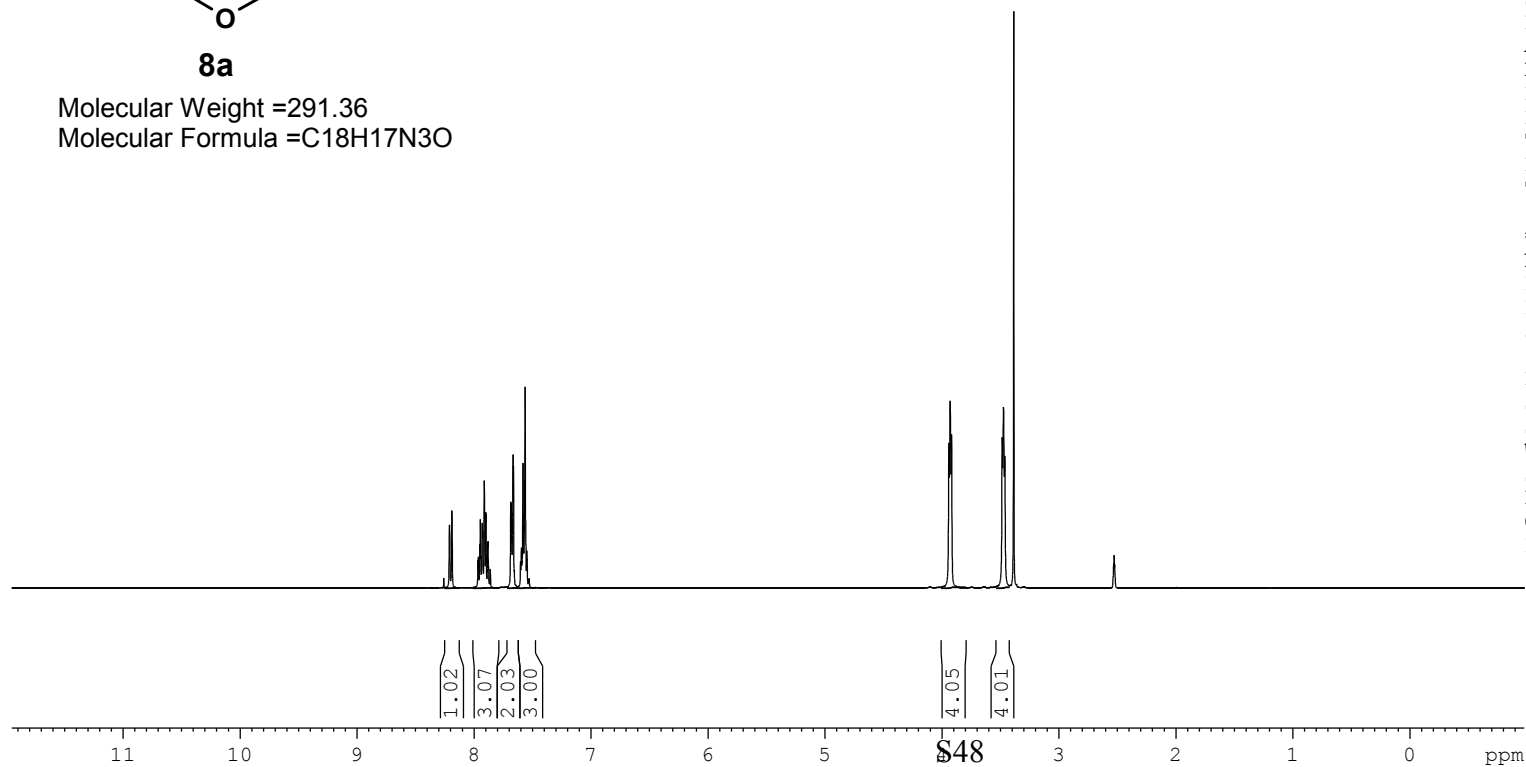

BRUKER  
AVANCE II 400 NMR  
Spectrometer  
SAIF  
Panjab University  
Chandigarh

Current Data Parameters  
NAME Jan01-2015  
EXPNO 10  
PROCNO 1

F2 - Acquisition Parameters  
Date\_ 20150101  
Time\_ 11.17  
INSTRUM spect  
PROBHD 5 mm PABBO BB-  
PULPROG zg30  
TD 65536  
SOLVENT DMSO  
NS 8  
DS 2  
SWH 12019.230 Hz  
FIDRES 0.183399 Hz  
AQ 2.7263477 sec  
RG 161  
DW 41.600 usec  
DE 6.00 usec  
TE 292.5 K  
D1 1.0000000 sec  
TD0 1

===== CHANNEL f1 =====  
NUC1 1H  
P1 10.90 usec  
PL1 -3.00 dB  
SFO1 400.1324710 MHz

F2 - Processing parameters  
SI 32768  
SF 400.1299918 MHz  
WDW EM  
SSB 0  
LB 0.30 Hz  
GB 0  
PC 1.00



SRD-K

BRUKER  
AVANCE II 400 NMR  
Spectrometer  
SAIF  
Panjab University  
Chandigarh

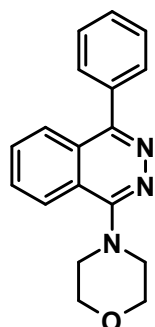

8a

Molecular Weight =291.36  
Molecular Formula =C18H17N3O

|        |        |       |       |       |
|--------|--------|-------|-------|-------|
| 158.76 | 136.27 | 79.17 | 66.12 | 51.30 |
| 155.84 | 131.92 | 78.84 |       | 40.16 |
|        | 131.55 | 78.51 |       | 39.95 |
|        | 129.56 |       |       | 39.74 |
|        | 128.70 |       |       | 39.53 |
|        | 128.30 |       |       | 39.32 |
|        | 126.54 |       |       | 39.11 |
|        | 126.18 |       |       | 38.90 |
|        | 124.40 |       |       |       |
|        | 120.75 |       |       |       |

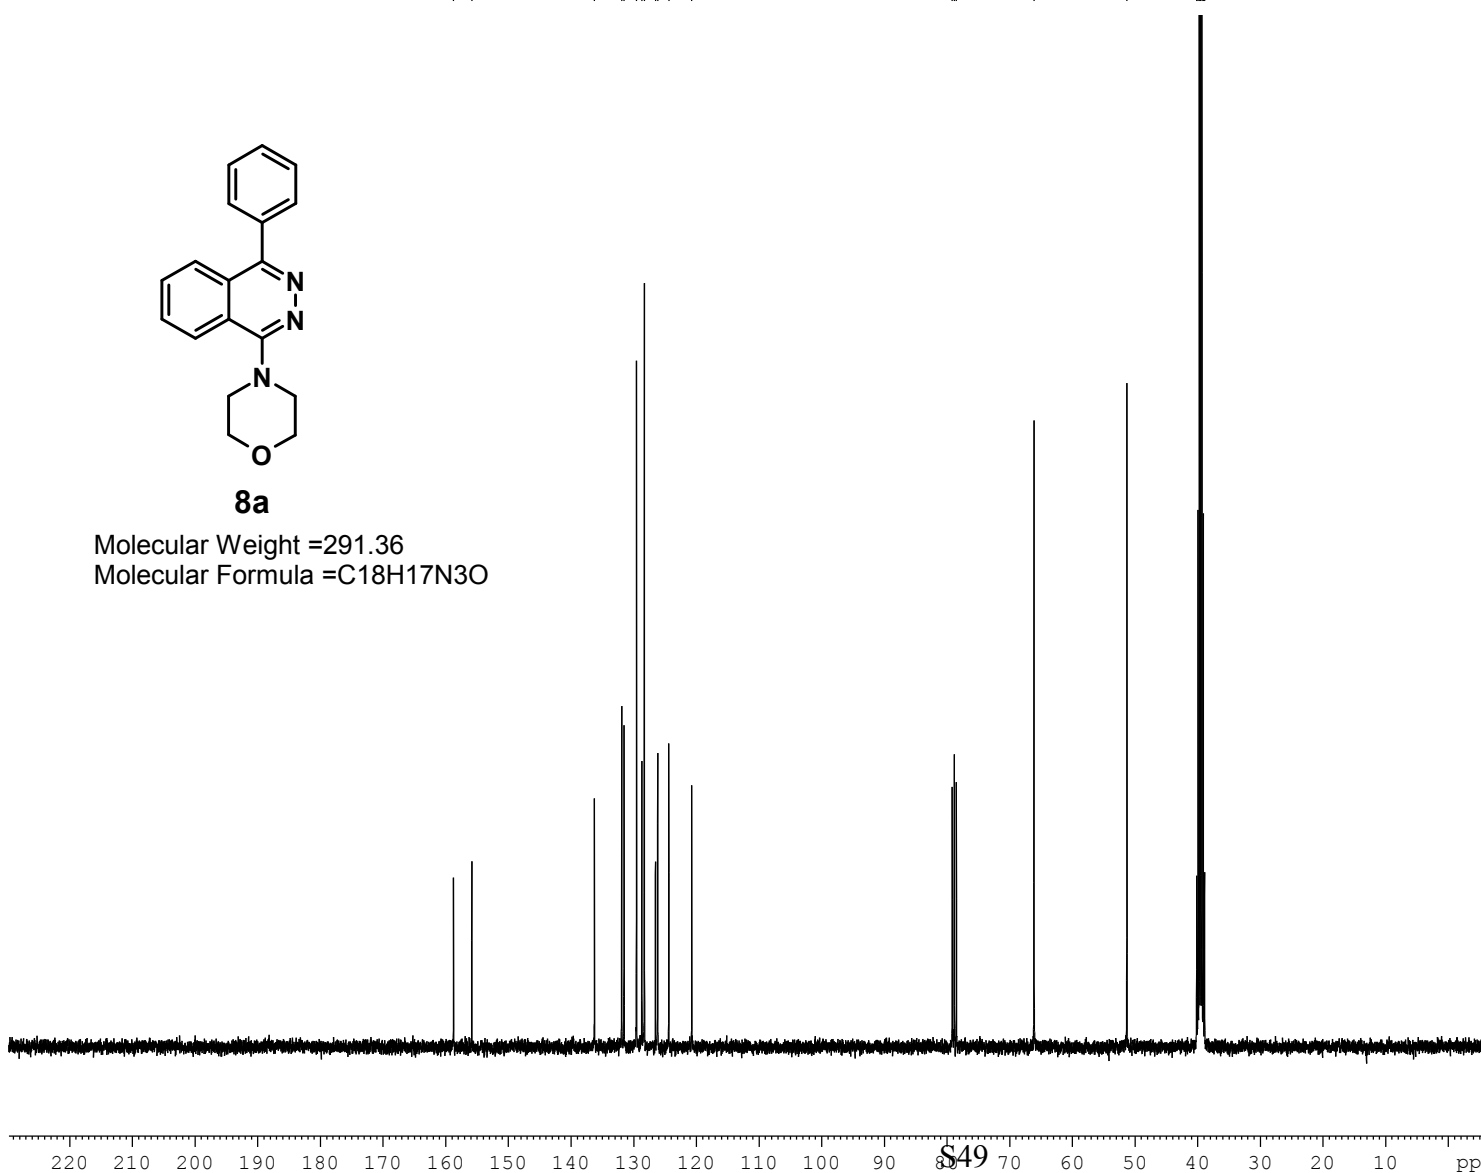

```

Current Data Parameters
NAME          Jan01-2015
EXPNO         11
PROCNO        1

F2 - Acquisition Parameters
Date_         20150101
Time          11.37
INSTRUM       spect
PROBHD        5 mm PABBO BB-
PULPROG       zgpg30
TD            65536
SOLVENT       DMSO
NS            348
DS            4
SWH           29761.904 Hz
FIDRES        0.454131 Hz
AQ            1.1010548 sec
RG            724
DW            16.800 usec
DE            6.00 usec
TE            293.1 K
D1            2.00000000 sec
d11           0.03000000 sec
DELTA         1.89999998 sec
TD0           1

===== CHANNEL f1 =====
NUC1          13C
P1            9.60 usec
PL1           -2.00 dB
SFO1          100.6228298 MHz

===== CHANNEL f2 =====
CPDPRG2       waltz16
NUC2          1H
PCPD2         80.00 usec
PL2           -3.00 dB
PL12          14.31 dB
PL13          18.00 dB
SFO2          400.1316005 MHz

F2 - Processing parameters
SI            32768
SF            100.6128193 MHz
WDW           EM
SSB           0
LB            1.00 Hz
GB            0
PC            1.40

```

SRD-Y  
 PROTON\_DepttChem DMSO {D:\AHMEDNAGAR} root 28

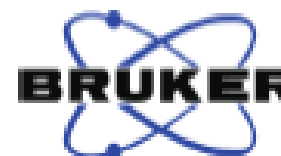

8.090  
 8.084  
 8.081  
 8.076  
 8.072  
 8.064  
 8.058  
 8.055  
 8.051  
 8.045  
 8.038  
 8.033  
 8.026  
 8.021  
 8.014  
 7.787  
 7.782  
 7.771  
 7.768  
 7.668  
 7.665  
 7.661  
 7.657  
 7.650  
 7.638  
 7.636  
 7.629  
 7.625  
 7.589  
 7.581  
 7.553  
 7.537  
 7.327  
 7.326  
 7.323  
 7.319  
 7.318  
 7.315  
 7.204  
 7.200  
 7.189  
 7.187  
 7.184  
 3.859  
 3.345  
 2.503  
 2.500  
 2.496

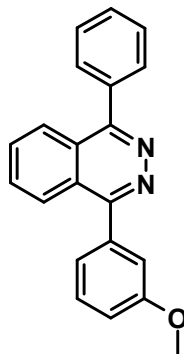

9a

Molecular Weight = 312.37  
 Molecular Formula = C<sub>21</sub>H<sub>16</sub>N<sub>2</sub>O

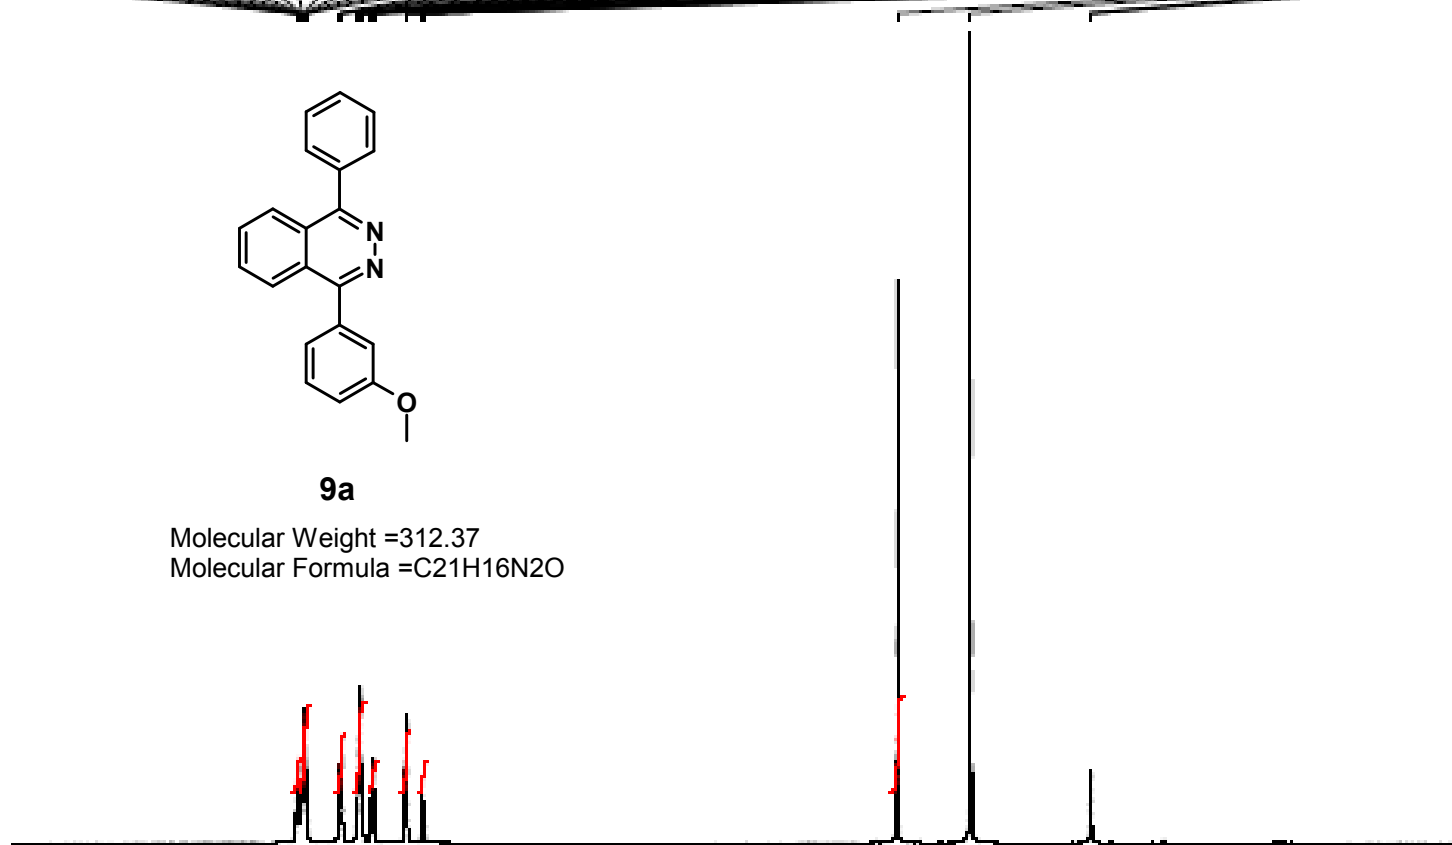

1.17  
 2.76  
 1.88  
 2.86  
 1.02  
 1.96  
 0.98

3.00

Current Data Parameters  
 NAME Dec31-2014  
 EXPNO 5  
 PROCNO 1

F2 - Acquisition Parameters  
 Date\_ 20141231  
 Time\_ 18.53  
 INSTRUM spect  
 PROBNM 5 mm PABBO BB/  
 PULPROG zg30  
 TD 65536  
 SOLVENT DMSO  
 NS 16  
 DS 2  
 SWH 10000.000 Hz  
 FIDRES 0.152588 Hz  
 AQ 3.2767999 sec  
 RG 96  
 DW 50.000 usec  
 DE 6.50 usec  
 TR 296.4 K  
 D1 1.00000000 sec  
 TDD 1

----- CHANNEL f1 -----  
 SFO1 500.1320885 MHz  
 NUQ1 1H  
 P1 9.22 usec  
 PLW1 22.00000000 W

F2 - Processing parameters  
 SI 65536  
 SF 500.1300035 MHz  
 MDW RM  
 SGB 0  
 LB 0.30 Hz  
 GB 0  
 PC 1.00

SRD-Y  
 C13CPD DMSO {D:\AHMEDNAGAR} root 2B

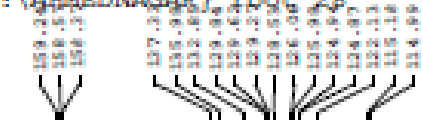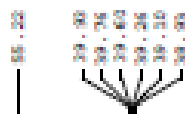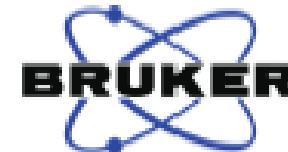

Current Data Parameters  
 NAME Dec31-2014  
 EXPNO 4  
 PROCNO 1

F2 - Acquisition Parameters  
 Date\_ 20141231  
 Time 17.03  
 INSTRUM spect  
 PROBRD 5 mm PABBO BB/  
 PULPROG zgpg30  
 TD 65536  
 SOLVENT DMSO  
 NS 800  
 DS 4  
 SWH 29761.904 Hz  
 FIDRES 0.454131 Hz  
 AQ 1.1010048 sec  
 RG 189.76  
 DW 16.800 usec  
 DE 6.50 usec  
 TE 298.2 K  
 D1 2.00000000 sec  
 D11 0.03000000 sec  
 TDD 1

===== CHANNEL F1 =====  
 SFO1 125.7703637 MHz  
 NUQ1 13C  
 P1 9.25 usec  
 PLW1 100.00000000 W

===== CHANNEL F2 =====  
 SFO2 500.1320005 MHz  
 NUQ2 1H  
 CPDPRG2 waltz16  
 PCPD2 80.00 usec  
 PLW2 22.00000000 W  
 PLW12 0.29222000 W  
 PLW13 0.18702000 W

F2 - Processing parameters  
 SI 32768  
 SF 125.7578569 MHz  
 WDW EM  
 SSB 0  
 LB 1.00 Hz  
 GB 0  
 PC 1.40

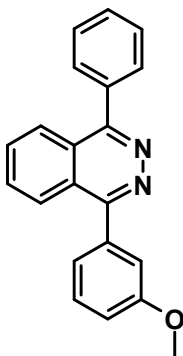

9a

Molecular Weight =312.37  
 Molecular Formula =C21H16N2O

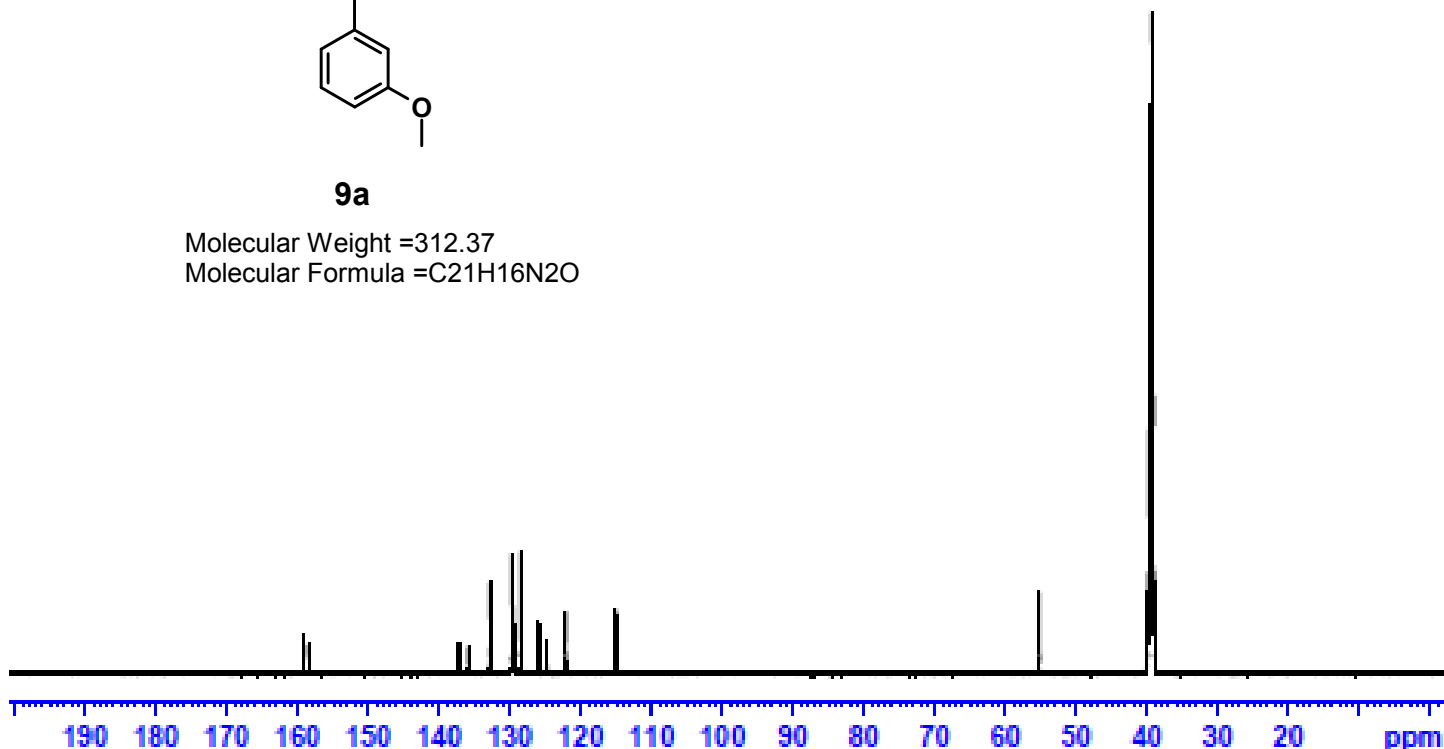

SRD-AA  
 PROTON\_DepttChem DMSO {D:\AHMEDNAGAR} root 27

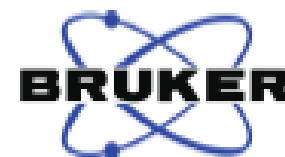

Current Data Parameters  
 NAME Dec31-2014  
 EXPNO 6  
 PROCNO 1

F2 - Acquisition Parameters  
 Date\_ 20141231  
 Time 18.48  
 INSTRUM spect  
 PROBP1 5 mm PABBO QNP/  
 PULPROG zg30  
 TD 65536  
 SOLVENT DMSO  
 NS 16  
 DS 2  
 SWH 10000.000 Hz  
 FIDRES 0.152588 Hz  
 AQ 1.2787999 sec  
 RG 96  
 DW 50.000 usec  
 DE 6.50 usec  
 TE 296.3 K  
 D1 1.00000000 sec  
 TD0 1

===== CHANNEL F1 =====  
 SFO1 500.1320885 MHz  
 NUC1 1H  
 P1 9.22 usec  
 PLW1 22.00000000 W

F2 - Processing parameters  
 SI 65536  
 SF 500.1300015 MHz  
 WDW EM  
 SSB 0  
 LB 0.10 Hz  
 GB 0  
 PC 1.00

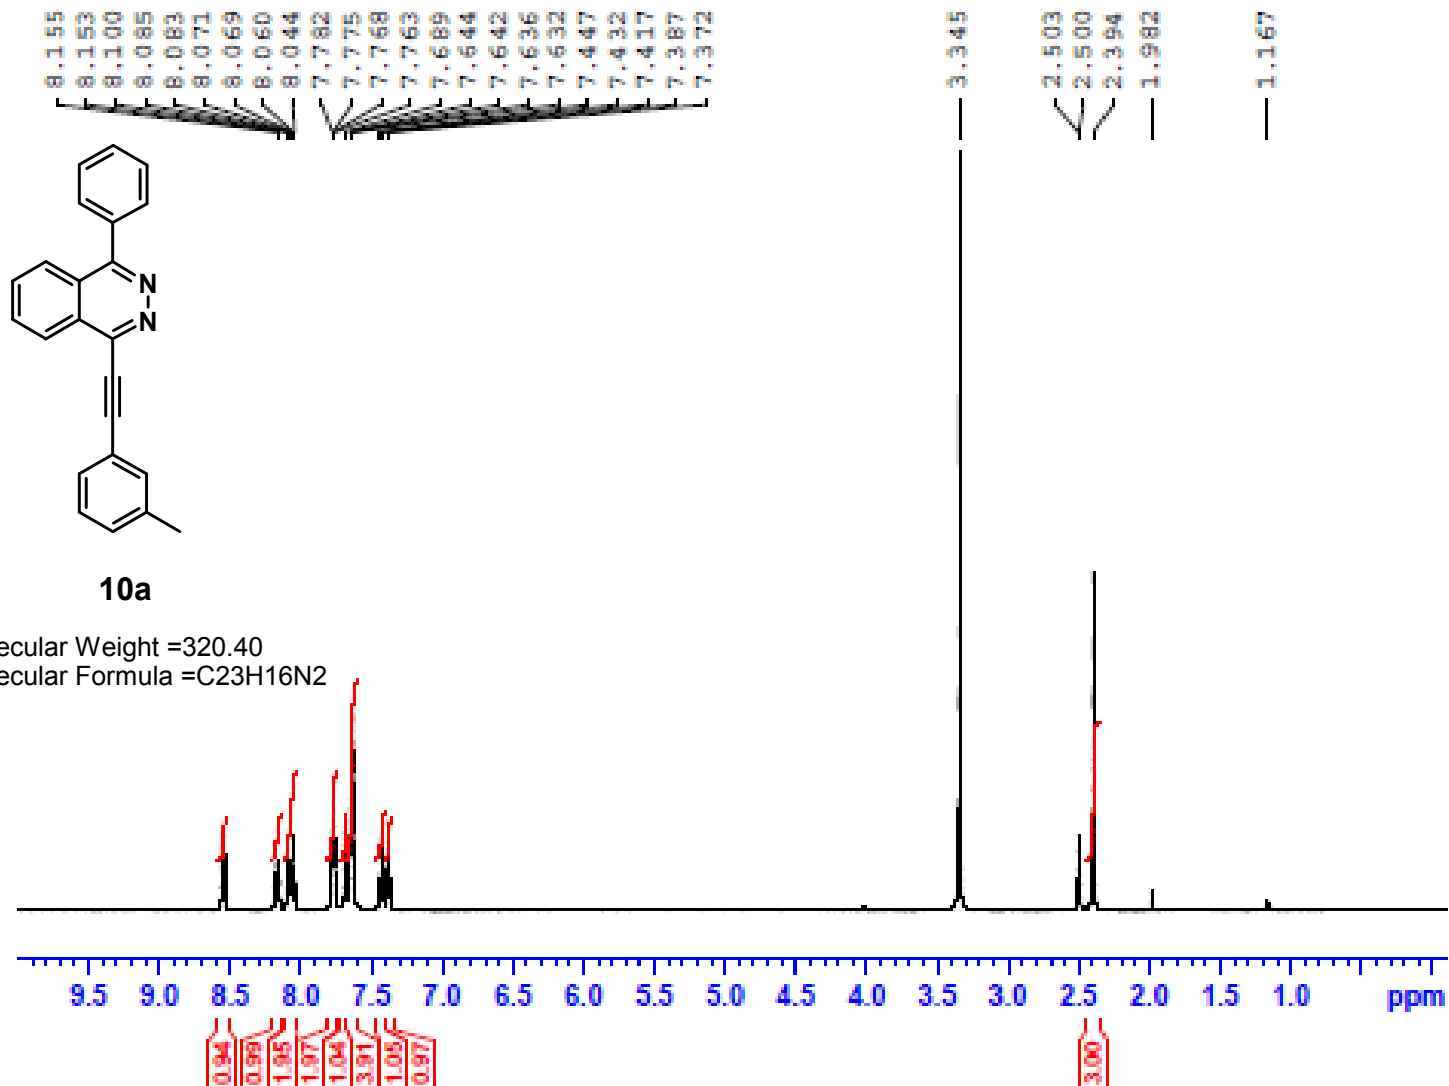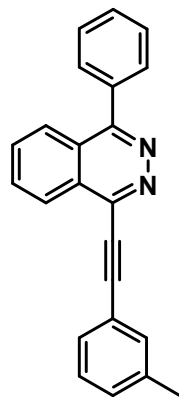

10a

Molecular Weight =320.40  
 Molecular Formula =C23H16N2

SRD-AA  
 C13CPD DMSO {D:\AHMEDNAGAR} root 27

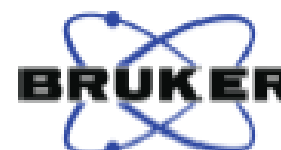

Current Data Parameters  
 NAME Dec11-2014  
 EXPNO 2  
 PROCNO 1

F2 - Acquisition Parameters  
 Date\_ 20141231  
 Time\_ 16.16  
 INSTRUM spect  
 PROBHD 5 mm PABBO BB/  
 PULPROG zgpg30  
 TD 65536  
 SOLVENT DMSO  
 NS 800  
 DS 4  
 SWH 29761.904 Hz  
 FIDRES 0.454131 Hz  
 AQ 1.1010048 sec  
 RG 189.76  
 DW 16.800 usec  
 DE 6.50 usec  
 TE 297.7 K  
 D1 3.00000000 sec  
 D11 0.03000000 sec  
 TD0 1

----- CHANNEL f1 -----  
 SFO1 125.7703637 MHz  
 NUC1 13C  
 P1 9.25 usec  
 PLW1 100.00000000 W  
 ----- CHANNEL f2 -----  
 SFO2 500.1320005 MHz  
 NUC2 1H  
 CPDPRG(2) waltz16  
 PCPD2 80.00 usec  
 PLW2 22.00000000 W  
 PLW12 0.29222000 W  
 PLW13 0.18702000 W

F2 - Processing parameters  
 SI 32768  
 SF 125.7578570 MHz  
 WDW EM  
 SSR 0  
 LB 1.00 Hz  
 GB 0  
 PC 1.40

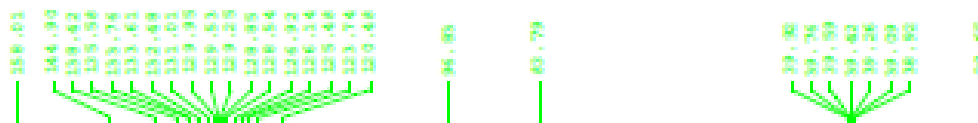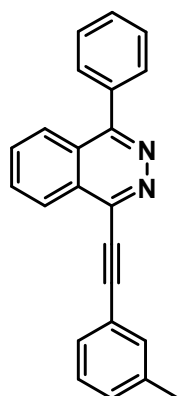

10a

Molecular Weight =320.40  
 Molecular Formula =C23H16N2

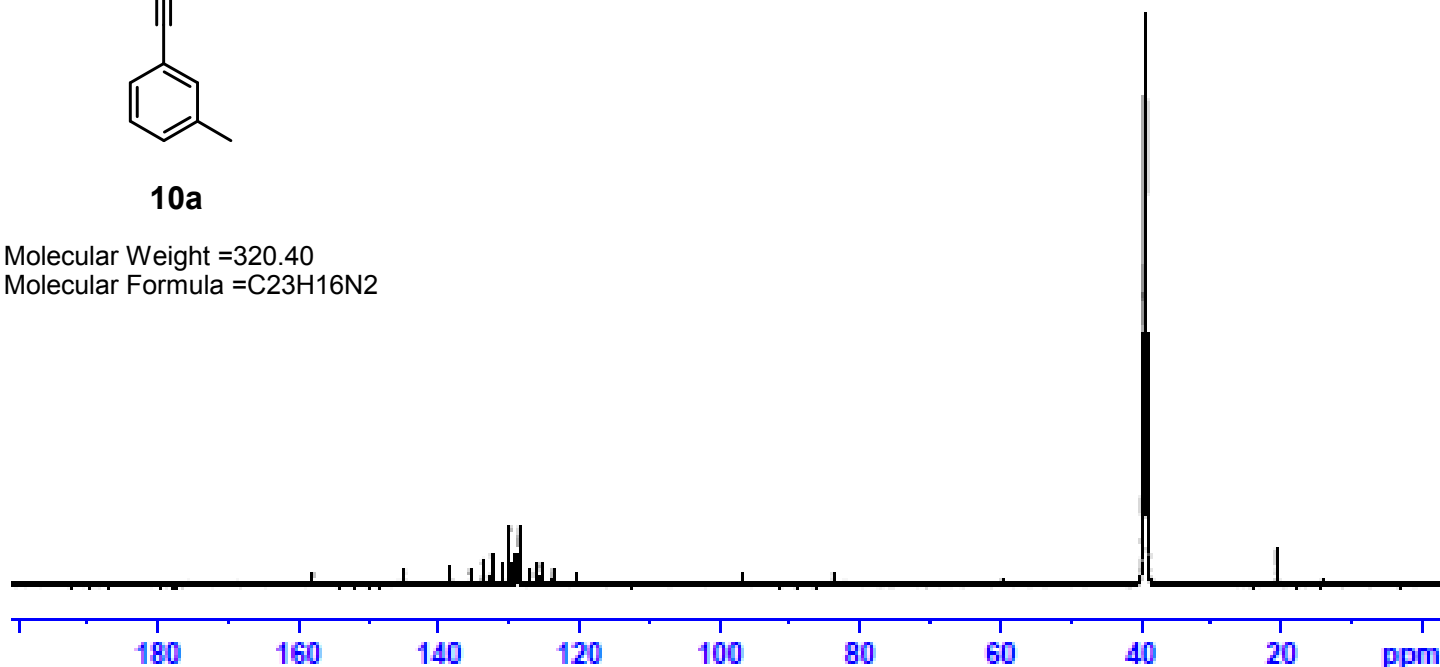

Supplement: c5ra03390j1.pdf [file c5ra03390j1.pdf]
